# Supplementary material for: Cascade radical cyclization on 3-propargyl-2-alkenyl indole gives stereoselective access to cyclohepta[b]indole over carbazole
Source: Royal Society of Chemistry journal article supplement (doi:10.1039/d3cc05237k), 2023-11-27
Supplement: d3cc05237k1.pdf [file d3cc05237k1.pdf]

## Supporting Information

### Cascade Radical Cyclization on 3-Propargyl-2-Alkenyl Indole Gives Stereoselective Access to Cyclohepta[*b*]indole over Carbazole

Santosh J. Gharpure,\* Sanyog Kumari

Department of Chemistry, Indian Institute of Technology Bombay, Powai, Mumbai-400076

India. Fax: +91-22-2576 7152; Tel: +91-22-2576 7171; E-mail: [sjgharpure@iitb.ac.in](mailto:sjgharpure@iitb.ac.in)

#### Table of Contents

- **General.....S2**
- **Experimental Procedure.....S3-S24**
- **NMR Spectra .....S25-S91**
- **X-Ray crystallographic analysis.....S92-S97**

## General

IR spectra were recorded on Nicolet 6700 spectrophotometer.  $^1\text{H}$  and  $^{13}\text{C}$  NMR spectra were recorded on Bruker Avance 400 and 500 spectrophotometers. The chemical shifts ( $\delta$ , ppm) and coupling constants (Hz) are reported in the standard fashion with reference to residual  $\text{CHCl}_3$  at (7.26 ppm for  $^1\text{H}$ ) and the central line (77.16 ppm for  $^{13}\text{C}$ ) of  $\text{CDCl}_3$ . In the  $^{13}\text{C}$  NMR spectra, the nature of the carbons (C, CH,  $\text{CH}_2$  or  $\text{CH}_3$ ) was determined by recording the DEPT-135 experiment, and are given in parentheses. NOE spectrum was recorded on Bruker Avance 400 and 500 MHz spectrophotometer. Analytical thin-layer chromatography (TLC) was performed on glass plates ( $7.5 \times 2.5$  and  $9 \times 5.0$  cm) coated with Merck or Acme's silica gel G containing 13% calcium sulphate as binder or on pre-coated 0.2 mm thick Merck 60 F245 silica plates and various combinations of ethyl acetate and petroleum ether were used as eluent. Visualization of spots was accomplished by either exposure to iodine vapour or  $\text{KMnO}_4$  and vanillin stain. Acme's silica gel (100-200 mesh) was used for column chromatography (approximately 15-20 g per 1 g of the crude reaction mixture). All small-scale dry reactions were carried out using standard syringe septum technique. Dry THF, ether, benzene was obtained by distillation over sodium-benzophenone ketyl. Dry dichloromethane and dry DMF, dry acetonitrile, dry toluene was prepared by distilling over calcium hydride. PhSH and AIBN were obtained from Spectrochem. AIBN was recrystallize from methanol before using. All the commercial reagents were used as such without further purification. All the 3-propargyl-2-alkenyl indole derivatives were prepared following the known literature protocol<sup>1</sup>

### Plausible Mechanism for Cyclohepta[b]indole and Carbazole Formation

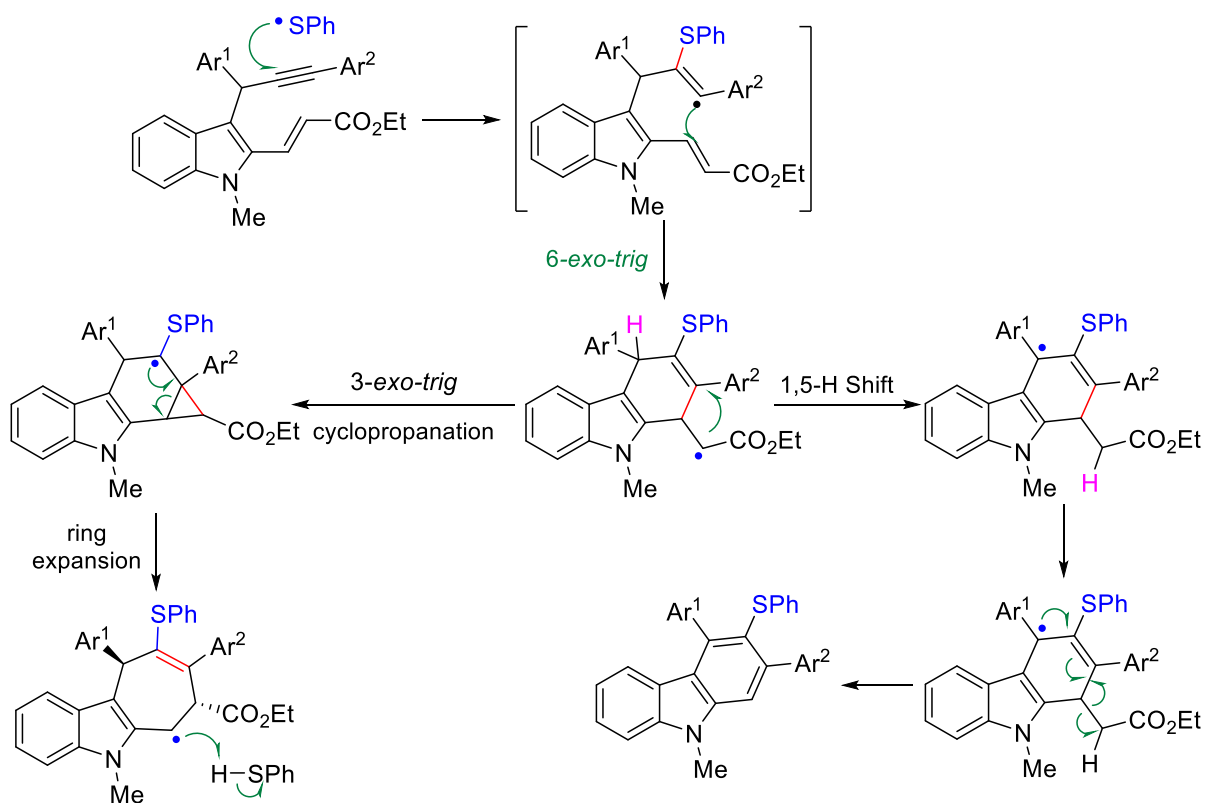

### General procedure for the Synthesis of 3-propargyl-2-alkenyl indole derivatives **6**

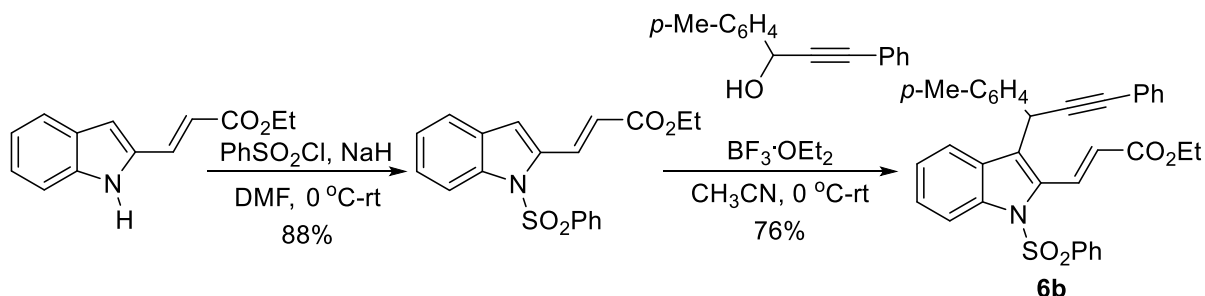

To a magnetically stirred solution of alkenyl indole (200 mg, 0.563 mmol) and propargylic alcohol (187 mg, 0.844 mmol) in dry acetonitrile (7 mL) was added  $\text{BF}_3 \cdot \text{OEt}_2$  (10 mol%) at 0 °C and the reaction mixture was allowed to stirred at room temperature until the completion of starting material (TLC controlled) The reaction was quenched with saturated solution of  $\text{NaHCO}_3$ , extracted with EtOAc ( $3 \times 25$  mL). The combine organic layer was washed with brine and dried over  $\text{Na}_2\text{SO}_4$ , evaporated under reduced pressure. The crude product was subjected to purification by silica gel column chromatography using EtOAc:Petroleum ether as eluent, furnished the 3-propargyl-2-alkenyl indole **6b** (240 mg, 76%) as a sticky solid.

1. Reddy, C. R.; Reddi, R. V.; Uredi, D. *Chem. Eur. J.* **2016**, *22*, 2501.

**General procedure for the synthesis of carbazole and cyclohepta[b]indole derivatives (7/8):**

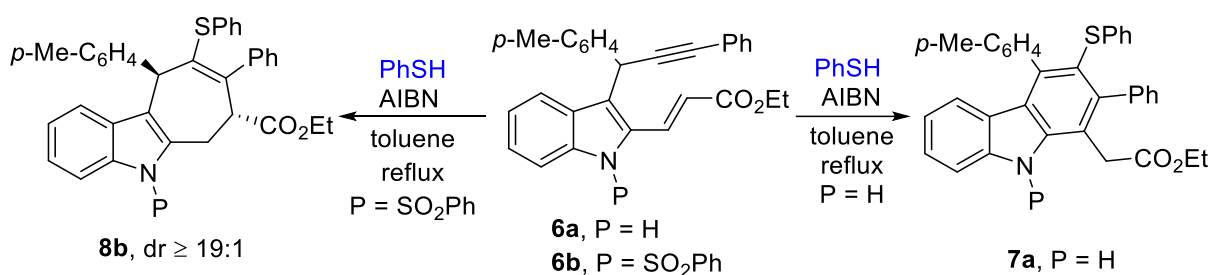

**ethyl 2-(2-phenyl-3-(phenylthio)-4-(p-tolyl)-9H-carbazol-1-yl)acetate (7a):**

To a magnetically stirred solution of the 3-propargyl-2-alkenyl indole **6a** (84 mg, 0.200 mmol) in dry toluene (4 mL) was added thiophenol (51  $\mu$ L, 0.500 mmol) and AIBN (39 mg, 0.200 mmol). The reaction mixture was allowed to reflux at 110  $^{\circ}$ C in an oil bath until the completion of starting material (TLC control). Solvent was evaporated under reduced pressure and the reaction mixture was subjected to purification on silica gel column chromatography by using DCM:Petroleum ether as eluent furnished tetra substituted carbazole **7a** (22 mg, 21%) as a sticky solid.

**ethyl (7R,10R)-8-phenyl-5-(phenylsulfonyl)-9-(phenylthio)-10-(p-tolyl)-5,6,7,10-tetrahydrocyclohepta[b]indole-7-carboxylate (8b):**

To a magnetically stirred solution of 3-propargyl-2-alkenyl indole **6b** (114 mg, 0.205 mmol) in dry toluene (4 mL) was added thiophenol (53  $\mu$ L, 0.512 mmol) and AIBN (34 mg, 0.205 mmol). The reaction mixture was allowed to reflux at 110  $^{\circ}$ C in an oil bath until the completion of starting material (TLC control). Solvent was evaporated under reduced pressure and the reaction mixture was subjected to purification on silica gel column chromatography by using EtOAc:Petroleum ether as eluent furnished cyclohepta[b]indole derivative **8b** (92 mg, 67%) as a crystalline solid.

**ethyl 2-(2-phenyl-3-(phenylthio)-4-(p-tolyl)-9H-carbazol-1-yl)acetate (7a):**

To a magnetically stirred solution of the 3-propargyl-2-alkenyl indole **6a** (84 mg, 0.200 mmol) in dry toluene (4 mL) was added thiophenol (51  $\mu$ L, 0.500 mmol) and AIBN (39 mg, 0.200 mmol). The reaction mixture was allowed to reflux at 110  $^{\circ}$ C in an oil bath until the completion of starting material (TLC control). Solvent was evaporated under reduced pressure and the reaction mixture was subjected to purification on silica gel column chromatography by using DCM:Petroleum ether as eluent furnished tetra substituted carbazole **7a** (22 mg, 21%) as a sticky solid.

**Physical appearance:** sticky solid.

**R<sub>f</sub>:** 0.3 (3:7, DCM:Petroleum ether).

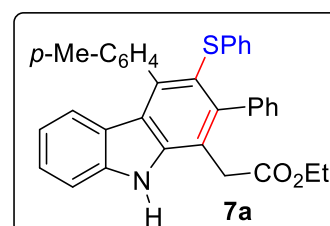

**IR (neat):** 3374, 2928, 2874, 1714, 1596, 1582, 1476, 1386, 1217, 1024, 757  $\text{cm}^{-1}$ .

**$^1\text{H}$  NMR (400 MHz,  $\text{CDCl}_3$ ):**  $\delta$  9.11 (bs, 1H), 7.47 (d,  $J = 8.0$  Hz, 1H), 7.35 (t,  $J = 8.0$  Hz, 1H), 7.29- 7.19 (m, 7H), 7.9 (d,  $J = 8.0$  Hz, 2H), 7.00-6.92 (m, 4H), 6.71 (d,  $J = 8.0$  Hz, 1H), 6.67 (d,  $J = 4.0$  Hz, 2H), 4.13 (q,  $J = 8.0$  Hz, 2H), 3.69 (s, 2H), 2.44 (s, 3H), 1.23 (t,  $J = 8.0$  Hz, 3H).

**$^{13}\text{C}$  NMR (100 MHz,  $\text{CDCl}_3$ , DEPT):**  $\delta$  171.9 (C), 145.4 (C), 142.9 (C), 141.2 (C), 140.5 (C), 140.1 (C), 140.0 (C), 137.1 (C), 137.0 (C), 130.0 ( $2 \times \text{CH}$ ), 129.1 ( $2 \times \text{CH}$ ), 128.9 ( $2 \times \text{CH}$ ), 128.1 ( $2 \times \text{CH}$ ), 127.4 ( $2 \times \text{CH}$ ), 127.1 (CH), 126.9 ( $2 \times \text{CH}$ ), 126.1 (CH), 124.2 (CH), 123.6 (C), 122.9 (C), 122.6 (CH), 121.8 (C), 120.0 (CH), 115.7 (C), 111.1 (CH), 61.5 ( $\text{CH}_2$ ), 36.9 ( $\text{CH}_2$ ), 21.5 ( $\text{CH}_3$ ), 14.2 ( $\text{CH}_3$ ).

**HRMS (ESI,  $\text{M}+\text{Na}^+$ ):**  $m/z$  calcd. for  $\text{C}_{35}\text{H}_{29}\text{NNaO}_2\text{S}$ , 550.1811 found 550.1807.

**ethyl (7*R*\*,10*R*\*)-8-phenyl-5-(phenylsulfonyl)-9-(phenylthio)-10-(*p*-tolyl)-5,6,7,10-tetrahydrocyclohepta[*b*]indole-7-carboxylate (8*b*):**

To a magnetically stirred solution of 3-propargyl-2-alkenyl indole **6b** (114 mg, 0.205 mmol) in dry toluene (4 mL) was added thiophenol (53  $\mu\text{L}$ , 0.512 mmol) and AIBN (34 mg, 0.205 mmol). The reaction mixture was allowed to reflux at 110  $^\circ\text{C}$  in an oil bath until the completion of starting material (TLC control). Solvent was evaporated under reduced pressure and the reaction mixture was subjected to purification on silica gel column chromatography by using EtOAc:Petroleum ether as eluent furnished cyclohepta[*b*]indole derivative **8b** (92 mg, 67%) as a crystalline solid.

**Physical appearance:** crystalline solid.

**MP.:** 178-180  $^\circ\text{C}$ .

**$R_f$ :** 0.7 (1.5:8.5, EtOAc:Petroleum ether).

**IR (neat):** 3047, 3023, 2989, 2345, 1737, 1582, 1509, 1447, 1376, 1175, 745  $\text{cm}^{-1}$ .

**$^1\text{H}$  NMR (500 MHz,  $\text{CDCl}_3$ ):**  $\delta$  8.29 (d,  $J = 8.5$  Hz, 1H), 7.82 (dd,  $J = 8.5, 1.0$  Hz, 2H), 7.56 (td,  $J = 1$  Hz), 7.48 (t,  $J = 8.0$  Hz, 2H), 7.35-7.27 (m, 4H), 7.15 (d,  $J = 8.0$  Hz, 4H), 7.05 (d,  $J = 8.5$  Hz, 2H), 7.01 (td,  $J = 8.0, 0.5$  Hz, 1H), 6.92 (td,  $J = 7.5, 1.5$  Hz, 1H), 6.84 ( $J = 8, 1$  Hz, 2H), 6.70 (t,  $J = 7.5$  Hz, 2H), 6.56 (d,  $J = 5.0$  Hz, 1H), 5.00 (s, 1H), 4.04 (dd,  $J = 11.5, 4.5$  Hz, 1H), 3.68-3.57 (m, 4H), 2.30 (s, 3H), 0.79 (t,  $J = 7.5$  Hz, 3H).

**$^{13}\text{C}$  NMR (125 MHz,  $\text{CDCl}_3$ , DEPT):**  $\delta$  171.4 (C), 141.4 (C), 139.4 (C), 139.2 (C), 138.6 (C), 138.5 (C), 136.4 (C), 136.2 (C), 135.3 (C), 134.0 (CH), 133.9 (C), 131.5 ( $2 \times \text{CH}$ ), 130.7 (C), 129.4 ( $4 \times \text{CH}$ ), 128.8 ( $2 \times \text{CH}$ ), 128.0 ( $2 \times \text{CH}$ ), 127.9 (CH), 127.0 (CH), 126.4 ( $6 \times \text{CH}$ ),

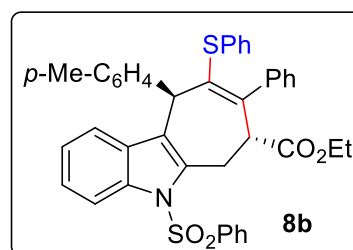

124.9 (CH), 123.9 (CH), 122.3 (C), 118.2 (CH), 114.9 (CH), 60.7 (CH<sub>2</sub>), 46.1 (CH), 43.2 (CH), 29.6 (CH<sub>2</sub>), 21.1 (CH<sub>3</sub>), 13.6 (CH<sub>3</sub>).

**HRMS (ESI, M+Na<sup>+</sup>):** m/z calcd. for C<sub>41</sub>H<sub>35</sub>NNaO<sub>4</sub>S<sub>2</sub> 692.1900, found 692.1891.

*ethyl* (7R\*,10R\*)-5-(methylsulfonyl)-8-phenyl-9-(phenylthio)-10-(p-tolyl)-5,6,7,10-tetrahydrocyclohepta[b]indole-7-carboxylate (**8c**):

The reaction of 3-propargyl-2-alkenyl indole **6c** (107 mg, 0.215 mmol), thiophenol (55 μL, 0.538 mmol) and AIBN (35 mg, 0.2152 mmol) in dry toluene (8 mL) as described for compound **8b**, followed by purification of the crude reaction mixture on silica gel column chromatography by using EtOAc: Petroleum ether as eluent furnished cyclohepta[b]indole derivative **8c** (85mg, 65%) as a sticky solid.

**Physical appearance:** sticky solid.

**R<sub>f</sub>:** 0.4 (1:9, EtOAc:Petroleum ether).

**IR (neat):** 3019, 2930, 1731, 1454, 1372, 1170, 756 cm<sup>-1</sup>.

**<sup>1</sup>H NMR (400 MHz, CDCl<sub>3</sub>):** δ 8.06 (d, *J* = 8.4 Hz, 1H), 7.38-

7.34 (m, 2H), 7.31-7.25 (m, 6H), 7.11-7.05 (m, 5H), 7.02 (t, *J* = 7.2 Hz, 1H), 6.91 (t, *J* = 7.6 Hz, 2H), 6.70 (d, *J* = 8.0 Hz, 1H), 5.15 (s, 1H) 4.12 (dd, *J* = 12.4, 3.2 Hz, 1H), 3.70-3.52 (m, 4H), 3.12 (s, 3H), 2.33 (3H), 0.79 (t, 7.2 Hz, 3H).

**<sup>13</sup>C NMR (100 MHz, CDCl<sub>3</sub>, DEPT):** δ 171.5 (C), 140.9 (C), 139.5 (C), 138.7 (C), 138.4 (C), 136.4 (C), 135.4 (C), 135.2 (C), 133.9 (C), 132.0 (3 × CH), 130.4 (C), 129.5 (2 × CH), 129.0 (3 × CH), 128.0 (2 × CH), 127.8 (CH), 127.4 (CH), 126.5 (2 × CH), 124.8 (CH), 123.8 (CH), 121.1 (C), 118.5 (CH), 114.0 (CH), 60.7 (CH<sub>2</sub>), 46.5 (CH), 43.0 (CH), 40.8 (CH<sub>3</sub>), 29.4 (CH<sub>2</sub>), 21.1 (CH<sub>3</sub>), 13.6 (CH<sub>3</sub>).

**HRMS (ESI, M+Na<sup>+</sup>):** m/z calcd. for C<sub>36</sub>H<sub>33</sub>NNaO<sub>4</sub>S<sub>2</sub> 630.1744 found 630.1744.

*ethyl* (7R\*,10R\*)-8-phenyl-9-(phenylthio)-10-(p-tolyl)-5-tosyl-5,6,7,10-tetrahydrocyclohepta[b]indole-7-carboxylate (**8d**):

The reaction of 3-propargyl-2-alkenyl indole **6d** (105 mg, 0.1830 mmol), thiophenol (46 μL, 0.457 mmol) and AIBN (30 mg, 0.183 mmol) in dry toluene (4 mL) as described for compound **8b**, followed by purification of the crude reaction mixture on silica gel column chromatography by using EtOAc:Petroleum ether as eluent furnished cyclohepta[b]indole derivative **8d** (58 mg, 46%) as a sticky solid.

**Physical appearance:** sticky solid.

**R<sub>f</sub>:** 0.5, (3:7, DCM:Petroleum ether).

**IR (neat):** 3026, 2980, 2925, 1736, 1597, 1453, 1375, 1214, 1173, 753cm<sup>-1</sup>.

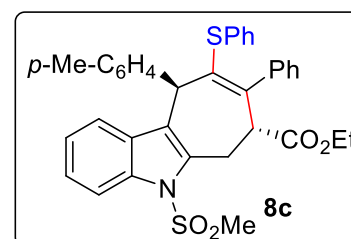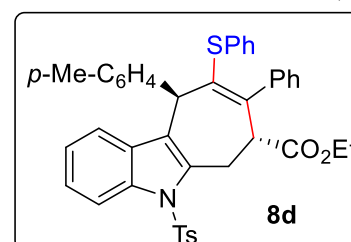

**<sup>1</sup>H NMR (500 MHz, CDCl<sub>3</sub>):** δ 8.29 (d, *J* = 8.0 Hz, 1H), 7.71 (d, *J* = 7.5 Hz, 2H), 7.36-7.25 (m, 6H), 7.16 (d, *J* = 7.5 Hz, 4H), 7.05 (d, *J* = 7.5 Hz, 2H), 7.00 (t, *J* = 7.5 Hz, 1H), 6.92 (t, *J* = 7.5 Hz, 1H), 6.84 (d, *J* = 8.0 Hz, 2H), 6.69 (t, *J* = 7.5 Hz, 2H), 6.56 (d, *J* = 8.0 Hz, 1H), 5.01 (s, 1H), 4.04 (dd, *J* = 12.5, 3.5 Hz, 1H), 3.65-3.57 (m, 4H), 2.35 (s, 3H), 2.30 (s, 3H), 0.79 (t, *J* = 7.0 Hz, 3H).

**<sup>13</sup>C NMR (125 MHz, CDCl<sub>3</sub>, DEPT):** δ 171.4 (C), 145.1 (C), 141.5 (C), 139.4 (C), 138.6 (C), 138.5 (C), 136.3 (C), 136.3 (C), 136.2 (C), 135.4 (C), 133.9 (C), 131.5 (2 × CH), 130.7 (C), 129.9 (2 × CH), 129.4 (2 × CH), 129.1 (CH), 128.8 (2 × CH), 127.9 (2 × CH), 127.8 (CH), 127.0 (CH), 126.5 (5 × CH), 124.7 (CH), 123.8 (CH), 122.1 (C), 118.2 (CH), 114.9 (CH), 60.7 (CH<sub>2</sub>), 46.2 (CH), 43.2 (CH), 29.6 (CH<sub>2</sub>), 21.7 (CH<sub>3</sub>), 21.1 (CH<sub>3</sub>), 13.6 (CH<sub>3</sub>).

**HRMS (ESI, M+Na<sup>+</sup>):** *m/z* calcd. for C<sub>42</sub>H<sub>37</sub>NNaO<sub>4</sub>S<sub>2</sub> 706.2056, found 706.2049.

*ethyl* (7*R*\*,10*R*\*)-5-acetyl-8-phenyl-9-(phenylthio)-10-(*p*-tolyl)-5,6,7,10-tetrahydrocyclohepta[*b*]indole-7-carboxylate (**8e**):

The reaction of 3-propargyl-2-alkenyl indole **6e** (72 mg, 0.156 mmol), thiophenol (40 μL, 0.389 mmol) and AIBN (26 mg, 0.156 mmol) in dry toluene (10 mL) as described for compound **8b**, followed by purification of the crude reaction mixture on silica gel column chromatography by using EtOAc:Petroleum ether as eluent furnished cyclohepta[*b*]indole derivative **8e** (50 mg, 56%) as a sticky solid.

**Physical appearance:** sticky solid.

**R<sub>f</sub>:** 0.5, (1:9, EtOAc:Petroleum ether).

**IR (neat):** 3019, 1733, 1709, 1461, 1307, 754 cm<sup>-1</sup>.

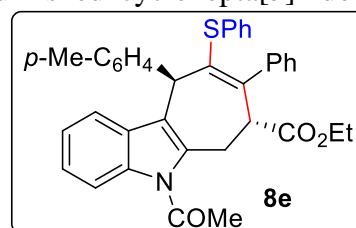

**<sup>1</sup>H NMR (400 MHz, CDCl<sub>3</sub>):** δ 7.87 (d, *J* = 8.4 Hz, 1H), 7.36-7.24 (m, 8H), 7.12-7.07 (m, 4H), 7.04-7.00 (m, 2H), 6.91 (t, *J* = 7.2 Hz, 2H), 6.67 (d, *J* = 7.6 Hz, 1H), 5.14 (s, 1H), 4.12 (dd, *J* = 12.8, 2.4 Hz, 1H), 3.82-3.75 (m, 1H), 3.66-3.54 (m, 3H), 2.87 (s, 3H), 2.31 (s, 3H), 0.78 (t, *J* = 7.2 Hz, 3H).

**<sup>13</sup>C NMR (100 MHz, CDCl<sub>3</sub>, DEPT):** 171.8 (C), 170.6 (C), 140.7 (C), 139.6 (C), 139.0 (C), 138.2 (C), 136.2 (C), 136.1 (C), 134.9 (C), 134.0 (C), 131.9 (2 × CH), 130.6 (C), 129.3 (2 × CH), 129.2 (CH), 129.0 (2 × CH), 128.0 (2 × CH), 127.8 (2 × CH), 127.2 (CH), 126.7 (2 × CH), 124.2 (CH), 123.0 (CH), 120.0 (C), 118.4 (CH), 114.5 (CH), 60.6 (CH<sub>2</sub>), 46.7 (CH), 42.8 (CH), 31.0 (CH<sub>2</sub>), 28.2 (CH<sub>3</sub>), 21.1 (CH<sub>3</sub>), 13.6 (CH<sub>3</sub>)

**HRMS (ESI, M+H<sup>+</sup>):** *m/z* calcd. for C<sub>37</sub>H<sub>34</sub>NO<sub>3</sub>S 572.2285 found 572.2285.

*ethyl* (7R\*,10R\*)-5-methyl-8-phenyl-9-(phenylthio)-10-(p-tolyl)-5,6,7,10-tetrahydrocyclohepta[b]indole-7-carboxylate (**8f**):

The reaction of 3-propargyl-2-alkenyl indole **6f** (41 mg, 0.095 mmol), thiophenol (24  $\mu$ L, 0.236 mmol) and AIBN (16 mg, 0.095 mmol) in dry toluene (3 mL) as described for compound **8b**, followed by purification of the crude reaction mixture on silica gel column chromatography by using EtOAc:Petroleum ether as eluent furnished cyclohepta[b]indole derivative **8f** (36 mg, 70%) and **7f** (14%) as a crystalline solid.

**Physical appearance:** crystalline solid.

**MP.:** 169-171  $^{\circ}$ C.

**R<sub>f</sub>:** 0.6, (1:9, EtOAc:Petroleum ether).

**IR (neat):** 3021, 2928, 2854, 1732, 1582, 1508, 1471, 757  $\text{cm}^{-1}$ .

**<sup>1</sup>H NMR (400 MHz, CDCl<sub>3</sub>):**  $\delta$  7.38-7.32 (m, 8H), 7.19 (t,  $J$  = 7.2 Hz, 1H), 7.13-7.06 (m, 5H), 6.96-6.91 (m, 3H), 6.80 (d,  $J$  = 8.0 Hz, 1H), 5.22 (s, 1H), 4.18 (dd,  $J$  = 13.2, 3.2 Hz, 1H), 3.78 (s, 3H), 3.73-3.58 (m, 2H), 3.39 (dd,  $J$  = 17.2, 13.6 Hz, 1H), 3.22 (dd,  $J$  = 17.2, 3.2 Hz, 1H), 2.32 (s, 3H), 0.86 (t,  $J$  = 7.2 Hz, 3H).

**<sup>13</sup>C NMR (100 MHz, CDCl<sub>3</sub>, DEPT):**  $\delta$  172.4 (C), 140.6 (C), 140.2 (C), 139.9 (C), 138.2 (C), 136.1 (C), 135.7 (C), 134.7 (C), 134.0 (C), 132.1 (2  $\times$  CH), 129.4 (CH), 129.1 (2  $\times$  CH), 129.0 (2  $\times$  CH), 128.0 (C), 127.9 (2  $\times$  CH), 127.7 (CH), 127.1 (CH), 126.8 (3  $\times$  CH), 121.1 (CH), 119.1 (CH), 118.1 (CH), 112.0 (C), 108.4 (CH), 60.6 (CH<sub>2</sub>), 46.2 (CH), 42.5 (CH), 29.7 (CH<sub>3</sub>), 27.3 (CH<sub>2</sub>), 21.1 (CH<sub>3</sub>), 13.7 (CH<sub>3</sub>).

**HRMS (ESI, M+K<sup>+</sup>):**  $m/z$  calcd. for C<sub>36</sub>H<sub>33</sub>KNO<sub>2</sub>S 582.1864, found 582.1861.

*9-methyl-2-phenyl-3-(phenylthio)-4-(p-tolyl)-9H-carbazole (9f):*

**Physical appearance:** sticky solid.

**R<sub>f</sub>:** 0.9, (1:9, EtOAc:Petroleum ether).

**IR (neat):** 3011, 2928, 2857, 1585, 1476, 1216, 755  $\text{cm}^{-1}$ .

**<sup>1</sup>H NMR (400 MHz, CDCl<sub>3</sub>):**  $\delta$  7.45 (s, 1H), 7.41-7.36 (m, 4H), 7.29-7.27 (m, 3H), 7.24-7.18 (m, 4H), 6.99-6.90 (m, 4H), 6.74 (d,  $J$  = 8.0 Hz, 1H), 6.68 (d,  $J$  = 7.2 Hz, 2H), 3.89 (s, 3H), 2.46 (s, 3H).

**<sup>13</sup>C NMR (100 MHz, CDCl<sub>3</sub>, DEPT):**  $\delta$  145.8 (C), 143.9 (C), 142.8 (C), 141.7 (C), 141.2 (2  $\times$  C), 137.2 (C), 137.1 (C), 129.8 (2  $\times$  CH), 129.1 (2  $\times$  CH), 128.9 (2  $\times$  CH), 128.2 (2  $\times$  CH), 127.4 (2  $\times$  CH), 126.9 (CH), 126.8 (2  $\times$  CH), 126.0 (CH), 124.3 (CH), 122.8 (C), 122.6 (CH), 122.2 (C), 120.2 (C), 119.5 (CH), 110.5 (CH), 108.4 (CH), 29.3 (CH<sub>3</sub>), 21.6 (CH<sub>3</sub>).

**HRMS (ESI, M+K<sup>+</sup>):**  $m/z$  calcd. for C<sub>32</sub>H<sub>25</sub>KNS 494.1339, found 494.1336.

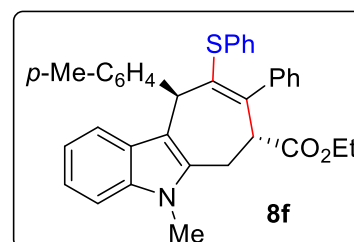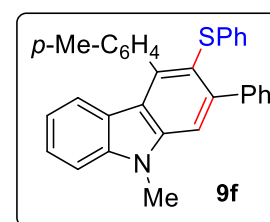



*ethyl* (7*R*\*,10*R*\*)-5-benzyl-8-phenyl-9-(phenylthio)-10-(*p*-tolyl)-5,6,7,10-tetrahydrocyclohepta[*b*]indole-7-carboxylate (**8g**):

The reaction of 3-propargyl-2-alkenyl indole **6g** (100 mg, 0.203 mmol) with thiophenol (52  $\mu$ L, 0.508 mmol) and AIBN (33 mg, 0.2034 mmol) in dry toluene (8 mL) as described for compound **8b**, followed by purification of crude reaction mixture on silica gel column chromatography by using EtOAc:Petroleum ether as eluent furnished cyclohepta[*b*]indole derivative **8g** (95 mg, 75 %), **9g** (13 mg 14%) as a sticky solid.

**Physical appearance:** sticky solid.

**R<sub>f</sub>:** 0.5 (1:9, EtOAc:Petroleum ether).

**IR (neat):** 3019, 2831, 1729, 1466, 1216, 1027, 759  $\text{cm}^{-1}$ .

**<sup>1</sup>H NMR (500 MHz, CDCl<sub>3</sub>):**  $\delta$  7.35 (d,  $J$  = 7.5 Hz, 2H), 7.32-

7.25 (m, 7H), 7.20 (d,  $J$  = 7.0 Hz, 2H), 7.14-7.09 (m, 5H), 7.04 (t,  $J$  = 7.5 Hz, 1H), 6.97 (d,  $J$  = 7.5 Hz, 2H), 6.94-6.90 (m, 3H), 6.84 (d,  $J$  = 8.0 Hz, 1H), 5.43 (dd,  $J$  = 22.0, 17.5 Hz, 2H), 5.26 (s, 1H), 4.17 (dd, 13.0, 3.0 Hz, 1H), 3.66-3.53 (m, 2H), 3.32 (dd,  $J$  = 17.0, 13.0 Hz, 1H), 3.13 (dd,  $J$  = 17.5, 3.0 Hz, 1H), 2.32 (s, 3H), 0.81 (t,  $J$  = 7.0 Hz, 3H).

**<sup>13</sup>C NMR (125 MHz, CDCl<sub>3</sub>, DEPT):**  $\delta$  172.2 (C), 140.5 (C), 140.1 (C), 139.8 (C), 139.4 (C), 137.8 (C), 136.1 (C), 135.8 (C), 134.6 (C), 134.1 (C), 131.8 (2  $\times$  CH), 129.2 (2  $\times$  CH), 129.0 (2  $\times$  CH), 128.9 (3  $\times$  CH), 128.3 (C), 127.9 (2  $\times$  CH), 127.6 (CH), 127.5 (CH), 127.0 (CH), 126.7 (2  $\times$  CH), 125.9 (3  $\times$  CH), 121.6 (CH), 119.5 (CH), 118.2 (CH), 113.1 (C), 109.0 (CH), 60.6 (CH<sub>2</sub>), 46.5 (CH<sub>2</sub>), 46.0 (CH), 43.1 (CH), 27.0 (CH<sub>2</sub>), 21.1 (CH<sub>3</sub>), 13.6 (CH<sub>3</sub>).

**HRMS (ESI, M+H<sup>+</sup>):**  $m/z$  calcd. for C<sub>42</sub>H<sub>38</sub>NO<sub>2</sub>S 620.2639 found 620.2639.

**9-benzyl-2-phenyl-3-(phenylthio)-4-(*p*-tolyl)-9H-carbazole (**9g**):**

**Physical appearance:** sticky solid.

**R<sub>f</sub>:** 0.8 (1:9, EtOAc:Petroleum ether).

**IR (neat):** 3017, 1586, 1415, 1215, 756  $\text{cm}^{-1}$ .

**<sup>1</sup>H NMR (400 MHz, CDCl<sub>3</sub>):**  $\delta$  7.44 (s, 1H), 7.36-7.29 (m, 5H), 7.28-

7.20 (m, 11H), 7.00-6.91 (m, 4H), 6.76 (d,  $J$  = 8.0 Hz, 1H), 6.70 (d,  $J$  = 7.2 Hz, 2H), 5.55 (s, 2H), 2.47 (s, 3H).

**<sup>13</sup>C NMR (100 MHz, CDCl<sub>3</sub>, DEPT):**  $\delta$  145.9 (C), 144.0 (C), 142.7 (C), 141.4 (C), 141.1 (C), 141.0 (C), 137.2 (2  $\times$  C), 136.8 (C), 129.8 (2  $\times$  CH), 129.1 (2  $\times$  CH), 129.1 (2  $\times$  CH), 128.9 (2  $\times$  CH), 128.2 (2  $\times$  CH), 127.7 (CH), 127.4 (2  $\times$  CH), 127.0 (2  $\times$  CH), 126.9 (CH), 126.6 (2  $\times$  CH), 126.1 (CH), 124.3 (CH), 123.0 (C), 122.7 (CH), 122.4 (C), 120.7 (C), 119.8 (CH), 110.6 (CH), 109.0 (CH), 46.8 (CH<sub>2</sub>), 21.6 (CH<sub>3</sub>).

**HRMS (ESI, M+H<sup>+</sup>):**  $m/z$  calcd. for C<sub>38</sub>H<sub>30</sub>NS 532.2092 found 532.2092.

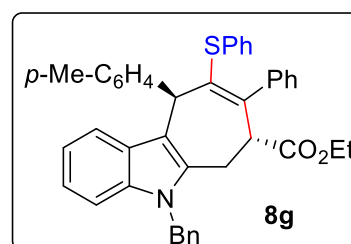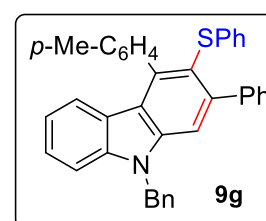

*ethyl* (7*R*\*,10*R*\*)-8,10-diphenyl-5-(phenylsulfonyl)-9-(phenylthio)-5,6,7,10-tetrahydrocyclohepta[*b*]indole-7-carboxylate (**8h**):

The reaction of 3-propargyl-2-alkenyl indole **6h** (62 mg, 0.114 mmol), thiophenol (29  $\mu$ L, 0.2840 mmol) and AIBN (19 mg, 0.1136 mmol) in dry toluene (3 mL) as described for compound **8b**, followed by purification of the crude reaction mixture on silica gel column chromatography by using EtOAc:Petroleum ether as eluent furnished cyclohepta[*b*]indole derivative **8h** (50 mg, 67%) as a sticky solid.

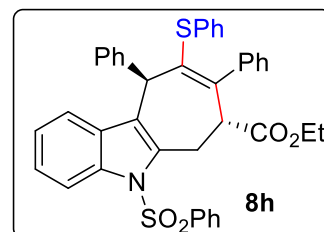

**Physical appearance:** sticky solid.

**R<sub>f</sub>:** 0.6, (1:9, EtOAc:Petroleum ether).

**IR (neat):** 3058, 3027, 2922, 1735, 1597, 1582, 1474, 1447, 1376, 1217, 1173, 754  $\text{cm}^{-1}$ .

**<sup>1</sup>H NMR (400 MHz, CDCl<sub>3</sub>):**  $\delta$  8.30 (d,  $J$  = 8.4 Hz, 1H), 7.83 (d,  $J$  = 8.0 Hz, 2H), 7.58 (t,  $J$  = 7.2 Hz, 1H), 7.48 (t,  $J$  = 8.0 Hz, 2H), 7.35-7.20 (m, 9H), 7.14 (d,  $J$  = 6.8 Hz, 2H), 7.01 (t,  $J$  = 7.2 Hz, 1H), 6.92 (t,  $J$  = 7.6 Hz, 1H), 6.84 (d,  $J$  = 7.6 Hz, 2H), 6.70 (t,  $J$  = 7.6 Hz, 2H), 6.57 (d,  $J$  = 8.0 Hz, 1H), 5.04 (s, 1H), 4.00 (dd,  $J$  = 10.4, 5.2 Hz, 1H), 3.69-3.56 (m, 4H), 0.79 (t,  $J$  = 7.2 Hz, 3H).

**<sup>13</sup>C NMR (100 MHz, CDCl<sub>3</sub>, DEPT):**  $\delta$  171.4 (C), 141.7 (C), 141.5 (C), 139.3 (C), 139.2 (C), 138.7 (C), 136.2 (C), 135.4 (C), 134.0 (CH), 133.8 (C), 131.5 (2  $\times$  CH), 130.6 (C), 129.4 (3  $\times$  CH), 129.0 (CH), 128.9 (2  $\times$  CH), 128.7 (2  $\times$  CH), 128.0 (2  $\times$  CH), 127.9 (CH), 127.1 (CH), 126.8 (CH), 126.6 (2  $\times$  CH), 126.4 (2  $\times$  CH), 124.9 (CH), 123.9 (CH), 122.1 (C), 118.2 (CH), 114.9 (CH), 60.7 (CH<sub>2</sub>), 46.1 (CH), 43.5 (CH), 29.6 (CH<sub>2</sub>), 13.6 (CH<sub>3</sub>).

**HRMS (ESI, M+K<sup>+</sup>):**  $m/z$  calcd. for C<sub>40</sub>H<sub>33</sub>KNO<sub>4</sub>S<sub>2</sub> 694.1483, found 694.1479.

*ethyl* (7*R*\*,10*R*\*)-10-(4-methoxyphenyl)-8-phenyl-5-(phenylsulfonyl)-9-(phenylthio)-5,6,7,10-tetrahydrocyclohepta[*b*]indole-7-carboxylate (**8i**):

The reaction of 3-propargyl-2-alkenyl indole **6i** (102 mg, 0.177 mmol), thiophenol (45  $\mu$ L, 0.443 mmol) and AIBN (30 mg, 0.177 mmol) in dry toluene (4 mL) as described for compound **8b**, followed by purification of the crude reaction mixture on silica gel column chromatography by using EtOAc:Petroleum ether as eluent furnished cyclohepta[*b*]indole derivative **8i** (76 mg, 62%) as a sticky solid.

**Physical appearance:** sticky solid.

**R<sub>f</sub>:** 0.6 (1.5:8.5, EtOAc:Petroleum ether).

**IR (neat):** 2928, 2849, 1733, 1608, 1508, 1453, 1376, 1249, 1175, 756  $\text{cm}^{-1}$ .

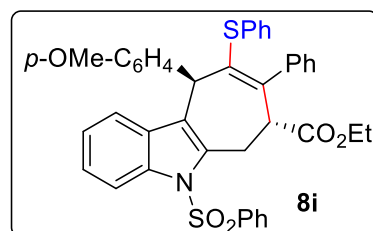

**<sup>1</sup>H NMR (400 MHz, CDCl<sub>3</sub>):** δ 8.30 (d, *J* = 8.4 Hz, 1H), 7.83 (d, *J* = 7.6 Hz, 2H), 7.58 (t, *J* = 7.6 Hz, 1H), 7.48 (t, 8.0 Hz, 2H), 7.36-7.27 (m, 4H), 7.18 (d, *J* = 8.8 Hz, 2H) 7.14 (d, *J* = 7.6 Hz, 2H), 7.01 (t, *J* = 7.2 Hz, 1H), 6.92 (t, *J* = 7.2 Hz, 1H), 6.83 (d, *J* = 8.0 Hz, 2H), 6.78 (d, *J* = 8.8 Hz, 2H), 6.70 (t, *J* = 7.6 Hz, 2H), 6.57 (d, *J* = 7.6 Hz, 1H), 4.99 (s, 1H), 4.07 (dd, *J* = 9.6, 6.4 Hz, 1H), 3.77 (s, 3H), 3.67-3.61 (m, 4H), 0.80 (t, *J* = 7.2 Hz, 3H).

**<sup>13</sup>C NMR (100 MHz, CDCl<sub>3</sub>, DEPT):** δ 171.4 (C), 158.4 (C), 141.6 (C), 139.4 (C), 139.1 (C), 138.6 (C), 136.2 (C), 135.4 (C), 134.0 (CH), 133.9 (C), 133.5(C), 131.4 (2 × CH), 130.6 (C), 129.4 (3 × CH), 129.0 (CH), 128.8 (2 × CH), 127.9 (2 × CH), 127.8 (CH), 127.6 (2 × CH), 127.0 (CH), 126.4 (2 × CH), 124.9 (CH), 123.9 (CH), 122.4 (C), 118.2 (CH), 114.9 (CH), 114.1 (2 × CH), 60.7 (CH<sub>2</sub>), 55.4 (CH<sub>3</sub>), 46.0 (CH), 42.9 (CH), 29.7 (CH<sub>2</sub>), 13.6 (CH<sub>3</sub>).

**HRMS (ESI, M+K<sup>+</sup>):** *m/z* calcd. for C<sub>41</sub>H<sub>35</sub>KNO<sub>5</sub>S<sub>2</sub> 724.1588, found 724.1585

*ethyl (7R\*,10S\*)-10-(2-methoxyphenyl)-8-phenyl-5-(phenylsulfonyl)-9-(phenylthio)-5,6,7,10-tetrahydrocyclohepta[b]indole-7-carboxylate (8j):*

The reaction of 3-propargyl-2-alkenyl indole **6j** (100 mg, 0.174 mmol), thiophenol (44 μL, 0.435 mmol) and AIBN (28 mg, 0.174 mmol) in dry toluene (12 mL) as described for compound **8b**, followed by purification of the crude reaction mixture on silica gel column chromatography by using EtOAc:Petroleum ether as eluent furnished cyclohepta[b]indole derivative **8j** (50 mg, 42%) as a sticky solid.

**Physical appearance:** sticky solid.

**R<sub>f</sub>:** 0.4 (1:9, EtOAc:Petroleum ether).

**IR (neat):** 2928, 2850, 1733, 1598, 1583, 1487, 1453, 1374, 1249, 1174, 754 cm<sup>-1</sup>.

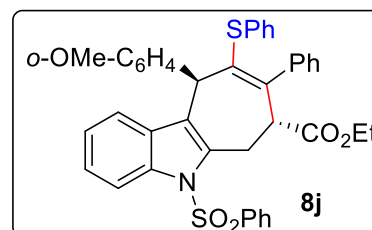

**<sup>1</sup>H NMR (500 MHz, CDCl<sub>3</sub>):** δ 8.25 (d, *J* = 8.5 Hz, 1H), 7.76 (d, *J* = 8.0 Hz, 2H), 7.54 (t, *J* = 7.5 Hz, 1H), 7.42 (t, *J* = 8.0 Hz, 2H), 7.27-7.19 (m, 5H), 7.06-7.00 (m, 3H), 6.92-6.84 (m, 5H), 6.78-6.73 (m, 4H), 5.24 (s, 1H), 4.29 (dd, *J* = 10.0, 5.0 Hz, 1H), 3.72 (s, 3H), 3.70-3.64 (m, 4H), 0.77 (t, *J* = 7.0 Hz, 3H).

**<sup>13</sup>C NMR (125 MHz, CDCl<sub>3</sub>, DEPT):** δ 171.4 (C), 157.5 (C), 142.2 (C), 140.8 (C), 138.9 (C), 137.6 (C), 136.3 (C), 135.4 (C), 135.4 (C), 133.7 (CH), 131.0 (2 × CH), 130.2 (C), 129.2 (C), 129.2 (2 × CH), 128.6 (CH), 128.5 (3 × CH), 128.2 (CH), 127.7 (2 × CH), 127.3 (CH), 126.3 (3 × CH), 126.2 (CH), 124.5 (CH), 123.5 (CH), 122.5 (C), 120.1 (CH), 118.7 (CH), 114.8 (CH), 111.2 (CH), 60.7 (CH<sub>2</sub>), 54.9 (CH<sub>3</sub>), 46.2 (CH), 42.2 (CH), 28.7 (CH<sub>2</sub>), 13.5 (CH<sub>3</sub>).

**HRMS (ESI, M+K<sup>+</sup>):** *m/z* calcd. for C<sub>41</sub>H<sub>35</sub>KNO<sub>5</sub>S<sub>2</sub> 724.1588, found 724.1578.

**ethyl (7R\*,10R\*)-10-(4-chlorophenyl)-8-phenyl-5-(phenylsulfonyl)-9-(phenylthio)-5,6,7,10-tetrahydrocyclohepta[b]indole-7-carboxylate (8k):**

The reaction of 3-propargyl-2-alkenyl indole **6k** (87 mg, 0.150 mmol), thiophenol (38  $\mu$ L, 0.375 mmol) and AIBN (25 mg, 0.150 mmol) in dry toluene (10 mL) as described for compound **8b**, followed by purification of the crude reaction mixture on silica gel column chromatography by using EtOAc:Petroleum ether as eluent furnished cyclohepta[b]indole derivative **8k** (60 mg, 58%) sticky solid.

**Physical appearance:** sticky solid.

**R<sub>f</sub>:** 0.5 (1:9, EtOAc:Petroleum ether).

**IR (neat):** 2931, 1738, 1448, 1375, 1246, 1176, 755  $\text{cm}^{-1}$ .

**<sup>1</sup>H NMR (500 MHz, CDCl<sub>3</sub>):**  $\delta$  8.30 (d,  $J$  = 8.5 Hz, 1H), 7.83

(d,  $J$  = 8.0 Hz, 2H), 7.59 (t,  $J$  = 8.0 Hz, 1H), 7.49 (t,  $J$  = 8.0 Hz, 2H), 7.36-7.29 (m, 5H), 7.21 (bs, 3H), 7.12 (d,  $J$  = 7.0 Hz, 2H), 7.02 (t,  $J$  = 8.0 Hz, 1H), 6.94 (t,  $J$  = 7.5 Hz, 1H), 6.84 (d,  $J$  = 7.5 Hz, 2H), 6.72 (t,  $J$  = 7.5 Hz, 2H), 6.52 (d,  $J$  = 7.5 Hz, 1H), 4.97 (s, 1H), 3.92 (dd,  $J$  = 10.5, 5.5 Hz, 1H), 3.68-3.58 (m, 4H), 0.79 (t,  $J$  = 7.0 Hz, 3H).

**<sup>13</sup>C NMR (125 MHz, CDCl<sub>3</sub>, DEPT):**  $\delta$  171.2 (C), 141.7 (C), 140.2 (C), 139.1 (2  $\times$  C), 138.3 (C), 136.2 (C), 135.6 (C), 134.1 (CH), 133.6 (C), 132.7 (C), 131.6 (2  $\times$  CH), 130.3 (C), 129.4 (2  $\times$  CH), 128.9 (2  $\times$  CH), 128.8 (2  $\times$  CH), 128.0 (2  $\times$  CH), 128.0 (5  $\times$  CH), 127.2 (CH), 126.4 (2  $\times$  CH), 125.1 (CH), 124.0 (CH), 121.5 (C), 118.0 (CH), 115.0 (CH), 60.9 (CH<sub>2</sub>), 46.2 (CH), 43.0 (CH), 29.6 (CH<sub>2</sub>), 13.6 (CH<sub>3</sub>).

**HRMS (ESI, M+H<sup>+</sup>):**  $m/z$  calcd. for C<sub>40</sub>H<sub>33</sub>ClNO<sub>4</sub>S<sub>2</sub> 690.1497 found 690.1497.

**ethyl (7R\*,10R\*)-5-(phenylsulfonyl)-9-(phenylthio)-8,10-di-p-tolyl-5,6,7,10-tetrahydrocyclohepta[b]indole-7-carboxylate (8l):**

The reaction of 3-propargyl-2-alkenyl indole **6l** (52 mg, 0.091 mmol), thiophenol (23  $\mu$ L, 0.226 mmol) and AIBN (15 mg, 0.091 mmol) in dry toluene (3 mL) as described for compound **8b**, followed by purification of the crude reaction mixture on silica gel column chromatography by using EtOAc:Petroleum ether as eluent furnished the product

**8l** (40 mg, 65%) as a sticky solid.

**Physical appearance:** sticky solid.

**R<sub>f</sub>:** 0.8 (1:9, EtOAc:Petroleum).

**IR (neat):** 3020, 1735, 1448, 1375, 1174, 754  $\text{cm}^{-1}$ .

**<sup>1</sup>H NMR (400 MHz, CDCl<sub>3</sub>):**  $\delta$  8.29 (d,  $J$  = 8.4 Hz, 1H), 7.82 (dd,  $J$  = 8.4, 1.2 Hz, 2H), 7.59-7.55 (m, 1H), 7.47 (t,  $J$  = 7.2 Hz, 2H), 7.29 (dd,  $J$  = 7.2, 0.8 Hz, 1H), 7.16-7.13 (m, 4H), 7.05-6.98 (m, 5H), 6.91 (t,  $J$  = 7.2 Hz, 1H), 6.82 (dd,  $J$  = 8.4, 1.2 Hz, 2H), 6.89 (t,  $J$  = 8.0 Hz, 2H),

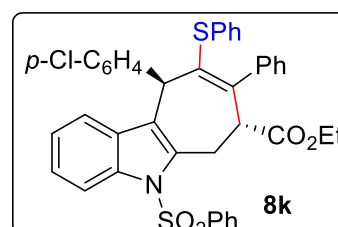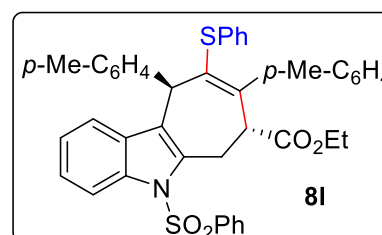

6.56 (d,  $J = 7.6$  Hz, 1H), 4.99 (s, 1H), 4.02 (dd,  $J = 10.8, 5.2$  Hz, 1H), 3.69-3.59 (m, 4H), 2.34 (s, 3H), 2.30 (s, 3H), 0.82 (t,  $J = 7.2$  Hz, 3H).

**$^{13}\text{C}$  NMR (100 MHz,  $\text{CDCl}_3$ , DEPT):**  $\delta$  171.5 (C), 141.5 (C), 139.2 (C), 138.6 (C), 138.3 (C), 137.6 (C), 136.4 (C), 136.3 (C), 136.2 (C), 135.4 (C), 134.0 (C), 134.0 (CH), 131.5 (2  $\times$  CH), 130.7 (C), 129.4 (4  $\times$  CH), 128.9 (CH), 128.8 (2  $\times$  CH), 128.7 (2  $\times$  CH), 127.0 (CH), 126.5 (2  $\times$  CH), 126.4 (3  $\times$  CH), 124.8 (CH), 123.9 (CH), 122.4 (C), 118.2 (CH), 114.9 (CH), 60.7 (CH<sub>2</sub>), 46.2 (CH), 43.2 (CH), 29.6 (CH<sub>2</sub>), 21.5 (CH<sub>3</sub>), 21.1 (CH<sub>3</sub>), 13.6 (CH<sub>3</sub>).

**HRMS (ESI,  $\text{M}+\text{Na}^+$ ):**  $m/z$  calcd. for  $\text{C}_{42}\text{H}_{37}\text{NNaO}_4\text{S}_2$  706.2056 found 706.2057.

*ethyl* (7*R*\*,10*R*\*)-8-(4-acetylphenyl)-5-(phenylsulfonyl)-9-(phenylthio)-10-(*p*-tolyl)-5,6,7,10-tetrahydrocyclohepta[b]indole-7-carboxylate (**8m**):

The reaction of 3-propargyl-2-alkenyl indole **6m** (63 mg, 0.105 mmol), thiophenol (27  $\mu\text{L}$ , 0.262 mmol) and AIBN (17 mg, 0.105 mmol) in dry toluene (5 mL) as described for compound **8b**, followed by purification of the crude reaction mixture on silica gel column chromatography by using DCM:Petroleum ether as eluent furnished the product **8m** in 63% yield as a sticky solid.

**Physical appearance:** sticky solid.

**$R_f$ :** 0.2 (4:6, DCM:Petroleum).

**IR (neat):** 3018, 2929, 1733, 1683, 1602, 1757  $\text{cm}^{-1}$ .

**$^1\text{H}$  NMR (400 MHz,  $\text{CDCl}_3$ ):**  $\delta$  8.29 (d,  $J = 8.5$  Hz, 1H), 7.93 (d,  $J = 8.0$  Hz, 2H), 7.81 (d,  $J = 8.0$  Hz, 2H), 7.60 (t,  $J = 7.5$  Hz, 1H), 7.49 (t,  $J = 8.0$  Hz, 2H), 7.31-7.24 (m, 3H), 7.13 (d,  $J = 8.0$  Hz, 2H), 7.04 (d,  $J = 8.0$  Hz, 2H), 6.95 (t,  $J = 7.5$  Hz, 2H), 6.84 (d,  $J = 8.0$  Hz, 2H), 6.74 (t,  $J = 7.5$  Hz, 2H), 6.55 (d,  $J = 8.0$  Hz, 1H), 5.02 (s, 1H), 4.07 (dd,  $J = 10.5, 6.0$  Hz, 1H), 3.68-3.60 (m, 4H), 2.61 (s, 3H), 2.30 (s, 3H), 0.81 (t,  $J = 7.5$  Hz, 3H).

**$^{13}\text{C}$  NMR (100 MHz,  $\text{CDCl}_3$ , DEPT):**  $\delta$  197.7 (C), 171.1 (C), 144.4 (C), 140.1 (C), 139.8 (C), 139.2 (C), 138.2 (C), 136.6 (C), 136.3 (C), 136.2 (C), 135.1 (C), 134.0 (CH), 133.3 (C), 131.7 (2  $\times$  CH), 130.5 (C), 129.5 (2  $\times$  CH), 129.5 (2  $\times$  CH), 129.0 (2  $\times$  CH), 128.1 (2  $\times$  CH), 127.4 (CH), 126.4 (6  $\times$  CH), 125.0 (CH), 123.9 (CH), 122.0 (C), 118.2 (CH), 114.9 (CH), 60.9 (CH<sub>2</sub>), 45.9 (CH), 43.3 (CH), 29.6 (CH<sub>2</sub>), 26.8 (CH<sub>3</sub>), 21.1 (CH<sub>3</sub>), 13.7 (CH<sub>3</sub>).

**HRMS (ESI,  $\text{M}+\text{K}^+$ ):**  $m/z$  calcd. for  $\text{C}_{43}\text{H}_{37}\text{KNO}_5\text{S}_2$ , 750.1745 found 750.1744.

*ethyl* (7*R*\*,10*R*\*)-8-(4-methoxyphenyl)-5-(phenylsulfonyl)-9-(phenylthio)-10-(*p*-tolyl)-5,6,7,10-tetrahydrocyclohepta[b]indole-7-carboxylate (**8n**):

The reaction of 3-propargyl-2-alkenyl indole **6n** (63 mg, 0.107 mmol), thiophenol (27  $\mu\text{L}$ , 0.267 mmol) and AIBN (18 mg, 0.107 mmol) in dry toluene (10 mL) as described for compound **8b**, followed by purification of the crude reaction mixture on silica gel column

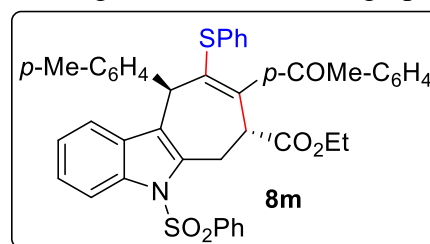

chromatography by using EtOAc:Petroleum ether as eluent furnished the product **8n** (39 mg, 52%) as a sticky solid.

**Physical appearance:** sticky solid.

**R<sub>f</sub>:** 0.2 (4:6, DCM:Petroleum ether).

**IR (neat):** 3019, 1732, 1508, 1375, 1246, 1177, 756 cm<sup>-1</sup>.

**<sup>1</sup>H NMR (400 MHz, CDCl<sub>3</sub>):** δ 8.29 (d, *J* = 8.0 Hz, 1H),

7.82 (d, *J* = 8.0 Hz, 2H), 7.57 (t, *J* = 8.0 Hz, 1H), 7.47 (t, *J* = 8.0 Hz, 2H), 7.28 (t, *J* = 8.0 Hz, 1H), 7.14 (d, *J* = 8.0 Hz, 2H), 7.10–6.98 (m, 5H), 6.92 (d, *J* = 7.6 Hz, 1H), 6.88–6.83 (m, 4H), 6.70 (t, *J* = 7.6 Hz, 2H), 6.56 (d, *J* = 8.0 Hz, 1H), 4.99 (s, 1H), 4.04–4.00 (m, 1H), 3.81 (s, 3H), 3.66 (q, *J* = 7.2 Hz, 2H), 3.62–3.56 (m, 2H), 2.30 (s, 3H), 0.84 (q, *J* = 7.2 Hz, 3H).

**<sup>13</sup>C NMR (100 MHz, CDCl<sub>3</sub>, DEPT):** δ 171.6 (C), 159.1 (C), 141.0 (C), 139.2 (C), 138.5 (C), 138.5 (C), 136.3 (C), 136.2 (C), 135.4 (C), 134.0 (CH), 131.8 (C), 131.5 (2 × CH), 130.7 (C), 130.2 (CH), 129.4 (6 × CH), 128.8 (2 × CH), 127.0 (C), 126.5 (2 × CH), 126.4 (2 × CH), 124.8 (CH), 123.9 (CH), 122.4 (C), 118.2 (CH), 114.9 (CH), 113.3 (2 × CH), 60.7 (CH<sub>2</sub>), 55.3 (CH<sub>3</sub>), 46.2 (CH), 43.2 (CH), 29.6 (CH<sub>2</sub>), 21.1 (CH<sub>3</sub>), 13.7 (CH<sub>3</sub>).

**HRMS (ESI, M+H<sup>+</sup>):** *m/z* calcd. for C<sub>42</sub>H<sub>38</sub>NO<sub>5</sub>S<sub>2</sub> 700.2179 found 700.2179.

**ethyl (7R\*,10R\*)-8-(3-methoxyphenyl)-5-(phenylsulfonyl)-9-(phenylthio)-10-(*p*-tolyl)-5,6,7,10-tetrahydrocyclohepta[b]indole-7-carboxylate (8o):**

The reaction of 3-propargyl-2-alkenyl indole **6o** (100 mg, 0.169 mmol), thiophenol (43 μL, 0.424 mmol) and AIBN (28 mg, 0.169 mmol) in dry toluene (10 mL) as described for compound **8b**, followed by purification of the crude reaction mixture on silica gel column chromatography by using EtOAc:Petroleum ether as eluent furnished the product **8o** (44 mg, 43%) as a sticky solid.

**Physical appearance:** sticky solid.

**R<sub>f</sub>:** 0.2 (1:9, EtOAc:Petroleum ether).

**IR (neat):** 3027, 1738, 1582, 1376, 755 cm<sup>-1</sup>.

**<sup>1</sup>H NMR (500 MHz, CDCl<sub>3</sub>):** δ 8.29 (d, *J* = 8.5 Hz, 1H),

7.82 (d, *J* = 8.0 Hz, 2H), 7.57 (t, *J* = 7.5 Hz, 1H), 7.48 (t, *J* = 8.0 Hz, 2H), 7.31–7.23 (m, 3H), 7.14 (d, *J* = 7.5 Hz, 3H), 7.04 (d, *J* = 8.0 Hz, 2H), 7.00 (t, *J* = 7.5 Hz, 1H), 6.92 (t, *J* = 7.0 Hz, 1H), 6.83 (d, *J* = 8.0 Hz, 2H), 6.34–6.68 (m, 2H), 6.56 (d, *J* = 5.7 Hz, 1H), 6.49 (t, *J* = 7.5 Hz, 1H), 4.99 (s, 1H), 4.05–4.02 (m, 1H), 3.83 (s, 3H), 3.68 (q, *J* = 7.0 Hz, 2H), 3.63–3.60 (m, 2H), 2.30 (s, 3H), 0.83 (t, *J* = 7.0 Hz, 3H).

**<sup>13</sup>C NMR (125 MHz, CDCl<sub>3</sub>, DEPT):** δ 171.3 (C), 159.2 (C), 141.2 (C), 140.6 (C), 139.1 (C), 138.6 (C), 138.5 (C), 136.4 (C), 136.2 (C), 135.4 (C), 134.0 (CH), 134.0 (C), 131.5 (2 × CH),

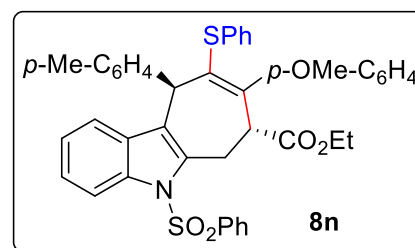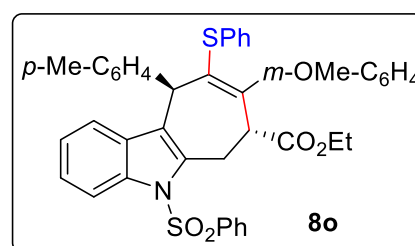



130.7 (C), 129.4 (3 × CH), 129.4 (2 × CH), 129.0 (CH), 128.8 (2 × CH), 127.0 (CH), 126.5 (2 × CH), 126.4 (3 × CH), 124.9 (CH), 123.9 (CH), 122.3 (C), 118.2 (CH), 114.9 (CH), 112.8 (CH), 60.7 (CH<sub>2</sub>), 55.4 (CH<sub>3</sub>), 46.1 (CH), 43.2 (CH), 29.6 (CH<sub>2</sub>), 21.1 (CH<sub>3</sub>), 13.6 (CH<sub>3</sub>).

**HRMS (ESI, M+H<sup>+</sup>):** m/z calcd. for C<sub>42</sub>H<sub>38</sub>NO<sub>5</sub>S<sub>2</sub> is 700.2186 found 700.2186.

*ethyl* (7*R*\*,10*R*\*)-8,10-diphenyl-5-(phenylsulfonyl)-9-(*p*-tolylthio)-5,6,7,10-tetrahydrocyclohepta[*b*]indole-7-carboxylate (**8p**):

The reaction of 3-propargyl-2-alkenyl indole **6h** (129 mg, 0.236 mmol), 4-methyl thiophenol (73 mg, 0.591 mmol) and AIBN (39 mg, 0.236 mmol) in dry toluene (12 mL) as described for compound **8b**, followed by purification of the crude reaction mixture on silica gel column chromatography by using EtOAc: Petroleum ether as eluent furnished cyclohepta[*b*]indole derivative **8p** (96 mg, 60%) as a sticky solid.

**Physical appearance:** sticky solid.

**R<sub>f</sub>:** 0.5 (4:6, DCM:Petroleum ether).

**IR (neat):** 3027, 1733, 1491, 1447, 1376, 1174, 756 cm<sup>-1</sup>.

**<sup>1</sup>H NMR (400 MHz, CDCl<sub>3</sub>):** δ 8.29 (d, *J* = 8.4 Hz, 1H), 7.82 (d,

*J* = 7.6 Hz, 2H), 7.58 (t, *J* = 7.2 Hz, 1H), 7.48 (t, *J* = 7.6 Hz, 2H), 7.36-7.19 (m, 9H), 7.15 (d, *J* = 6.8 Hz, 2H), 7.08-6.97 (m, 2H) 6.77 (d, *J* = 8.0 Hz, 2H), 6.51 (d, *J* = 8.0 Hz, 2H), 5.00 (s, 1H), 3.98 (dd, *J* = 10.8, 5.6, Hz, 1H), 3.66-3.54 (m, 4H), 2.09 (s, 3H), 0.77 (t, *J* = 7.2 Hz, 3H).

**<sup>13</sup>C NMR (100 MHz, CDCl<sub>3</sub>, DEPT):** δ 171.4 (C), 141.9 (C), 140.0 (C), 139.5 (C), 139.3 (C), 139.2 (C), 137.6 (C), 136.1 (C), 135.4 (C), 134.0 (CH), 132.5 (2 × CH), 130.7 (C), 129.9 (C), 129.6 (2 × CH), 129.4 (2 × CH), 129.1 (CH), 128.7 (2 × CH), 127.9 (2 × CH), 127.8 (CH), 126.7 (CH), 126.5 (2 × CH), 126.4 (3 × CH), 124.8 (CH), 123.5 (CH), 122.0 (C), 118.2 (CH), 114.8 (CH), 60.6 (CH<sub>2</sub>), 45.9 (CH), 42.9 (CH), 29.6 (CH<sub>2</sub>), 21.0 (CH<sub>3</sub>), 13.5 (CH<sub>3</sub>).

**HRMS (ESI, M+Na<sup>+</sup>):** m/z calcd. for C<sub>41</sub>H<sub>35</sub>NNaO<sub>4</sub>S<sub>2</sub> 692.1900, found 692.1899.

*ethyl* (7*R*\*,10*R*\*)-8,10-diphenyl-5-(phenylsulfonyl)-9-(*o*-tolylthio)-5,6,7,10-tetrahydrocyclohepta[*b*]indole-7-carboxylate (**8q**):

The reaction of 3-propargyl-2-alkenyl indole **6h** (56 mg, 0.1023 mmol), with 2-methylthiophenol (30 μL, 0.2557 mmol) and AIBN (17 mg, 0.1023 mmol) in dry toluene (8 mL) as described for compound **8b**, followed by purification of crude product on silica gel column chromatography by using EtOAc:Petroleum ether as eluent furnished cyclohepta[*b*]indole derivative **8q** (29 mg, 42%) as a sticky solid.

**Physical appearance:** sticky solid.

**R<sub>f</sub>:** 0.4 (5:5, DCM:Petroleum ether).

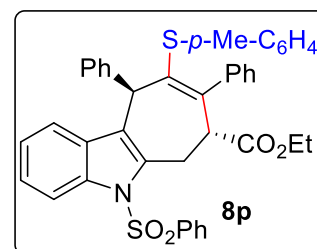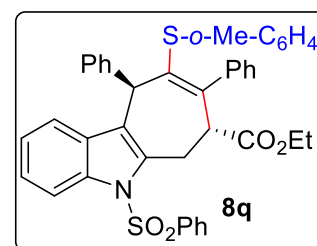

**IR (neat):** 2926, 1733, 1448, 1377, 1217, 1174, 1029, 756 cm<sup>-1</sup>.

**<sup>1</sup>H NMR (500 MHz, CDCl<sub>3</sub>):** δ 8.29 (d, *J* = 8.5 Hz, 1H), 7.83 (d, *J* = 7.5 Hz, 2H), 7.58 (t, *J* = 7.5 Hz, 1H), 7.48 (t, *J* = 8.0 Hz, 2H), 7.35-7.20 (m, 9H), 7.15 (d, *J* = 7.0 Hz, 2H), 6.99-6.90 (m, 3H), 6.77 (d, *J* = 7.5 Hz, 1H), 6.56 (t, *J* = 7.0 Hz, 1H), 6.44 (d, *J* = 7.5 Hz, 1H), 4.90 (s, 1H), 3.97 (dd, *J* = 11.0, 5.0 Hz, 1H), 3.66-3.56 (m, 4H), 1.82 (s, 3H), 0.78 (t, *J* = 7.5 Hz, 3H).

**<sup>13</sup>C NMR (125 MHz, CDCl<sub>3</sub>, DEPT):** δ 171.5 (C), 141.9 (C), 140.9 (C), 139.5 (C), 139.3 (2 × C), 138.9 (C), 136.0 (C), 135.2 (C), 134.0 (CH), 133.9 (CH), 132.4 (2 × C), 130.6 (2 × CH), 129.4 (2 × CH), 128.9 (CH), 128.7 (2 × CH), 128.2 (CH), 127.9 (2 × CH), 127.9 (CH), 126.7 (CH), 126.6 (2 × CH), 126.5 (2 × CH), 126.4 (CH), 124.9 (CH), 123.8 (CH), 121.3 (C), 118.1 (CH), 114.7 (CH), 60.7 (CH<sub>2</sub>), 46.0 (CH), 42.5 (CH), 29.6 (CH<sub>2</sub>), 20.5 (CH<sub>3</sub>), 13.6 (CH<sub>3</sub>).

**HRMS (ESI, M+K<sup>+</sup>):** *m/z* calcd. for C<sub>41</sub>H<sub>35</sub>KNO<sub>4</sub>S<sub>2</sub>, 708.1639, found 708.1639.

**ethyl (7*R*\*,10*R*\*)-9-((4-methoxyphenyl)thio)-8,10-diphenyl-5-(phenylsulfonyl)-5,6,7,10-tetrahydrocyclohepta[*b*]indole-7-carboxylate (8*r*):**

The reaction of 3-propargyl-2-alkenyl indole **6h** (64 mg, 0.117 mmol), with and 4-methoxythiophenol (36 μL, 0.293 mmol) and AIBN (19 mg, 0.117 mmol) in dry toluene (7 mL) as described for compound **8b**, followed by purification of crude product on silica gel column chromatography by using EtOAc:Petroleum ether as eluent furnished cyclohepta[*b*]indole derivative **8r** (36 mg, 45%) as a sticky solid.

**Physical appearance:** sticky solid.

**R<sub>f</sub>:** 0.3 (3:7, DCM:Petroleum ether).

**IR (neat):** 3024, 2932, 2837, 1732, 1592, 1492, 1376, 1248, 1029, 756 cm<sup>-1</sup>.

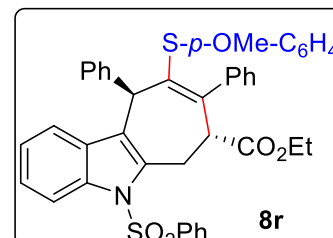

**<sup>1</sup>H NMR (400 MHz, CDCl<sub>3</sub>):** δ 8.27 (d, *J* = 8.0 Hz, 1H), 7.82 (d, *J* = 8.0 Hz, 2H), 7.58 (t, *J* = 8.0 Hz, 1H), 7.48 (t, *J* = 8.0 Hz, 2H), 7.34-7.16 (m, 11H), 7.01 (t, *J* = 8.0 Hz, 2H), 6.83 (d, *J* = 8.0 Hz, 2H), 6.53 (d, *J* = 8.0 Hz, 1H), 6.25 (d, *J* = 8.0 Hz, 2H), 5.00 (s, 1H), 3.96 (d, *J* = 8.0 Hz, 1H), 3.61-3.55 (m, 6H), 0.75 (t, *J* = 8.0 Hz, 3H).

**<sup>13</sup>C NMR (100 MHz, CDCl<sub>3</sub>, DEPT):** δ 171.5 (C), 159.5 (C), 142.0 (C), 140.1 (C), 139.3 (C), 139.2 (C), 139.0 (C), 136.1 (C), 135.5 (C), 134.7 (2 × CH), 134.0 (CH), 130.9 (C), 129.4 (3 × CH), 128.7 (2 × CH), 128.0 (2 × CH), 127.8 (CH), 126.7 (CH), 126.5 (2 × CH), 126.5 (3 × CH), 124.8 (CH), 123.9 (C), 123.7 (CH), 121.9 (C), 118.1 (CH), 114.8 (CH), 114.5 (2 × CH), 60.7 (CH<sub>2</sub>), 55.3 (CH<sub>3</sub>), 46.0 (CH), 42.6 (CH), 29.7 (CH<sub>2</sub>), 13.6 (CH<sub>3</sub>).

**HRMS (ESI, M+K<sup>+</sup>):** *m/z* calcd. for C<sub>41</sub>H<sub>35</sub>KNO<sub>5</sub>S<sub>2</sub>, 724.1588, found 724.1582.



*ethyl (7R\*,10R\*)-9-(naphthalen-1-ylthio)-8,10-diphenyl-5-(phenylsulfonyl)-5,6,7,10-tetrahydrocyclohepta[b]indole-7-carboxylate (8s):*

The reaction of 3-propargyl-2-alkenyl indole **6h** (127 mg, 0.233 mmol), naphthol (93 mg, 0.582 mmol) and AIBN (38 mg, 0.233 mmol) in dry toluene (12 mL) as described for compound **8b**, followed by purification of crude product on silica gel column chromatography by using EtOAc:Petroleum ether as eluent furnished cyclohepta[b]indole derivative **8s** (97 mg, 59%) as a crystalline solid.

**Physical appearance:** crystalline solid.

**MP.:** 192-193 °C.

**R<sub>f</sub>:** 0.4 (3:7, DCM:Petroleum ether).

**IR (neat):** 3058, 3028, 1737, 1447, 1376, 1173, 756 cm<sup>-1</sup>.

**<sup>1</sup>H NMR (500 MHz, CDCl<sub>3</sub>):** δ 8.27 (d, *J* = 8.5 Hz, 1H), 7.89 (d, *J* = 7.5 Hz, 2H), 7.59-7.49 (m, 4H), 7.38-7.15 (m, 15H), 6.89 (dd, *J* = 8.5, 1.5 Hz, 1H), 6.76 (d, *J* = 8.5 Hz, 1H), 6.59 (t, *J* = 7.5 Hz, 1H), 6.28 (d, *J* = 7.5 Hz, 1H), 5.13 (s, 1H), 4.06 (dd, *J* = 13.0, 3.5 Hz, 1H), 3.76-3.61 (m, 4H), 0.80 (t, *J* = 7.0 Hz, 3H).

**<sup>13</sup>C NMR (125 MHz, CDCl<sub>3</sub>, DEPT):** δ 171.4 (C), 141.9 (C), 141.7 (C), 139.3 (C), 139.2 (C), 138.5 (C), 136.0 (C), 135.4 (C), 134.1 (CH), 133.5 (C), 132.0 (C), 131.5 (C), 130.5 (C), 130.2 (CH), 129.5 (2 × CH), 129.0 (CH), 128.7 (2 × CH), 128.5 (CH), 128.3 (CH), 128.0 (2 × CH), 127.9 (CH), 127.5 (CH), 127.0 (CH), 126.8 (CH), 126.6 (2 × CH), 126.5 (2 × CH), 126.4 (2 × CH), 126.0 (CH), 124.8 (CH), 123.7 (CH), 121.9 (C), 118.0 (CH), 114.7 (CH), 60.7 (CH<sub>2</sub>), 46.2 (CH), 43.4 (CH), 29.6 (CH<sub>2</sub>), 13.6 (CH<sub>3</sub>).

**HRMS (ESI, M+Na<sup>+</sup>):** *m/z* calcd. for C<sub>44</sub>H<sub>35</sub>NNaO<sub>4</sub>S<sub>2</sub>, 728.1900, found 728.1898.

*ethyl (7R\*,10R\*)-9-((perfluorophenyl)thio)-8,10-diphenyl-5-(phenylsulfonyl)-5,6,7,10-tetrahydrocyclohepta[b]indole-7-carboxylate (8t):*

The reaction of 3-propargyl-2-alkenyl indole **6h** (131 mg, 0.240 mmol), with and penta fluorothiophenol (74 μL, 0.600 mmol) and AIBN (39 mg, 0.240 mmol) in dry toluene (12 mL) as described for compound **8b**, followed by purification of crude product on silica gel column chromatography by using EtOAc:Petroleum ether as eluent furnished cyclohepta[b]indole derivative **8t** (130 mg, 72%) as a sticky solid and **10t** (19 mg, 11%) as a white solid.

**Physical appearance:** sticky solid.

**R<sub>f</sub>:** 0.9 (1:9, EtOAc:Petroleum ether).

**IR (neat):** 3031, 1738, 1510, 1488, 1449, 1378, 1173, 981, 756 cm<sup>-1</sup>.

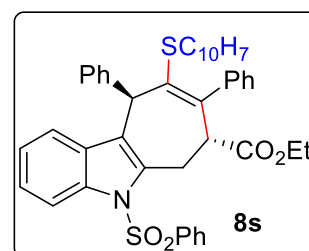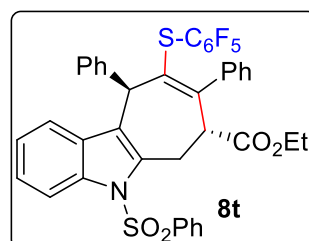

**<sup>1</sup>H NMR (400 MHz, CDCl<sub>3</sub>):** δ 8.33 (d, *J* = 8.4 Hz, 1H), 7.85 (d, *J* = 7.2 Hz, 2H), 7.63-7.59 (m, 1H), 7.51 (t, *J* = 8.0 Hz, 2H), 7.37-7.23 (m, 9H), 7.12 (t, *J* = 7.2 Hz, 1H), 7.05 (bs, 2H), 6.74 (d, *J* = 8.0 Hz, 1H), 4.87 (s, 1H), 4.02 (dd, *J* = 13.6, 3.6 Hz, 1H), 3.68-3.59 (m, 3H), 3.45 (dd, *J* = 18.8, 13.6 Hz, 1H), 0.76 (t, *J* = 7.2 Hz, 3H).

**<sup>13</sup>C NMR (100 MHz, CDCl<sub>3</sub>, DEPT):** δ 170.9 (C), 148.5 (2 × C), 145.9 (C), 143.3 (C), 141.0 (C), 139.2 (C), 138.8 (C), 136.1 (C), 135.3 (C), 135.0 (C), 134.0 (CH), 129.7 (C), 129.5 (3 × CH), 129.0 (2 × CH), 128.5 (C), 128.3 (2 × C), 128.1 (CH), 128.1 (2 × CH), 127.2 (CH), 126.6 (3 × CH), 126.4 (2 × CH), 125.3 (CH), 123.7 (CH), 118.9 (C), 116.3 (CH), 115.0 (CH), 107.7 (C), 60.8 (CH<sub>2</sub>), 45.8 (CH), 44.5 (CH), 29.0 (CH<sub>2</sub>), 13.5 (CH<sub>3</sub>).

**<sup>19</sup>F NMR (CDCl<sub>3</sub>, 470.5 MHz):** δ -131.4 (dd, *J*<sub>F-F</sub> = 23.5, 4.7 Hz), -151.7 (t, *J*<sub>F-F</sub> = 37.0 Hz), -160.9 (td, *J*<sub>F-F</sub> = 23.5, 4.7 Hz).

**HRMS (ESI, M+Na<sup>+</sup>):** *m/z* calcd. for C<sub>40</sub>H<sub>28</sub>F<sub>5</sub>NNaO<sub>4</sub>S<sub>2</sub> 768.1272 found 768.1267.

*ethyl* (6*S*\*,7*R*\*,10*R*\*)-6-(2-cyanopropan-2-yl)-9-((perfluorophenylthio)-8,10-diphenyl-5-(phenylsulfonyl)-5,6,7,10-tetrahydrocyclohepta[b]indole-7-carboxylate (**10t**):

**Physical appearance:** white solid.

**MP.:** 212-214 °C.

**R<sub>f</sub>:** 0.8 (1:9, EtOAc:Petroleum ether).

**IR (neat):** 3012, 1737, 1511, 1488, 1090, 757 cm<sup>-1</sup>.

**<sup>1</sup>H NMR (500 MHz, CDCl<sub>3</sub>):** δ 8.27 (d, *J* = 8.5 Hz, 1H), 7.83 (d,

*J* = 7.5 Hz, 2H), 7.54 (t, *J* = 7.0 Hz, 1H), 7.44 (t, *J* = 8.0 Hz, 2H), 7.39-7.32 (m, 9H), 7.16-7.10 (m, 2H), 6.79 (d, *J* = 7.5 Hz, 1H), 5.01-4.97 (m, 2H), 4.32 (d, *J* = 10.5 Hz, 1H), 3.76-3.65 (m, 2H), 1.32 (s, 3H), 1.24 (s, 3H), 0.96 (t, *J* = 7.0 Hz, 3H).

**<sup>13</sup>C NMR (125 MHz, CDCl<sub>3</sub>, DEPT):** δ 171.2 (C), 147.9 (2 × C), 145. (C), 140.0 (C), 139.7 (C), 139.2 (C), 138.7 (C), 138.5 (C), 136.5 (2 × C), 135.9 (C), 134.9 (C), 134.0 (CH), 130.6 (C), 129.4 (2 × CH), 129.3 (3 × CH), 128.1 (CH), 128.0 (3 × CH), 127.9 (CH), 127.6 (2 × CH), 127.4 (C), 127.0 (2 × CH), 126.0 (CH), 124.3 (CH), 117.2 (CH), 116.5 (CH), 61.6 (CH<sub>2</sub>), 51.9 (CH), 45.3 (CH), 43.6 (CH), 39.3 (C), 27.4 (CH<sub>3</sub>), 27.2 (CH<sub>3</sub>), 13.7 (CH<sub>3</sub>).

**<sup>19</sup>F NMR (CDCl<sub>3</sub>, 376.5 MHz):** δ -131.0 (dd, *J*<sub>F-F</sub> = 22.6, 7.5 Hz), -151.8 (t, *J*<sub>F-F</sub> = 22.6 Hz), -160.7 (td, *J*<sub>F-F</sub> = 26.4, 7.53 Hz).

**HRMS (ESI, M+H<sup>+</sup>):** *m/z* calcd. for C<sub>44</sub>H<sub>34</sub>F<sub>5</sub>N<sub>2</sub>O<sub>4</sub>S<sub>2</sub> 813.1875 found 813.1871.

*ethyl* (7*R*\*,10*R*\*)-9-((2-bromophenylthio)-8,10-diphenyl-5-(phenylsulfonyl)-5,6,7,10-tetrahydrocyclohepta[b]indole-7-carboxylate (**8u**):

The reaction of 3-propargyl-2-alkenyl indole **6h** (53 mg, 0.097 mmol), 2-bromothiophenol (29 μL, 0.242 mmol) and AIBN (16 mg, 0.097 mmol) in dry toluene (7 mL) as described for

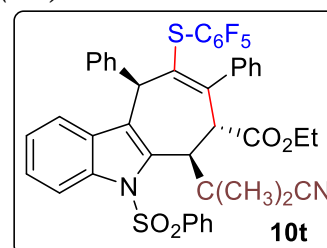

compound **8b**, followed by purification of crude product on silica gel column chromatography by using EtOAc:Petroleum ether as eluent furnished cyclohepta[b]indole derivative **8u** (30 mg, 42%) and **10u** (23 mg, 30%) as a pale yellow solid.

**Physical appearance:** pale yellow solid.

**MP.:** 190-192 °C.

**R<sub>f</sub>:** 0.3 (1:9, EtOAc:Petroleum ether).

**IR (neat):** 3059, 1737, 1447, 1376, 1174, 754 cm<sup>-1</sup>.

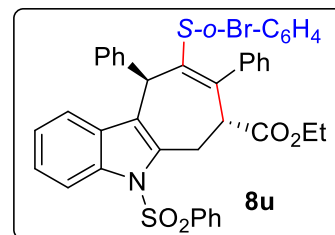

**<sup>1</sup>H NMR (400 MHz, CDCl<sub>3</sub>):** δ 8.31 (d, *J* = 8.0 Hz, 1H), 7.86 (d, *J* = 8.0 Hz, 2H), 7.58 (t, *J* = 8.0 Hz, 1H), 7.48 (t, *J* = 8.0 Hz, 2H), 7.35-7.30 (m, 4H), 7.28-7.21 (m, 6H), 7.14-7.12 (m, 2H), 7.01 (t, *J* = 8.0 Hz, 1H), 6.79-6.73 (m, 2H), 6.62 (d, *J* = 8.0 Hz, 1H), 6.35 (t, *J* = 8.0 Hz, 1H), 4.94 (s, 1H), 4.02 (dd, *J* = 8.0, 4.0 Hz, 1H), 3.68-3.57 (m, 4H), 0.78 (t, *J* = 8.0 Hz, 3H).

**<sup>13</sup>C NMR (100 MHz, CDCl<sub>3</sub>, DEPT):** δ 171.3 (C), 143.1 (C), 141.5 (C), 139.4 (C), 139.2 (C), 137.6 (C), 136.2 (C), 135.4 (C), 135.3 (C), 134.0 (CH), 133.3 (CH), 133.0 (CH), 130.5 (C), 129.5 (3 × CH), 128.8 (2 × CH), 128.4 (CH), 128.0 (CH), 128.0 (2 × CH), 127.5 (CH), 126.9 (CH), 126.7 (2 × CH), 126.6 (3 × CH), 126.2 (C), 125.0 (CH), 123.9 (CH), 121.6 (C), 118.1 (CH), 114.9 (CH), 60.8 (CH<sub>2</sub>), 46.2 (CH), 44.0 (CH), 29.5 (CH<sub>2</sub>), 13.6 (CH<sub>3</sub>).

**HRMS (ESI, M+2):** *m/z* calcd. for C<sub>40</sub>H<sub>33</sub>BrNO<sub>4</sub>S<sub>2</sub> 736.1006 found 736.1006.

*ethyl (6S\*,7R\*,10R\*)-9-((2-bromophenyl)thio)-6-(2-cyanopropan-2-yl)-8,10-diphenyl-5-(phenylsulfonyl)-5,6,7,10-tetrahydrocyclohepta[b]indole-7-carboxylate (10u):*

**Physical appearance:** pale yellow solid.

**MP.:** 241-243 °C.

**R<sub>f</sub>:** 0.6 (1:9, EtOAc:Petroleum ether).

**IR (neat):** 3059, 1738, 1446, 1376, 1186, 754 cm<sup>-1</sup>.

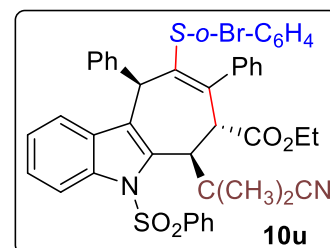

**<sup>1</sup>H NMR (400 MHz, CDCl<sub>3</sub>):** δ 8.29 (d, *J* = 8.0 Hz, 1H), 7.85 (d, *J* = 8.0 Hz, 2H), 7.47 (t, *J* = 8.0 Hz, 1H), 7.41-7.35 (m, 9H), 7.30-7.26 (m, 5H), 7.06 (t, *J* = 8.0 Hz, 1H), 6.77-6.71 (m, 2H), 6.17 (d, *J* = 4.0 Hz, 1H), 5.91 (t, *J* = 8.0 Hz, 1H), 5.13 (d, *J* = 12.0 Hz, 1H), 5.00 (s, 1H), 4.31 (d, *J* = 12.0 Hz, 1H), 3.72-3.57 (m, 2H), 1.38 (s, 3H), 1.06 (s, 3H), 0.96 (t, *J* = 8.0 Hz, 3H).

**<sup>13</sup>C NMR (100 MHz, CDCl<sub>3</sub>, DEPT):** δ 171.5 (C), 141.5 (C), 140.5 (C), 139.6 (C), 138.9 (C), 138.0 (C), 136.3 (C), 135.3 (C), 134.9 (C), 134.1 (CH), 133.2 (CH), 132.7 (CH), 131.7 (C), 130.9 (C), 129.3 (3 × CH), 129.2 (2 × CH), 128.2 (CH), 128.0 (CH), 127.8 (2 × CH), 127.6 (CH), 127.4 (CH), 127.2 (2 × CH), 127.1 (3 × CH), 125.8 (CH), 125.7 (C), 124.7 (CH), 124.4 (C), 118.8 (CH), 116.7 (CH), 61.4 (CH<sub>2</sub>), 51.6 (CH), 43.9 (CH), 43.8 (CH), 39.3 (C), 27.6 (CH<sub>3</sub>), 26.5 (CH<sub>3</sub>), 13.6 (CH<sub>3</sub>).

**HRMS (ESI, M+H<sup>+</sup>):** m/z calcd. for C<sub>44</sub>H<sub>38</sub>BrN<sub>2</sub>O<sub>4</sub>S<sub>2</sub> 801.1451, found 801.1466.

**diethyl (4S\*,5R\*)-1,3-diphenyl-2-(phenylthio)-5,6-dihydro-4H-pyrido[3,2,1-jk]carbazole-4,5-dicarboxylate (16):**

Oven dried two necked RB was charged with indole derivative **15** (80 mg, 0.159 mmol) under nitrogen atmosphere then toluene (3 mL) was added to this. In another RB a solution of thiophenol (48  $\mu$ L, 0.476 mmol) and AIBN (34 mg, 0.207 mmol) in toluene (10 mL) was prepared. Then solution of indole derivative was kept at 110 °C and to this a solution of thiophenol and AIBN in toluene was added dropwise over a period of 2h by using syringe pump. After the completion of reaction (monitored by TLC), solvent was evaporated under reduced pressure and the crude reaction mixture was subjected to purification by silica gel column chromatography using CH<sub>2</sub>Cl<sub>2</sub>:Petroleum ether (20:80) as eluent furnished dihydropyrrole **16** (49 mg, 50%) as a sticky solid.

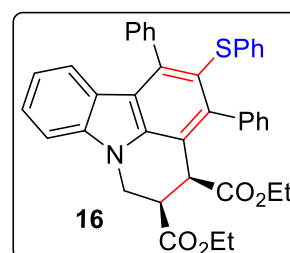

**Physical appearance:** sticky solid.

**R<sub>f</sub>:** 0.4 (3:7, DCM:Petroleum ether).

**IR (neat):** 3022, 2933, 1734, 1475, 1373, 1216, 1025, 755 cm<sup>-1</sup>.

**<sup>1</sup>H NMR (500 MHz, CDCl<sub>3</sub>):**  $\delta$  7.45-7.37 (m, 5H), 7.34-7.33 (m, 1H), 7.30-7.27 (m, 3H), 7.24-7.21 (m, 1H), 7.11 (d, *J* = 7.5 Hz, 1H), 7.07-7.06 (m, 1H), 6.98-6.91 (m, 4H), 6.79 (d, *J* = 8.0 Hz, 1H), 6.65 (d, *J* = 7.5 Hz, 2H), 4.65 (dd, *J* = 17.5, 5.0 Hz, 1H), 4.84 (t, *J* = 12.0 Hz, 1H), 4.32 (d, *J* = 3.0 Hz, 1H), 4.29-4.20 (m, 2H), 4.05-3.93 (m, 2H), 3.34 (dt, *J* = 12.0, 4.5 Hz, 1H), 1.30 (t, *J* = 7.5 Hz, 3H), 1.11 (t, *J* = 7. Hz, 3H).

**<sup>13</sup>C NMR (125 MHz, CDCl<sub>3</sub>, DEPT):**  $\delta$  171.3 (C), 170.9 (C), 144.0 (C), 143.0 (C), 141.3 (2  $\times$  C), 140.6 (C), 139.9 (C), 139.0 (C), 137.3 (C), 130.6 (CH), 129.12 (CH), 129.11 (CH), 129.06 (CH), 128.3 (CH), 128.2 (C), 128.1 (2  $\times$  CH), 127.7 (CH), 127.6 (CH), 127.4 (CH), 127.2 (CH), 126.8 (2  $\times$  CH), 126.2 (CH), 124.5 (CH), 123.0 (CH), 122.7 (CH), 120.9 (C), 120.7 (C), 119.8 (CH), 115.7 (CH), 108.6 (CH), 61.6 (CH<sub>2</sub>), 61.4 (CH<sub>2</sub>), 42.7 (CH), 41.9 (CH), 39.6 (CH<sub>2</sub>), 14.3 (CH<sub>3</sub>), 14.1 (CH<sub>3</sub>).

**HRMS (ESI, M+H<sup>+</sup>):** m/z calcd. for C<sub>39</sub>H<sub>34</sub>NO<sub>4</sub>S 612.2203 found 612.2210.

**(7R\*,10R\*)-8,10-diphenyl-9-(phenylthio)-5,6,7,10-tetrahydrocyclohepta[b]indole-7-carboxylic acid (17):**

To a solution of compound **8h** (123 mg, 0.187 mmol) in EtOH:H<sub>2</sub>O (1:1) (16 mL) was added 10% NaOH solution and reaction mixture was allowed to reflux for overnight. After the completion of reaction, the solution was neutralized with dilute HCl and extracted with EtOAc,

dried over anhydrous Na<sub>2</sub>SO<sub>4</sub> and combine organic layer was evaporated under reduced pressure. The crude reaction mixture was subjected to purification using silica gel column chromatography to furnish product **17** (67 mg, 73%) as a sticky solid.

**Physical appearance:** sticky solid.

**R<sub>f</sub>:** 0.1 (2:8, EtOAc:Petroleum ether).

**IR (neat):** 3395, 3058, 2919, 1712, 1460, 1218, 755 cm<sup>-1</sup>.

**<sup>1</sup>H NMR (100 MHz, CDCl<sub>3</sub>):** δ 7.99 (bs, 1H), 7.42 (d, *J* = 6.8 Hz, 2H), 7.33 (d, *J* = 7.6 Hz, 1H), 7.27-7.14 (m, 8H), 7.12-7.06 (m, 4H), 6.95 (t, *J* = 7.6 Hz, 3H), 6.80 (d, *J* = 7.6 Hz, 1H), 5.24 (s, 1H), 4.13 (d, *J* = 12.8 Hz, 1H), 3.39 (t, *J* = 14.8 Hz, 1H), 3.14 (d, *J* = 17.2 Hz, 1H).

**<sup>13</sup>C NMR (100 MHz, CDCl<sub>3</sub>, DEPT):** δ 176.1 (C), 143.4 (C), 140.9 (C), 139.3 (C), 137.9 (C), 134.9 (C), 133.8 (C), 133.0 (C), 132.0 (3 × CH), 129.2 (CH), 129.0 (3 × CH), 128.6 (C), 128.5 (2 × CH), 128.1 (2 × CH), 127.8 (CH), 127.2 (CH), 126.8 (2 × CH), 126.5 (CH), 121.8 (CH), 119.7 (CH), 118.1 (CH), 112.6 (C), 110.3 (CH), 46.1 (CH), 42.8 (CH), 27.6 (CH<sub>2</sub>).

**HRMS (ESI, M+H<sup>+</sup>):** m/z calcd. for C<sub>32</sub>H<sub>26</sub>NO<sub>2</sub>S 488.1679 found 488.1677.

**(7R\*,10R\*)-5-formyl-N,N-dimethyl-8,10-diphenyl-9-(phenylthio)-5,6,7,10-tetrahydrocyclohepta[b]indole-7-carboxamide(18):**

To a solution of compound **17** (55 mg, 0.113 mmol) in dry CH<sub>2</sub>Cl<sub>2</sub> (4 mL) was added oxalyl chloride (49 μL, 0.564 mmol), a drop of DMF (7 μL) at 0 °C and reaction mixture was allowed to stirred at room temperature for 2 h. After the completion of reaction solvent was evaporated using vacuum pump under N<sub>2</sub> condition. The residue was dissolved in dry CH<sub>2</sub>Cl<sub>2</sub> (4 mL) and to this AlCl<sub>3</sub> (30 mg, 0.225) was added at 0 °C, reaction mixture was allowed to stirred overnight. After the completion solvent was evaporate under reduce pressure and crude reaction mixture was subjected to purification using silica gel column chromatography to furnish **18** (30 mg, 49%) as a sticky solid.

**Physical appearance:** sticky solid.

**R<sub>f</sub>:** 0.2 (2:8, EtOAc:Petroleum ether).

**IR (neat):** 3027, 2930, 1703, 1650, 1460, 1359, 750 cm<sup>-1</sup>.

**<sup>1</sup>H NMR (400 MHz, CDCl<sub>3</sub>):** δ 9.47 (s, 1H), 8.44 (bs, 1H), 7.47 (d, *J* = 8.0 Hz, 2H), 7.36-7.27 (m, 6H), 7.24-7.22 (m, 3H), 7.15 (d, *J* = 7.2 Hz, 2H), 7.07-7.01 (m, 2H), 6.93 (t, *J* = 7.6 Hz, 2H), 6.55 (d, *J* = 8.0 Hz, 1H), 5.19 (s, 1H), 4.20 (dd, *J* = 12.4, 2.8 Hz, 1H), 3.72 (t, *J* = 17.2 Hz, 1H), 3.44 (d, *J* = 16.8 Hz, 1H), 2.39 (s, 3H), 2.08 (s, 3H).

**<sup>13</sup>C NMR (100 MHz, CDCl<sub>3</sub>, DEPT):** δ 170.7 (C), 158.6 (CH), 141.6 (C), 140.4 (C), 139.2 (C), 138.3 (C), 134.2 (C), 133.3 (C), 132.4 (2 × CH), 130.0 (C), 129.2 (3 × CH), 128.6 (4 ×

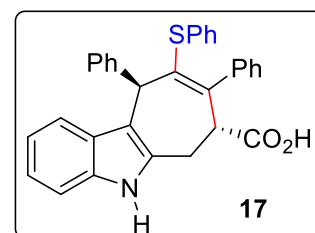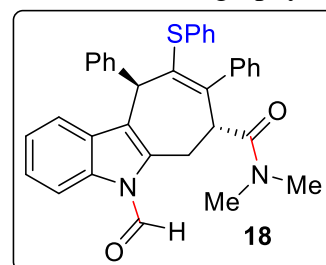

CH), 128.2 (CH), 127.9 (CH), 127.7 (CH), 127.2 (3 × CH), 127.0 (CH), 125.3 (CH), 124.3 (CH), 118.7 (C), 117.8 (CH), 115.9 (C), 43.7 (CH), 42.8 (CH), 35.9 (CH<sub>3</sub>), 35.3 (CH<sub>3</sub>), 28.6 (CH<sub>2</sub>).

**HRMS (ESI, M+H<sup>+</sup>):** m/z calcd. for C<sub>35</sub>H<sub>31</sub>N<sub>2</sub>O<sub>2</sub>S 543.2092 found 543.2091.

**ethyl** **2-((1R\*,3R\*,E)-4-methyl-2-((phenylthio)methylene)-1-(p-tolyl)-1,2,3,4-tetrahydrocyclopenta[b]indol-3-yl)acetate (19):**

To a solution of compound **17** (110 mg, 0.226 mmol) in dry CH<sub>2</sub>Cl<sub>2</sub> (6 mL) was added oxalyl chloride (97 μL, 1.129 mmol) at 0 °C and reaction mixture was allowed to stirred at room temperature for 2 h. After the completion of reaction solvent was evaporated using vacuum pump under N<sub>2</sub> condition. The residue was dissolved in dry CH<sub>2</sub>Cl<sub>2</sub> (5 mL) and to this AlCl<sub>3</sub> (60 mg, 0.452) was added at 0 °C, reaction mixture was allowed to stirred for 20 mint. After the completion solvent was evaporate under reduce pressure and crude reaction mixture was subjected to purification using silica gel column chromatography to furnish **19** (20 mg, 19%) as a sticky solid.

**Physical appearance:** sticky solid.

**R<sub>f</sub>:** 0.5 (3:7, EtOAc:Petroleum ether).

**IR (neat):** 3222, 3059, 2932, 1660, 1473, 1452, 755 cm<sup>-1</sup>.

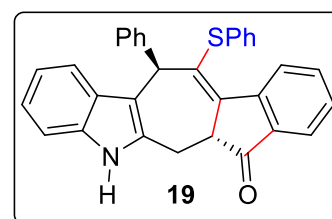

**<sup>1</sup>H NMR (400 MHz, CDCl<sub>3</sub>):** δ 9.18 (bs, 1H), 8.03-8.01 (m, 1H), 7.45 (dd, *J* = 8.0, 4.0 Hz, 1H), 7.36 (d, *J* = 4.0 Hz, 2H), 7.33-7.30 (m, 2H), 7.22-7.19 (m, 5H), 7.11-7.01 (m, 4H), 6.95-6.92 (m, 1H), 6.84-6.82 (m, 2H), 4.95 (dd, *J* = 8.0, 4.0 Hz, 1H), 4.55 (s, 1H), 3.48 (dd, *J* = 20.0, 8.0 Hz, 1H), 3.35 (dd, *J* = 20.0, 4.0 Hz, 1H).

**<sup>13</sup>C NMR (100 MHz, CDCl<sub>3</sub>, DEPT):** δ 194.2 (C), 165.1 (C), 148.8 (C), 145.7 (C), 143.1 (C), 142.1 (C), 141.7 (C), 139.2 (C), 135.5 (C), 130.8 (2 × CH), 129.1 (2 × CH), 128.74 (C), 128.7 (2 × CH), 128.6 (2 × CH), 127.2 (CH), 127.1 (CH), 126.9 (CH), 126.4 (CH), 124.5 (CH), 124.3 (CH), 122.8 (CH), 121.7 (C), 121.4 (CH), 119.7 (CH), 112.2 (CH), 57.8 (CH), 51.9 (CH), 28.3 (CH<sub>2</sub>).

**HRMS (ESI, M+H<sup>+</sup>):** m/z calcd. for C<sub>32</sub>H<sub>24</sub>NOS 470.1573 found 470.1575.

**ethyl** **(7R\*,10R\*)-8,10-diphenyl-9-(phenylsulfinyl)-5-(phenylsulfonyl)-5,6,7,10-tetrahydrocyclohepta[b]indole-7-carboxylate (20):**

To a solution of compound **8h** (35 mg, 0.053 mmol) in CH<sub>2</sub>Cl<sub>2</sub> (1 mL), was added *m*-CPBA (14 mg, 0.053 mmol) at 0 °C and reaction mixture was allowed to stir for 1 h. After the completion of starting material (monitored by TLC), the reaction quenched with saturated solution of NaHCO<sub>3</sub> at 0 °C and extract with CH<sub>2</sub>Cl<sub>2</sub> (3 × 20 mL). The combine organic layer was dried over anhydrous Na<sub>2</sub>SO<sub>4</sub> and evaporated under reduced pressure, crude product was

subjected to purification by silica gel column chromatography to by using EtOAc:Petroleum ether (30:70) as eluent to furnished the product **20** (20 mg, 56%) as a white sticky solid.

**Physical appearance:** white sticky solid.

**R<sub>f</sub>:** 0.2 (2:8, EtOAc:Petroleum ether).

**IR (neat):** 3022, 1737, 1599, 1447, 1375, 1174, 755, cm<sup>-1</sup>.

**<sup>1</sup>H NMR (400 MHz, CDCl<sub>3</sub>):** δ 8.14 (d, *J* = 8.0 Hz, 1H), 7.81 (d, *J* = 8.0 Hz, 2H), 7.63 (t, *J* = 8.0 Hz, 1H), 7.50 (t, *J* = 8.0 Hz, 2H), 7.43-7.35 (m, 5H), 7.25-7.18 (m, 6H), 7.08-7.05 (m, 2H), 7.01 (t, *J* = 8.0 Hz, 1H), 6.85 (d, *J* = 8.0 Hz, 1H), 6.74-6.72 (m, 3H), 5.20 (s, 1H), 4.03 (dd, *J* = 16.0, 4.0 Hz, 1H), 3.68-3.46 (m, 4H), 0.68 (t, *J* = 8.0 Hz, 3H).

**<sup>13</sup>C NMR (100 MHz, CDCl<sub>3</sub>, DEPT):** δ 170.4 (C), 149.8 (C), 147.8 (C), 142.0 (C), 141.1 (C), 139.3 (C), 136.3 (C), 135.5 (C), 134.3 (C), 134.1 (CH), 129.8 (CH), 129.5 (2 × CH), 129.3 (C), 128.8 (CH), 128.7 (2 × CH), 128.6 (2 × CH), 128.4 (2 × CH), 127.3 (2 × CH), 126.9 (CH), 126.6 (3 × CH), 124.8 (CH), 123.9 (2 × CH), 123.5 (CH), 120.2 (CH), 118.3 (CH), 114.4 (CH), 61.0 (CH<sub>2</sub>), 45.6 (CH), 35.1 (CH), 28.6 (CH<sub>2</sub>), 13.4 (CH<sub>3</sub>).

**HRMS (ESI, M+H<sup>+</sup>):** m/z calcd. for C<sub>40</sub>H<sub>34</sub>NO<sub>5</sub>S<sub>2</sub> 672.1858 found 672.1858.

*ethyl* (7*R*\*,10*R*\*)-8,10-diphenyl-5,9-bis(phenylsulfonyl)-5,6,7,10-tetrahydrocyclohepta[b]indole-7-carboxylate (**21**):

To a solution of compound **8h** (35 mg, 0.053 mmol) in CH<sub>2</sub>Cl<sub>2</sub> (1 mL), was added *m*-CPBA (28 mg, 0.106 mmol) at 0 °C and reaction mixture was allowed to stir for 1 h. After the completion of starting material (monitored by TLC), the reaction quenched with saturated solution of NaHCO<sub>3</sub> at 0 °C and extract with CH<sub>2</sub>Cl<sub>2</sub> (3 × 20 mL). The combine organic layer was dried over anhydrous Na<sub>2</sub>SO<sub>4</sub> and evaporated under reduced pressure, crude product was subjected to purification by silica gel column chromatography to by using EtOAc:Petroleum ether (30:70) as eluent to furnished the product **21** (29 mg, 80%) as a white sticky solid.

**Physical appearance:** white sticky solid.

**R<sub>f</sub>:** 0.2 (2:8, EtOAc:Petroleum ether).

**IR (neat):** 2925, 2850, 1742, 1598, 1446, 1303, 1144, 755 cm<sup>-1</sup>.

**<sup>1</sup>H NMR (400 MHz, CDCl<sub>3</sub>):** δ 8.32 (d, *J* = 8.4 Hz, 1H), 7.82 (dd, *J* = 8.4, 1.2 Hz, 2H), 7.65 (tt, *J* = 8.0, 7.6 Hz, 1H), 7.52 (t, *J* = 8.0 Hz, 2H), 7.41-7.37 (m, 2H), 7.34-7.29 (m, 6H), 7.28-7.19 (m, 5H), 7.12 (dd, *J* = 8.4, 1.2 Hz, 2H), 6.96 (t, *J* = 7.6 Hz, 2H), 6.41 (d, *J* = 5.6 Hz, 1H), 6.04 (s, 1H), 4.10 (dd, *J* = 13.6, 3.6 Hz, 1H), 3.63-3.55 (m, 2H), 3.51-3.52 (m, 2H), 0.80 (t, *J* = 7.2 Hz, 3H).

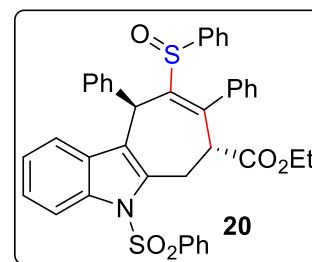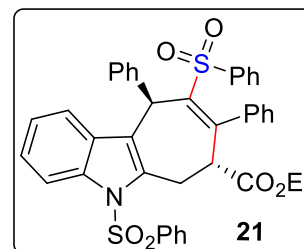



**<sup>13</sup>C NMR (100 MHz, CDCl<sub>3</sub>, DEPT):** δ 169.8 (C), 150.7 (C), 146.2 (C), 140.7 (C), 140.5 (C), 139.3 (C), 135.8 (C), 135.1 (C), 134.5 (C), 134.1 (CH), 132.6 (CH), 130.4 (C), 129.6 (2 × CH), 129.0 (2 × CH), 128.5 (4 × CH), 128.45 (CH), 127.3 (2 × CH), 127.2 (CH), 126.9 (2 × CH), 126.5 (4 × CH), 125.4 (CH), 124.2 (CH), 119.5 (C), 118.4 (CH), 114.7 (CH), 61.0 (CH<sub>2</sub>), 47.0 (CH), 38.8 (CH), 27.7 (CH<sub>2</sub>), 13.5 (CH<sub>3</sub>).

**HRMS (ESI, M+H<sup>+</sup>):** m/z calcd. for C<sub>40</sub>H<sub>34</sub>NO<sub>6</sub>S<sub>2</sub> 688.1822 found 688.1831.

*ethyl* (7R\*,10R\*)-8,10-diphenyl-5-(phenylsulfonyl)-9-(phenylthio)-5,6,7,10-tetrahydrocyclohepta[b]indole-7-carboxylate (**8h**): (Gram scale synthesis)

The reaction of 3-propargyl-2-alkenyl indole **6h** (1.0 g, 1.832 mmol), thiophenol (466 μL, 4.580 mmol) and AIBN (300 mg, 1.832 mmol) in dry toluene (60 mL) as described for compound **8b**, followed by purification of the crude reaction mixture on silica gel column chromatography by using EtOAc:Petroleum ether as eluent furnished cyclohepta[b]indole derivative **8h** (787 mg, 66%) as a sticky solid.

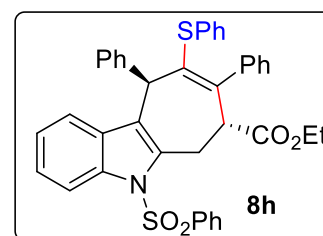

**Physical appearance:** sticky solid.

**R<sub>f</sub>:** 0.6, (1:9, EtOAc:Petroleum ether).

**IR (neat):** 3058, 3027, 2922, 1735, 1597, 1582, 1474, 1447, 1376, 1217, 1173, 754 cm<sup>-1</sup>.

**<sup>1</sup>H NMR (400 MHz, CDCl<sub>3</sub>):** δ 8.30 (d, *J* = 8.0 Hz, 1H), 7.83 (d, *J* = 8.5 Hz, 2H), 7.58 (t, *J* = 7.5 Hz, 1H), 7.47 (t, *J* = 8.0 Hz, 2H), 7.34-7.20 (m, 9H), 7.14 (d, *J* = 6.4 Hz, 2H), 7.01 (t, *J* = 7.6 Hz, 1H), 6.92 (t, *J* = 7.6 Hz, 1H), 6.84 (d, *J* = 7.6 Hz, 2H), 6.70 (t, *J* = 6.8 Hz, 2H), 6.57 (d, *J* = 7.6 Hz, 1H), 5.04 (s, 1H), 4.00 (dd, *J* = 11.5, 10 Hz, 1H), 3.69-3.58 (m, 4H), 0.79 (t, *J* = 7.5 Hz, 3H).

**<sup>13</sup>C NMR (100 MHz, CDCl<sub>3</sub>, DEPT):** δ 171.4 (C), 141.7 (C), 141.5 (C), 139.3 (C), 139.2 (C), 138.7 (C), 136.2 (C), 135.4 (C), 134.0 (CH), 133.8 (C), 131.5 (2 × CH), 130.6 (C), 129.4 (3 × CH), 129.0 (CH), 128.9 (2 × CH), 128.7 (2 × CH), 128.0 (2 × CH), 127.9 (CH), 127.1 (CH), 126.8 (CH), 126.6 (2 × CH), 126.4 (2 × CH), 124.9 (CH), 123.9 (CH), 122.1 (C), 118.2 (CH), 114.9 (CH), 60.7 (CH<sub>2</sub>), 46.1 (CH), 43.5 (CH), 29.6 (CH<sub>2</sub>), 13.6 (CH<sub>3</sub>).

**HRMS (ESI, M+K<sup>+</sup>):** m/z calcd. for C<sub>40</sub>H<sub>33</sub>KNO<sub>4</sub>S<sub>2</sub> 694.1483, found 694.1479.



SJG-NEGI-4-314-1H-PP

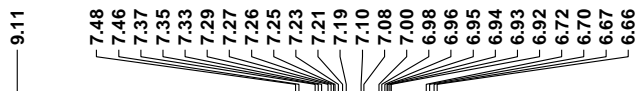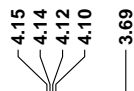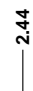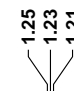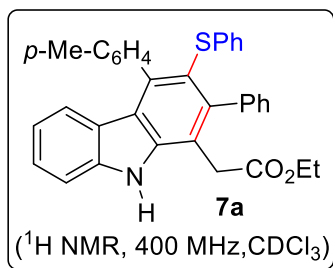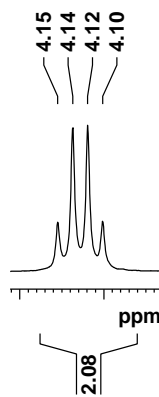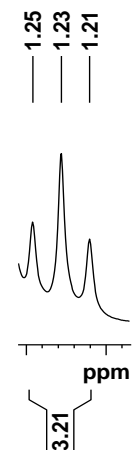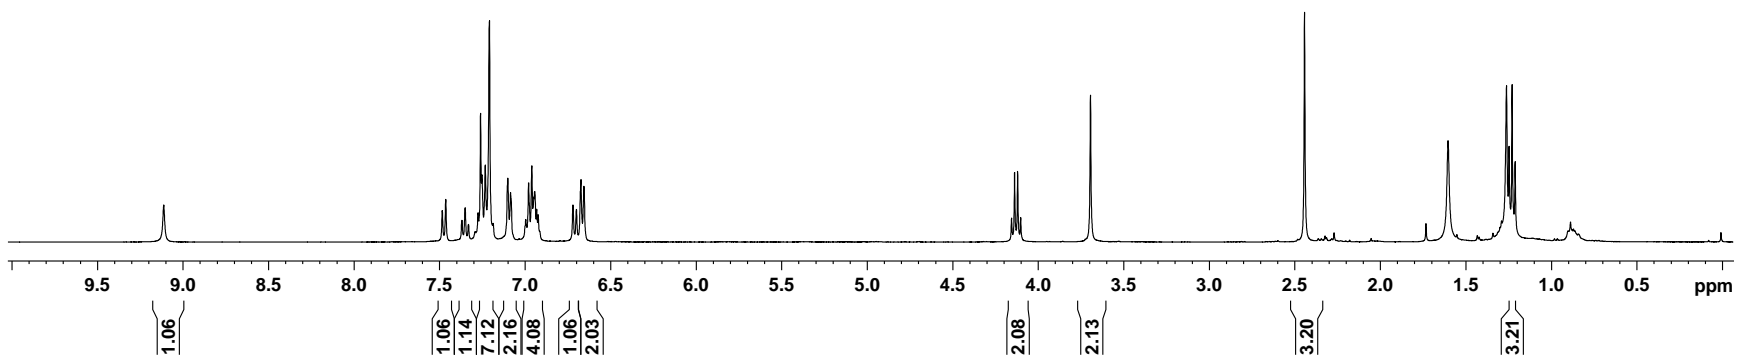

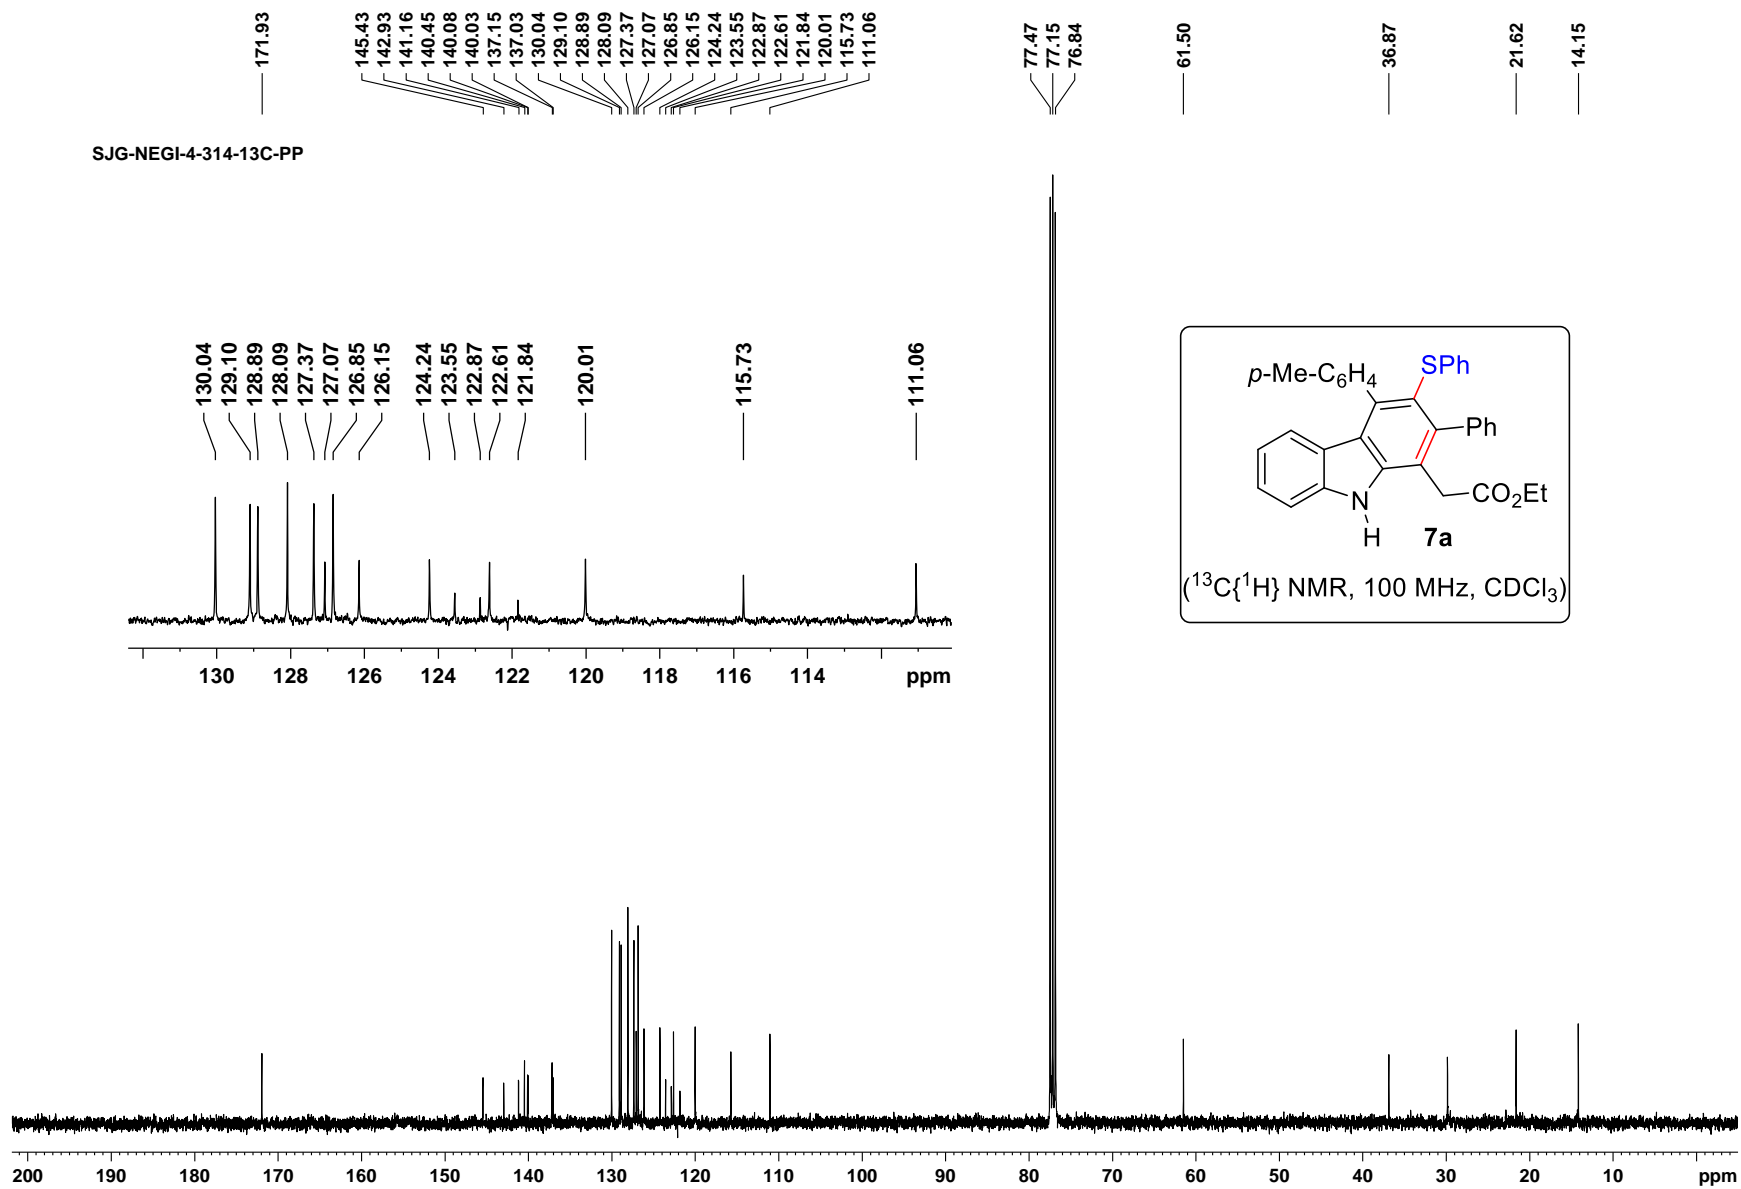

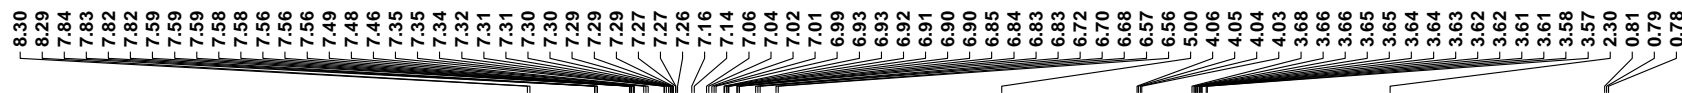

SJG-NEGI-3-237-1H,

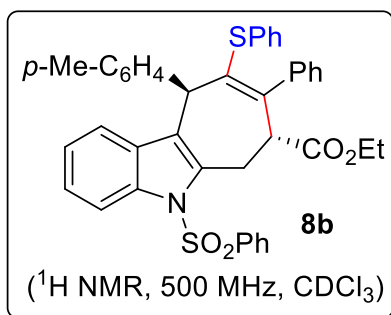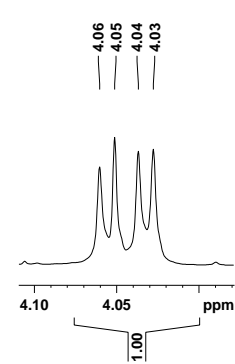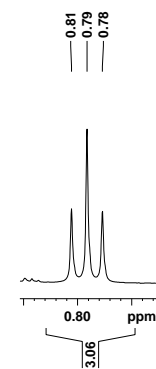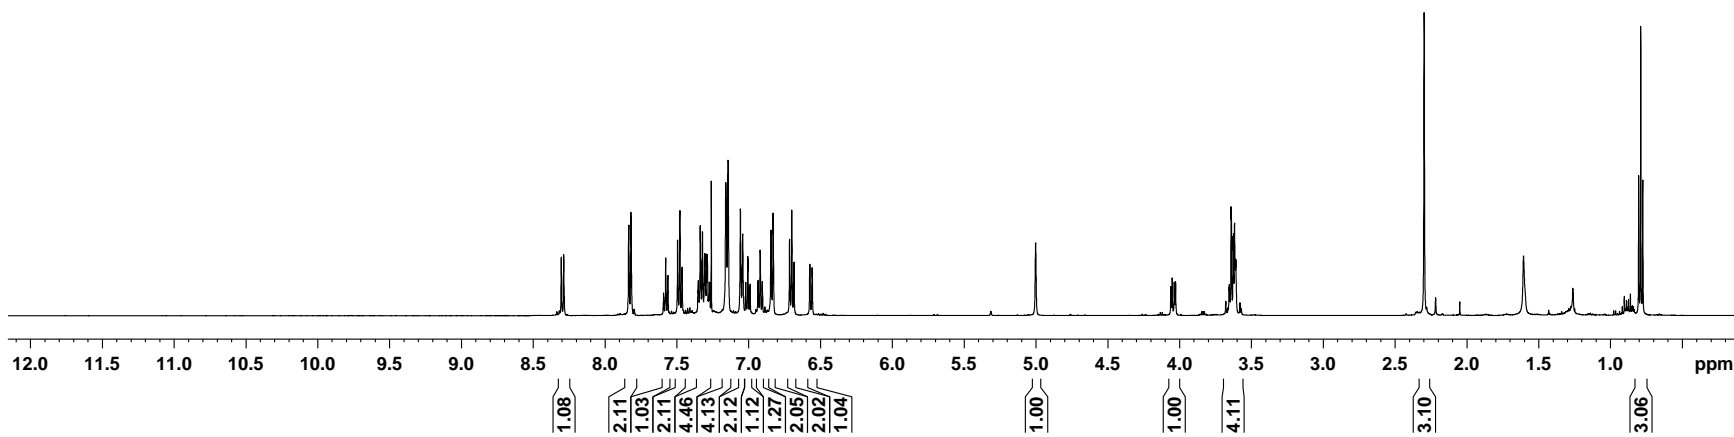



8.073  
8.052  
7.376  
7.357  
7.340  
7.314  
7.303  
7.291  
7.289  
7.285  
7.266  
7.247  
7.109  
7.104  
7.089  
7.085  
7.069  
7.050  
7.042  
7.023  
7.005  
6.927  
6.908  
6.889  
6.719  
6.699  
5.154  
4.140  
4.132  
4.109  
4.101  
3.703  
3.682  
3.673  
3.664  
3.656  
3.647  
3.638  
3.629  
3.612  
3.603  
3.578  
3.570  
3.531  
3.523  
3.121  
2.325

SJG-NEGI-F-1H

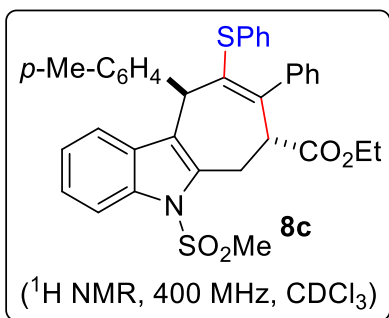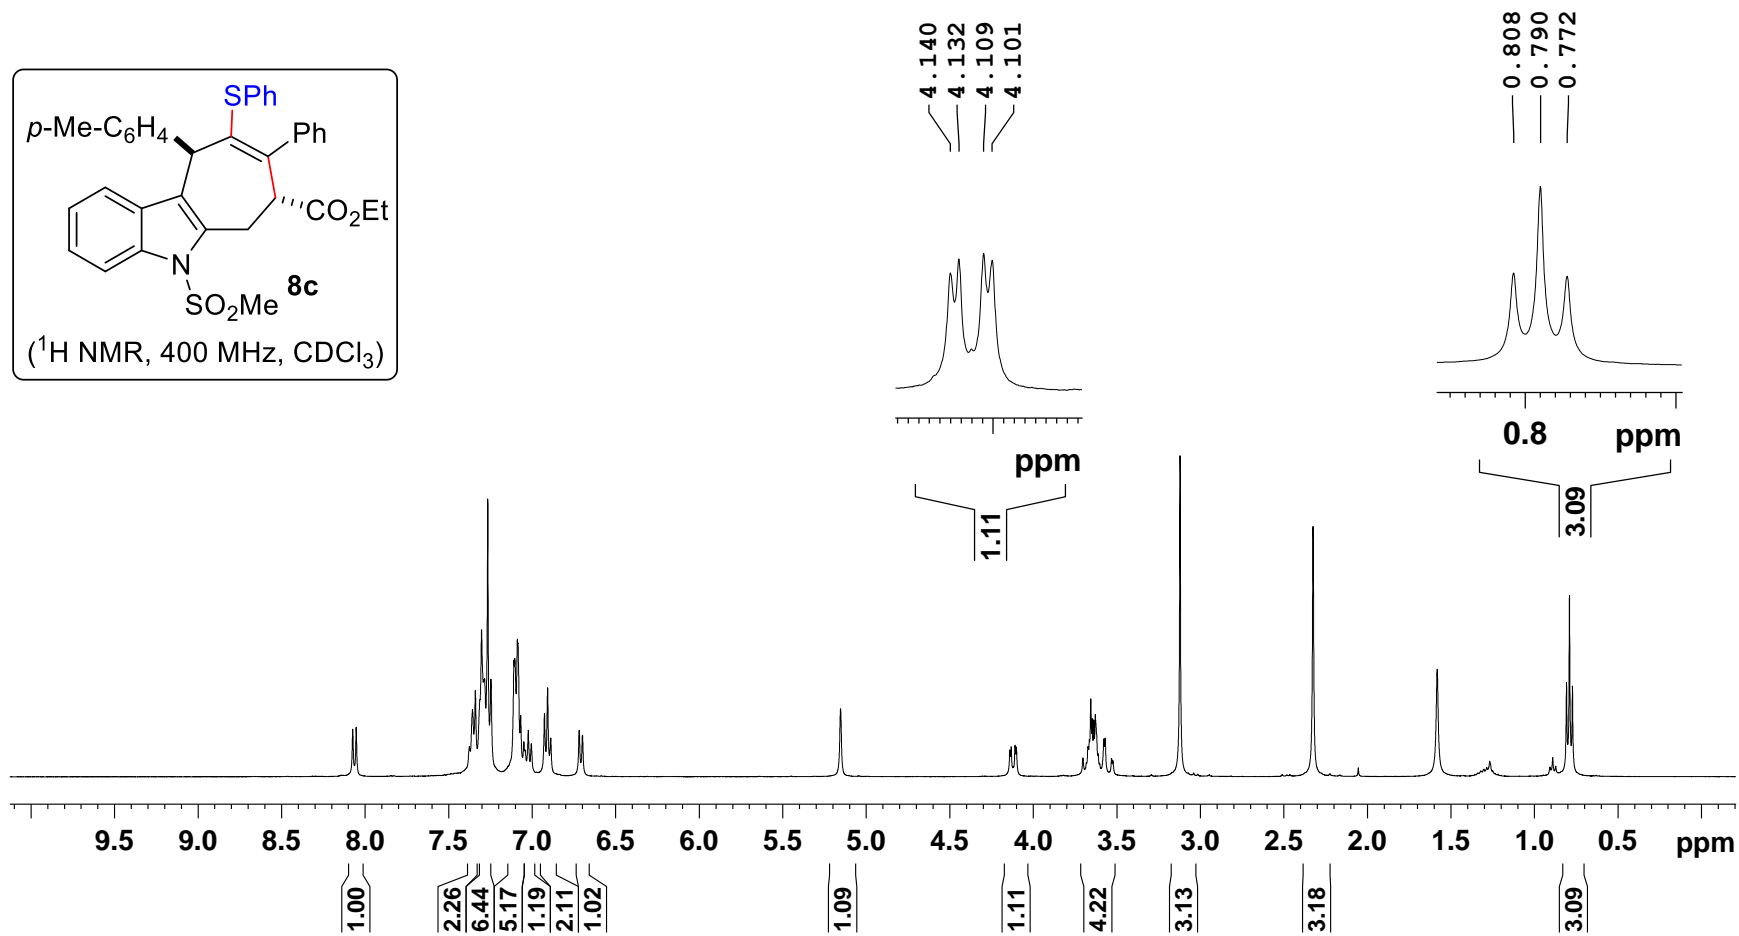

SJG-NEGI-4-351-2-13C

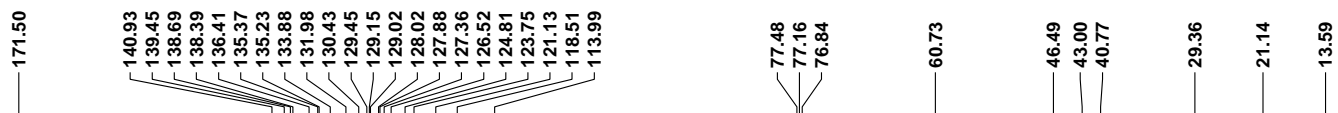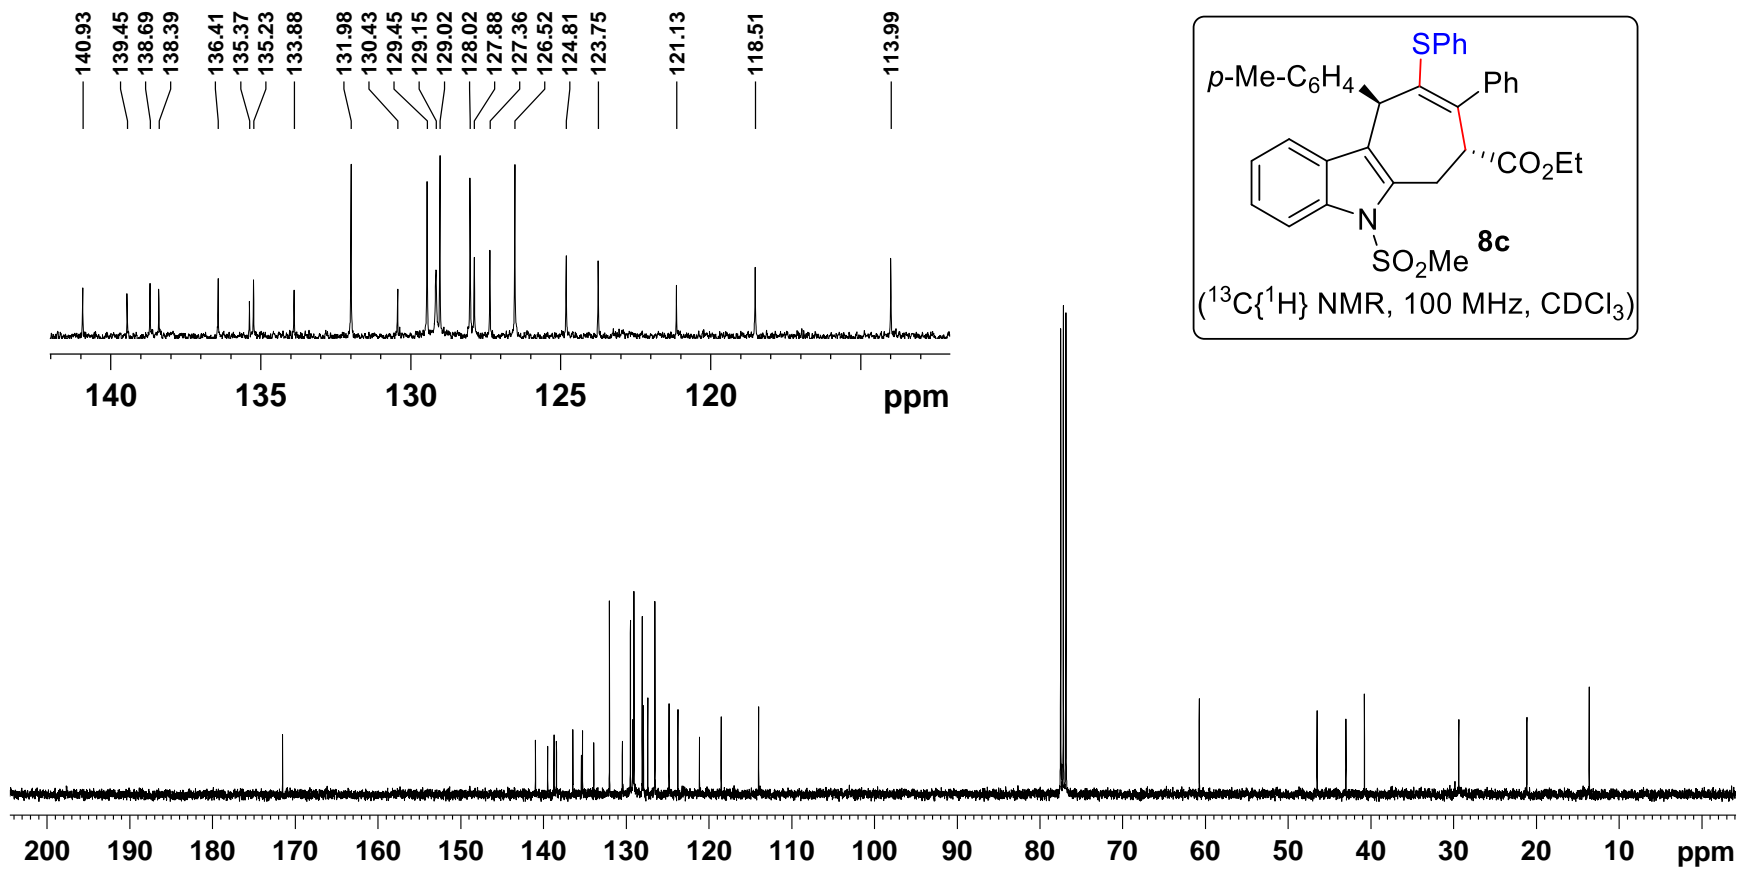

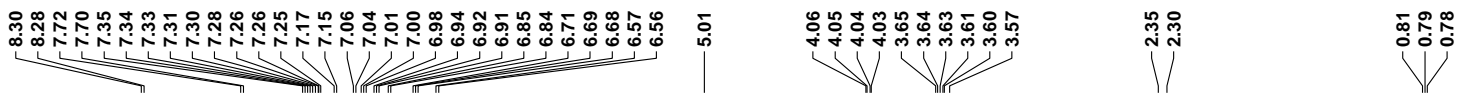

SJG-NEGI-3-263-3-1H

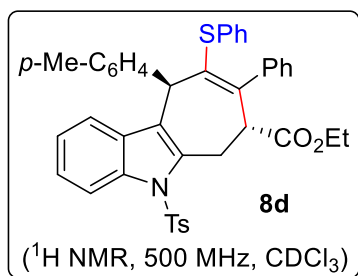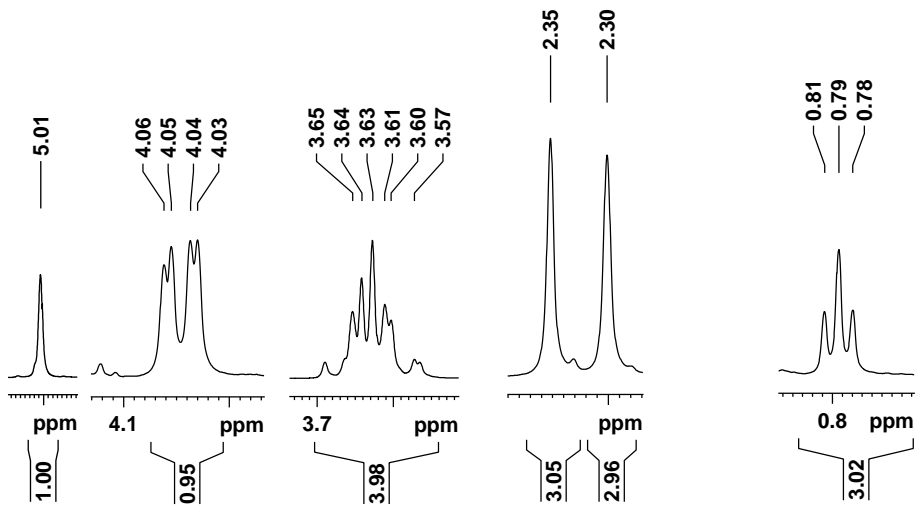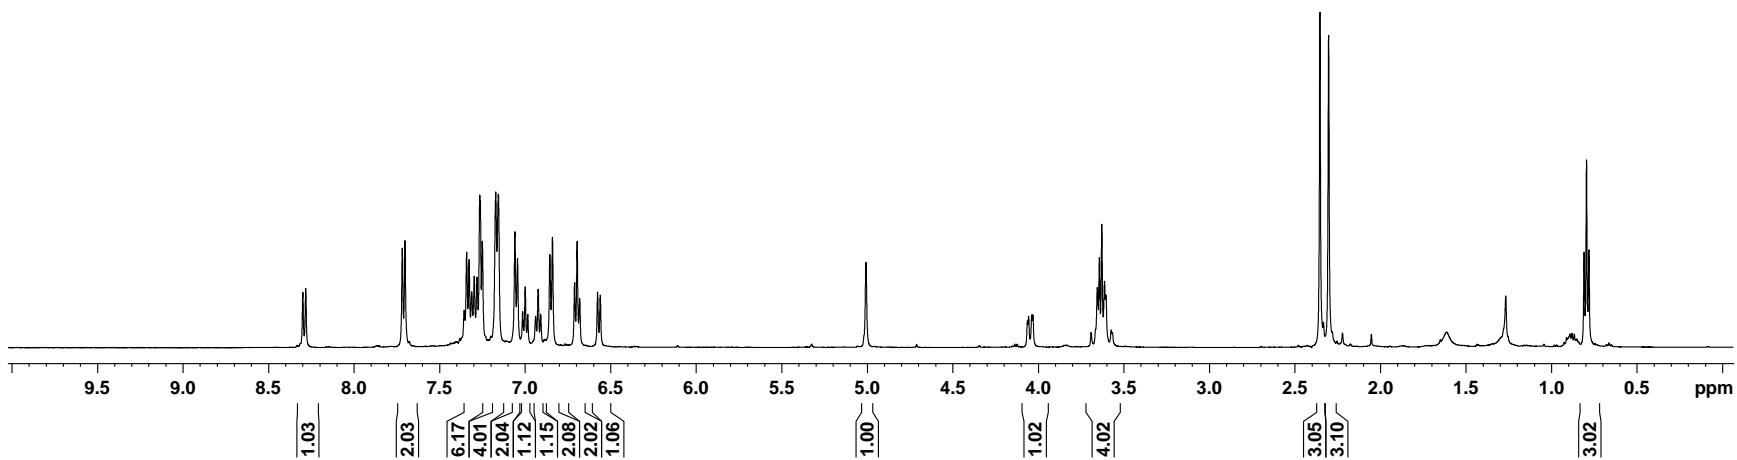

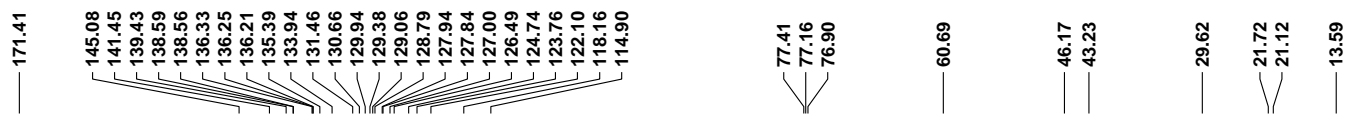

SJG-NEGI-3-263-3-13C

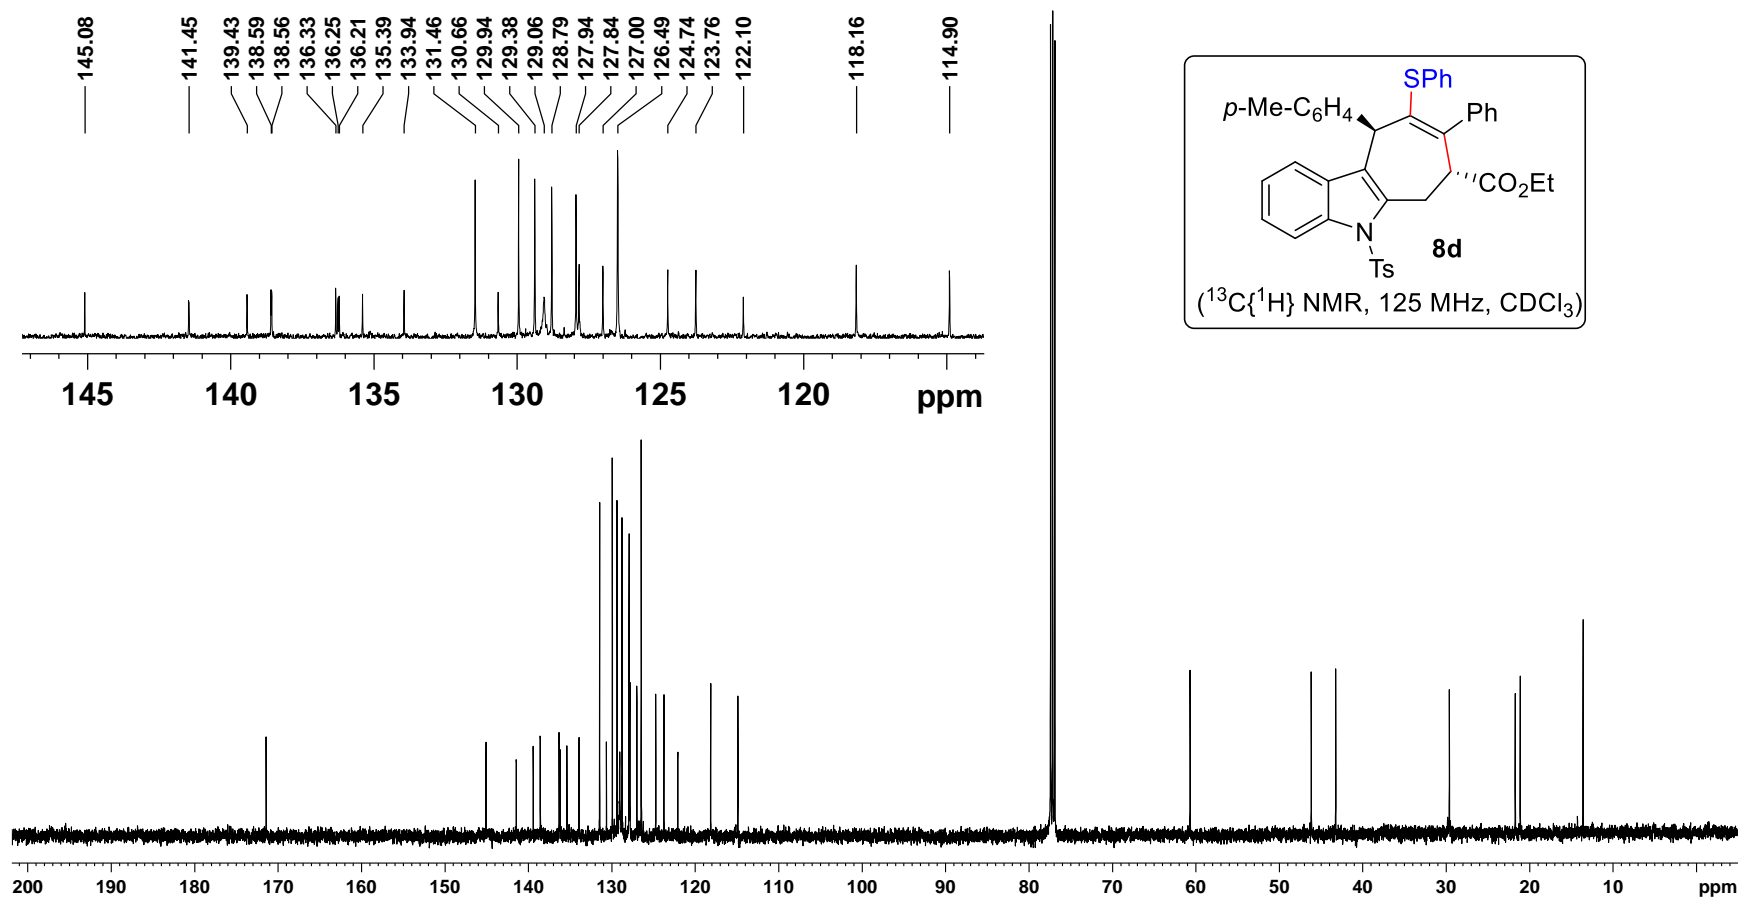



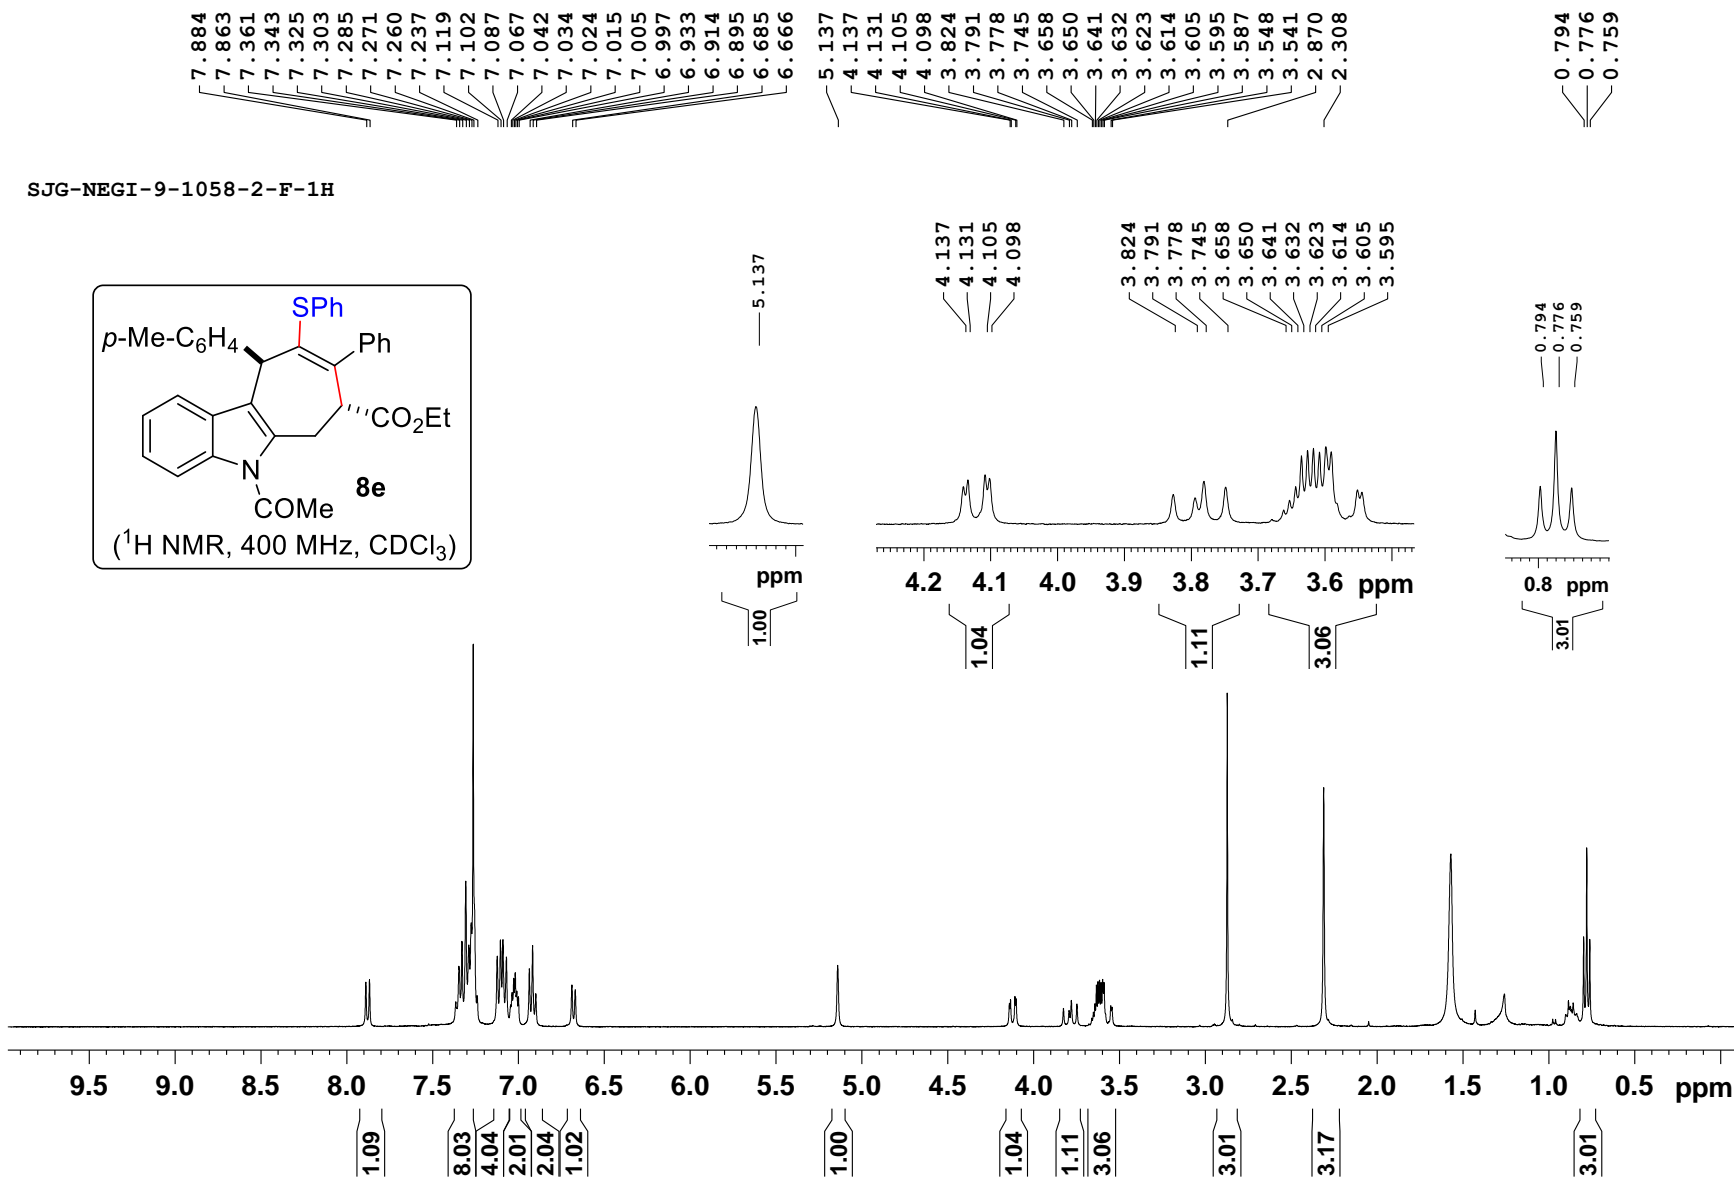

SJG-NEGI-9-1058-2-13C

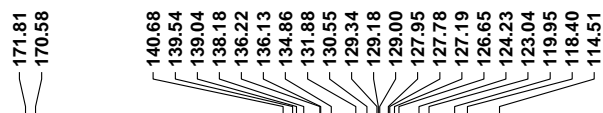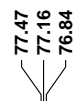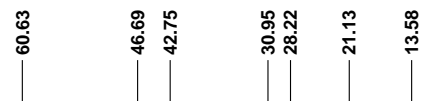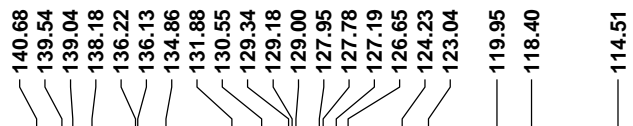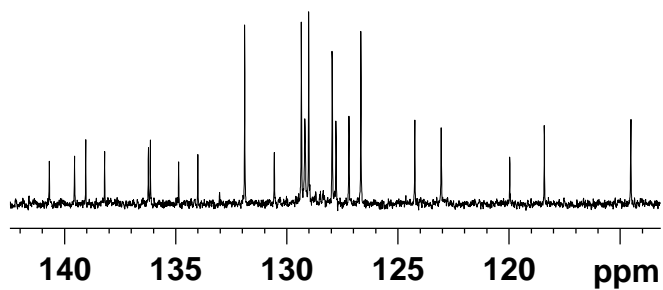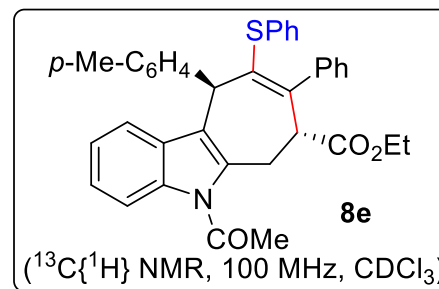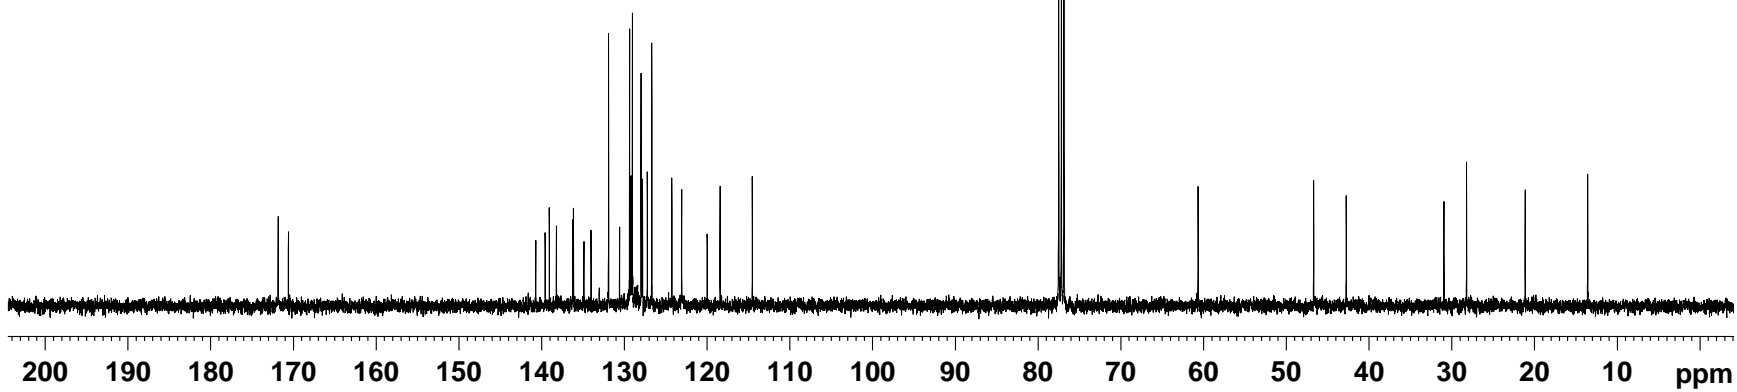

SJG-NEGI-3-267-3-1H

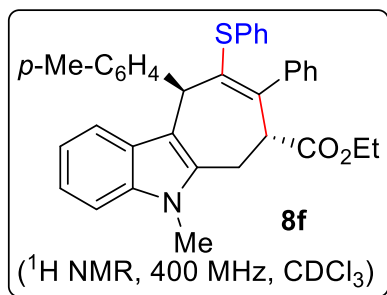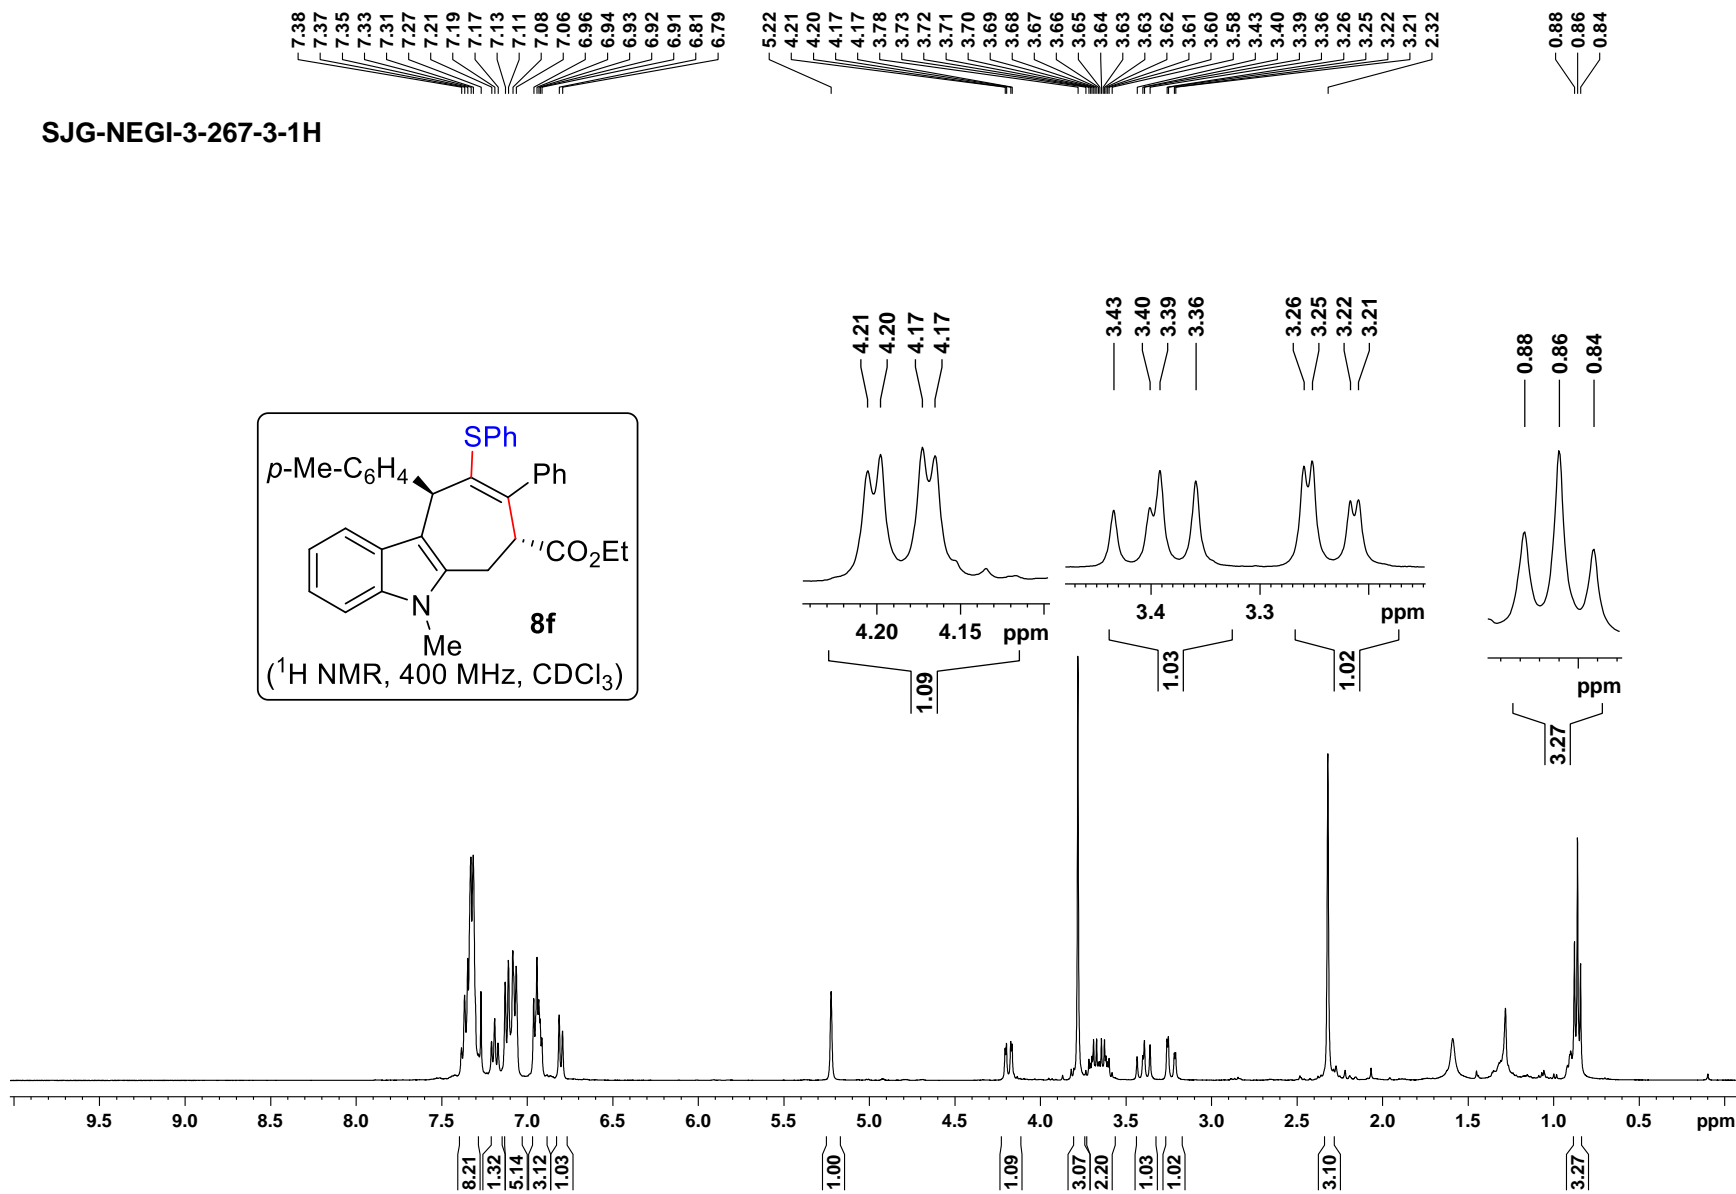

SJG-NEGI-3-267-3-13C

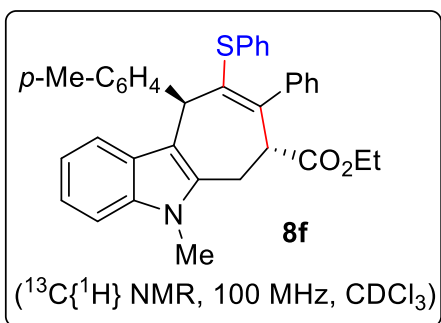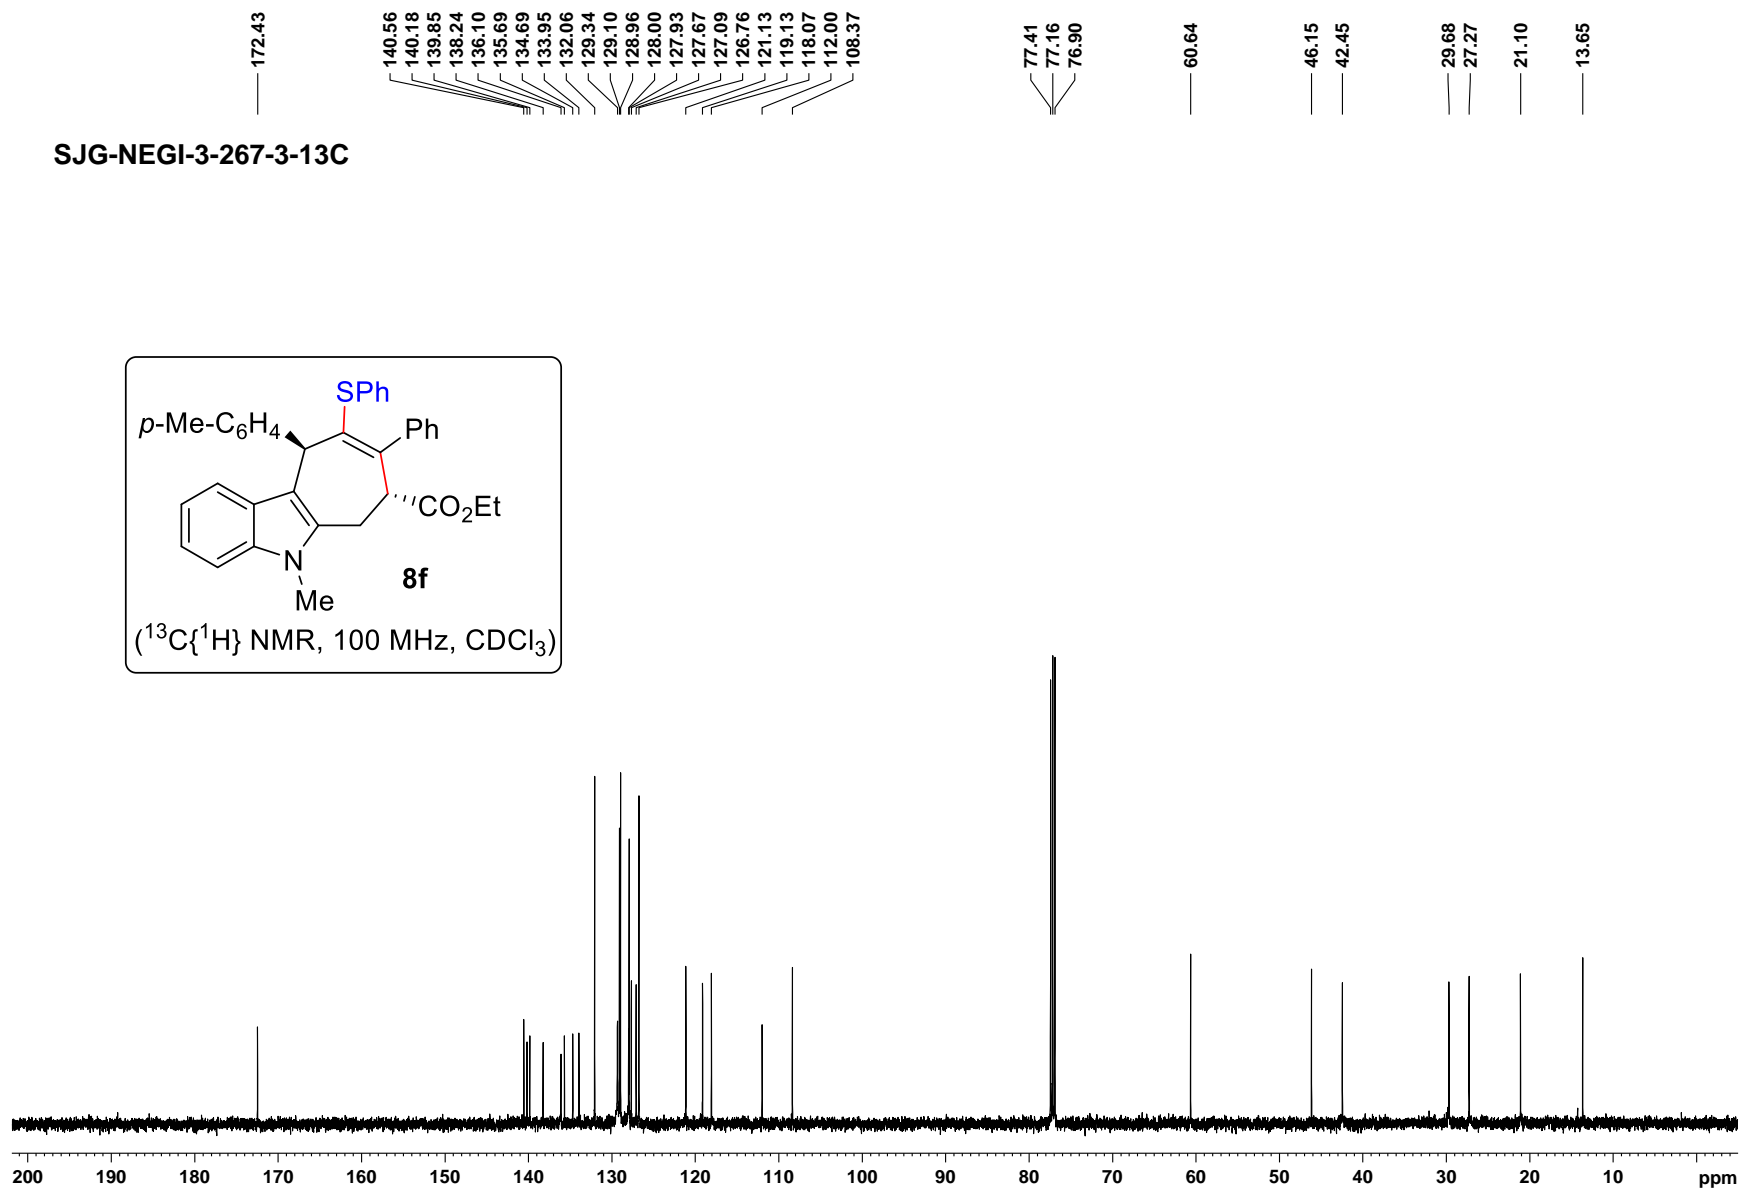

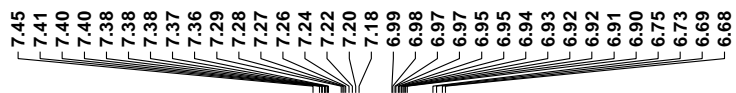

SJG-NEGI-3-267-1-1H

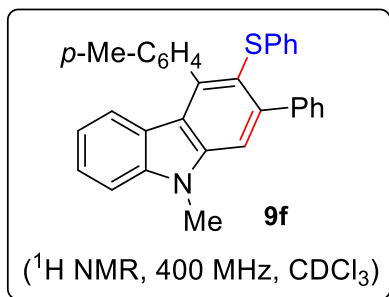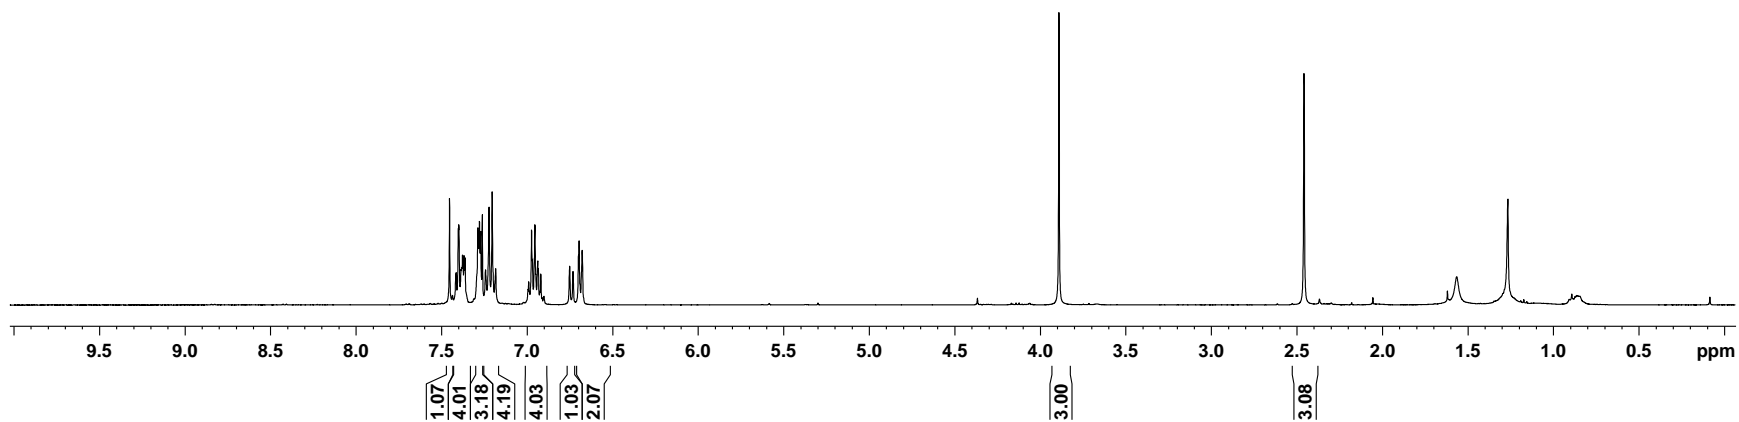

145.78  
143.86  
142.83  
141.75  
141.19  
137.20  
137.13  
129.79  
129.10  
128.92  
128.15  
127.44  
126.93  
126.90  
126.00  
124.26  
122.79  
122.56  
122.17  
120.16  
119.52  
110.46  
108.44

77.41  
77.16  
76.90

29.31

21.64

SJG-NEGI-3-267-1-13C

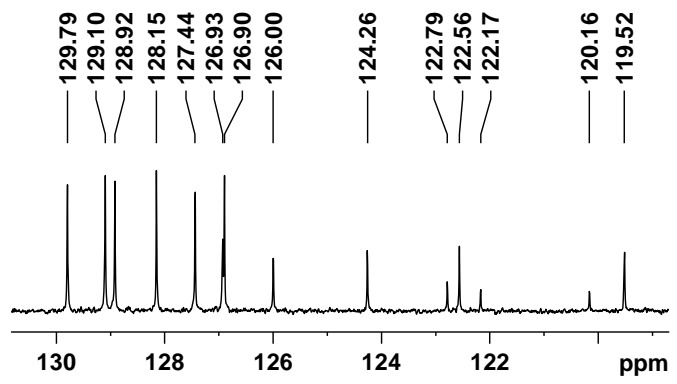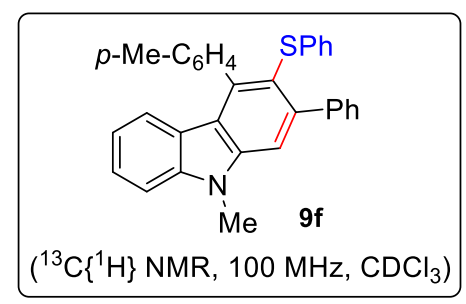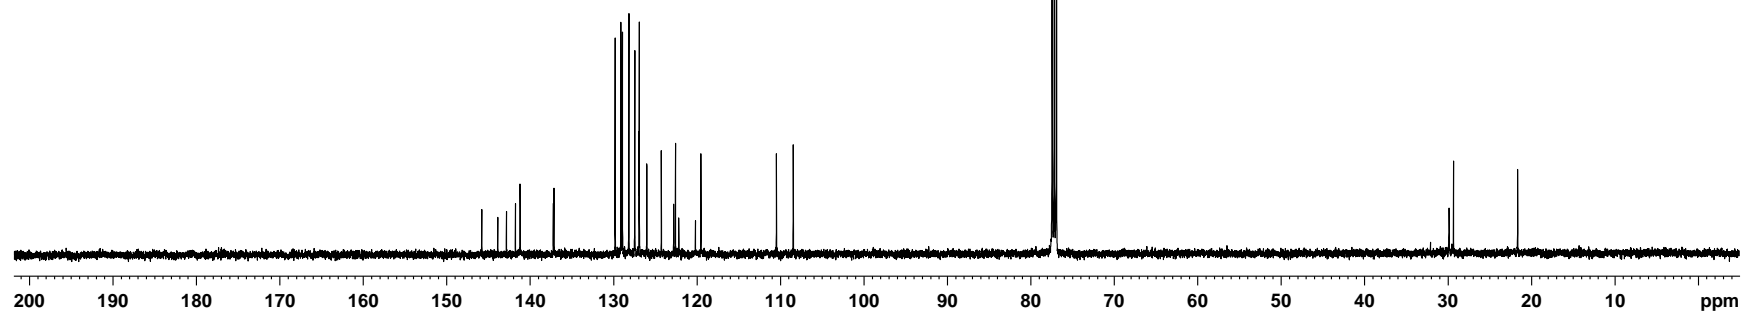

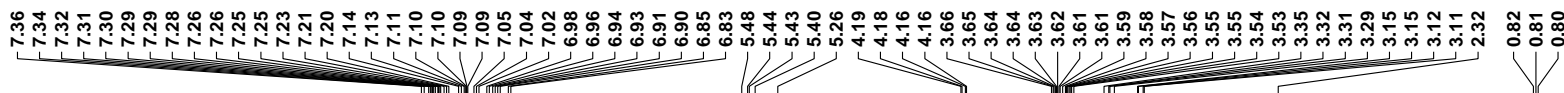

SJG-NEGI-4-348-3-1H

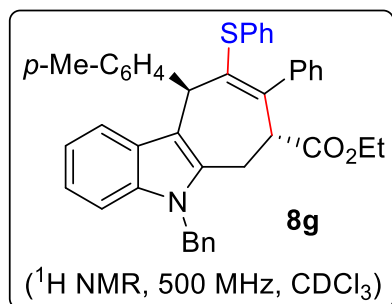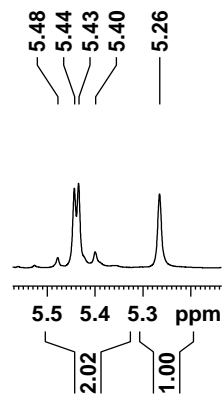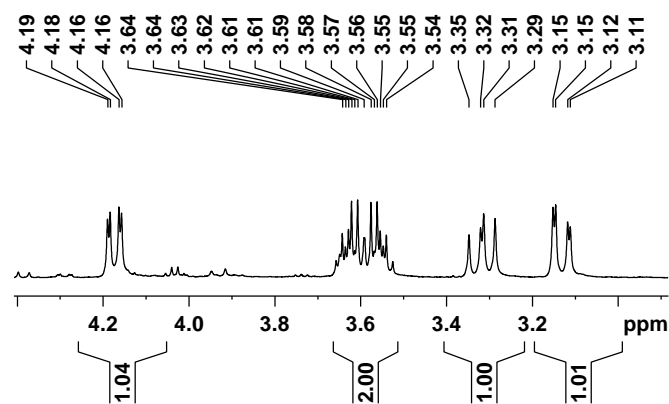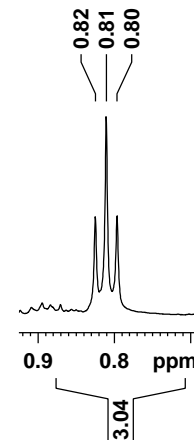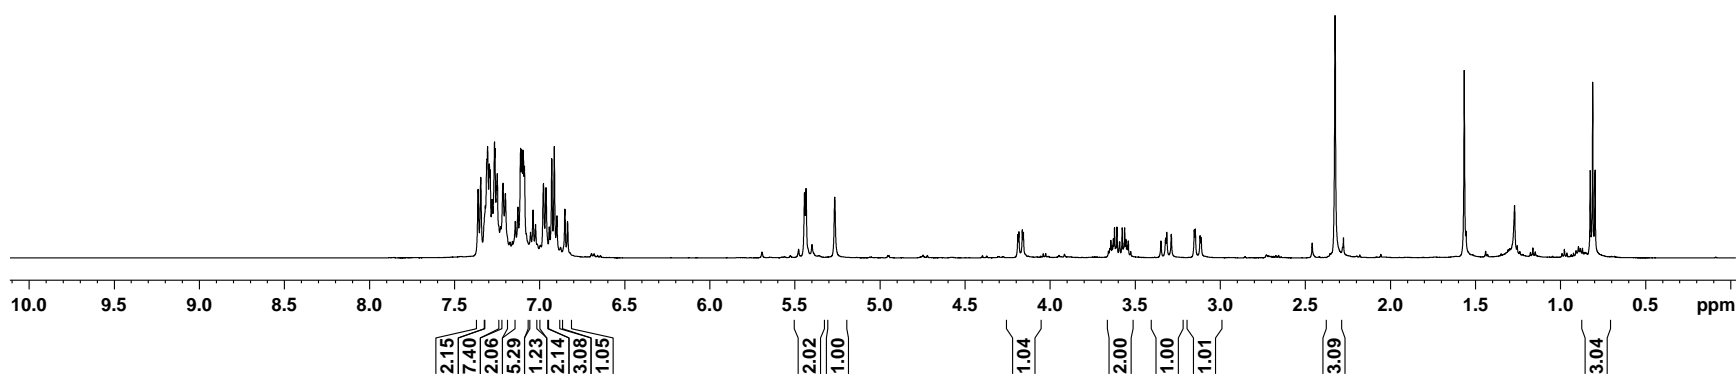

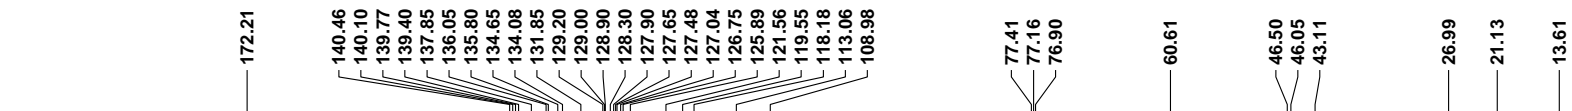

SJG-NEGI-4-348-3-13C

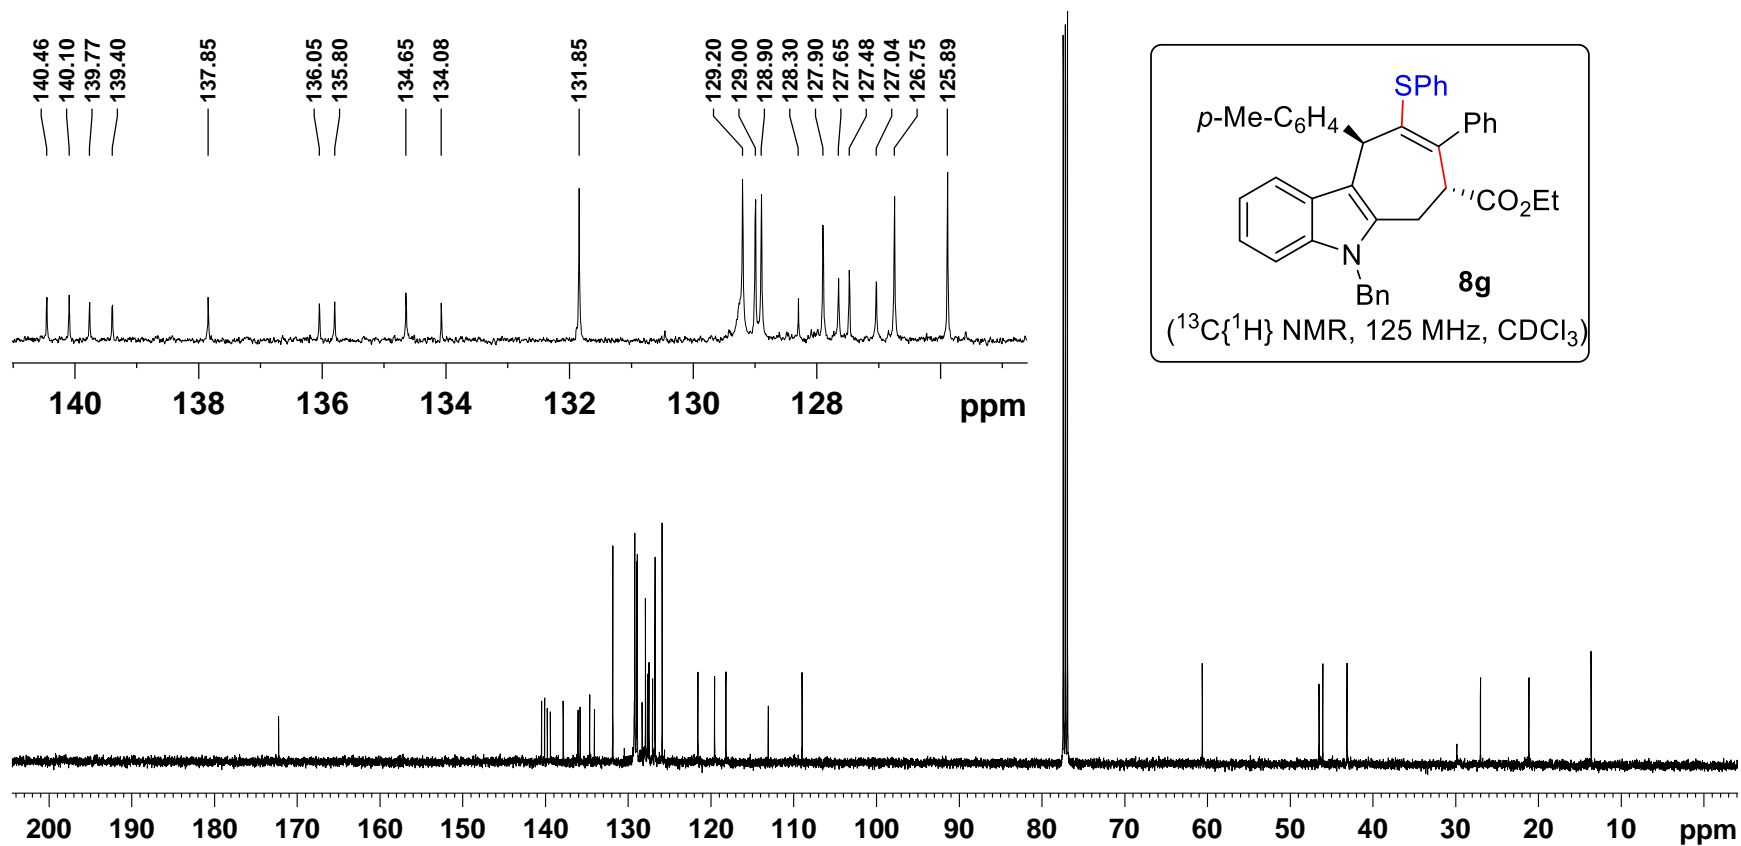



7.44  
7.36  
7.35  
7.34  
7.33  
7.33  
7.32  
7.31  
7.29  
7.28  
7.27  
7.26  
7.26  
7.25  
7.24  
7.22  
7.20  
7.12  
7.00  
7.00  
6.98  
6.97  
6.96  
6.95  
6.94  
6.94  
6.93  
6.93  
6.92  
6.91  
6.91  
6.78  
6.76  
6.72  
6.71  
6.70  
5.55

2.47

SJG-NEGI-4-348-1-1H

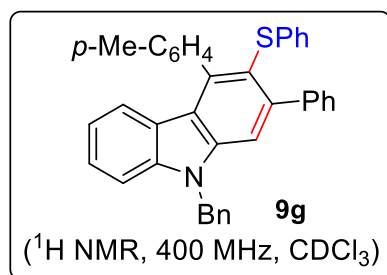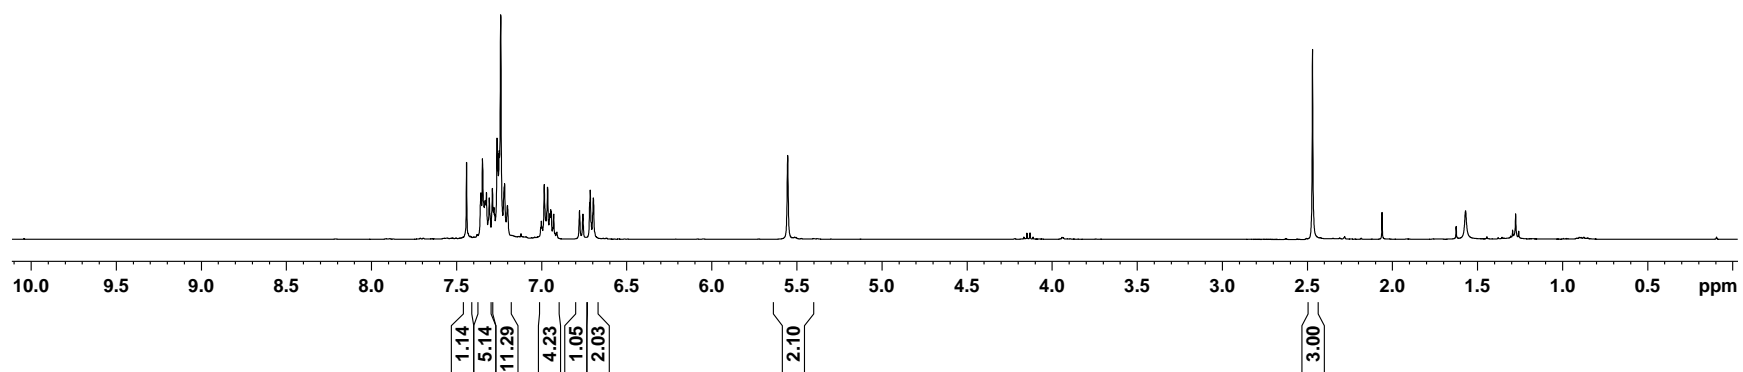

145.88  
143.95  
142.67  
141.44  
141.06  
140.97  
137.17  
136.83  
129.83  
129.12  
128.99  
128.95  
128.16  
127.74  
127.40  
126.99  
126.92  
126.57  
126.14  
124.30  
123.04  
122.66  
122.41  
120.68  
119.83  
110.62  
109.00

77.47  
77.16  
76.84

46.80

21.64

SJG-NEGI-4-348-1-13C

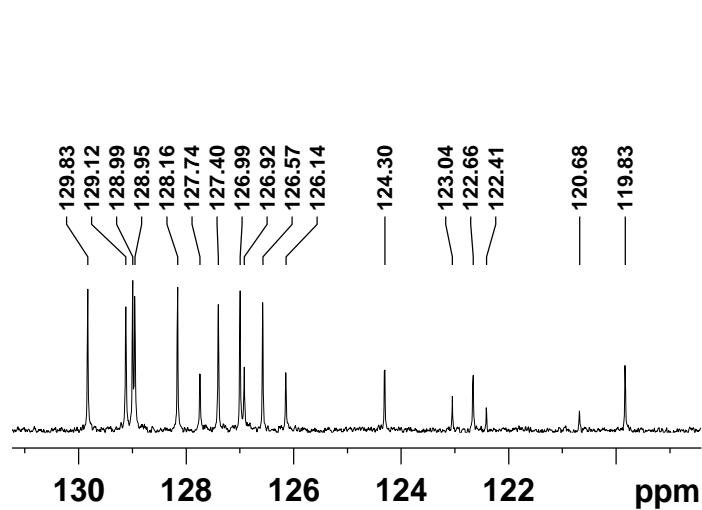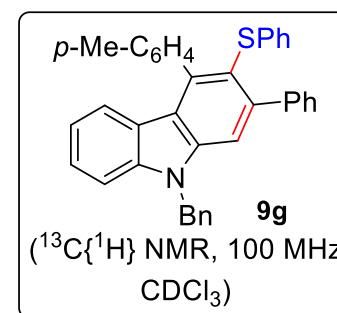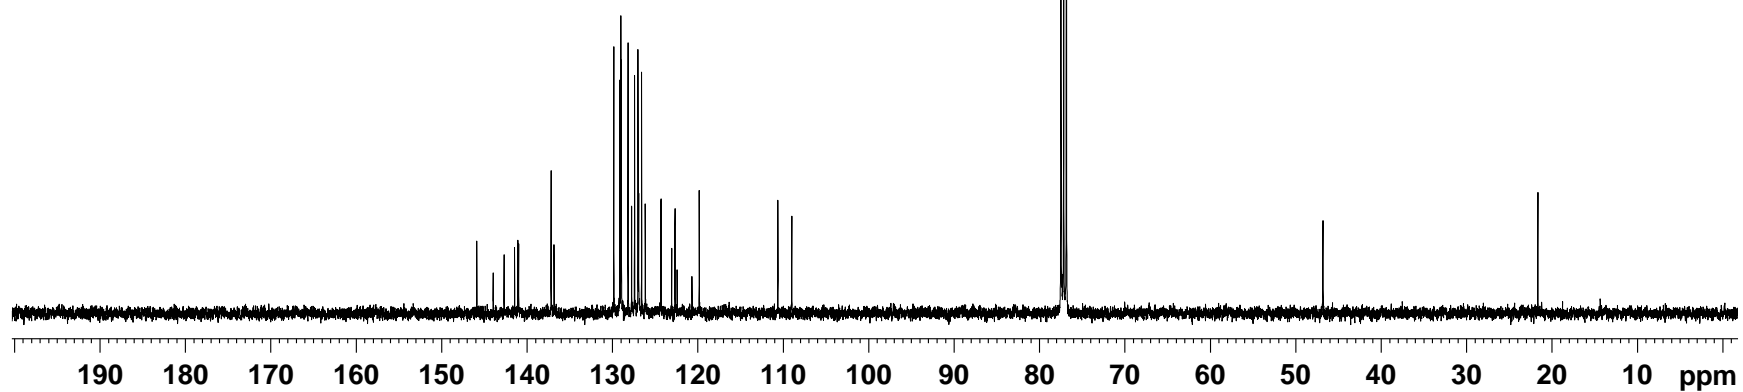



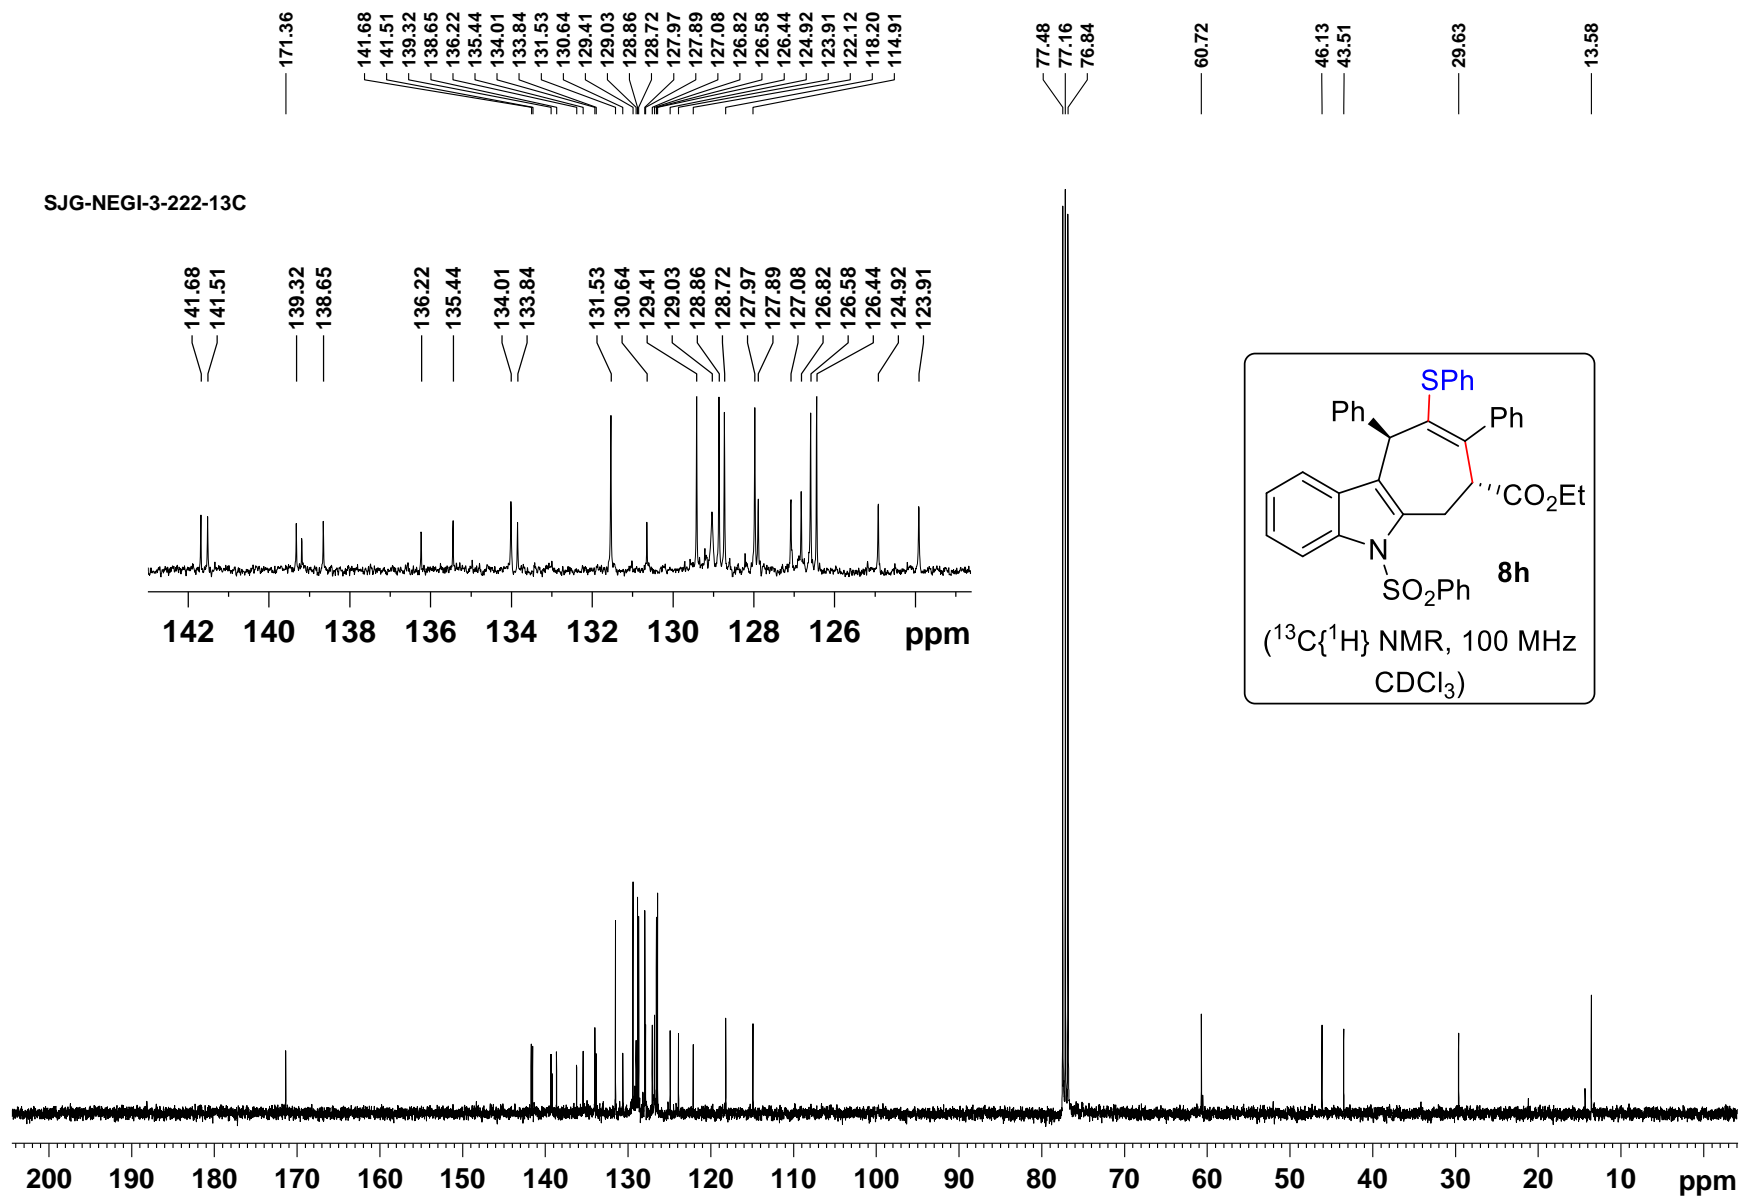

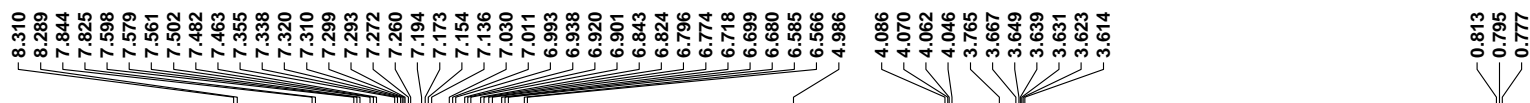

SJG-NEGI-3-239-1H

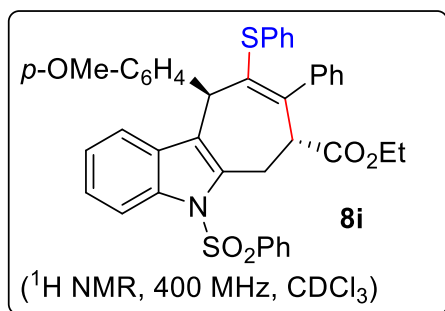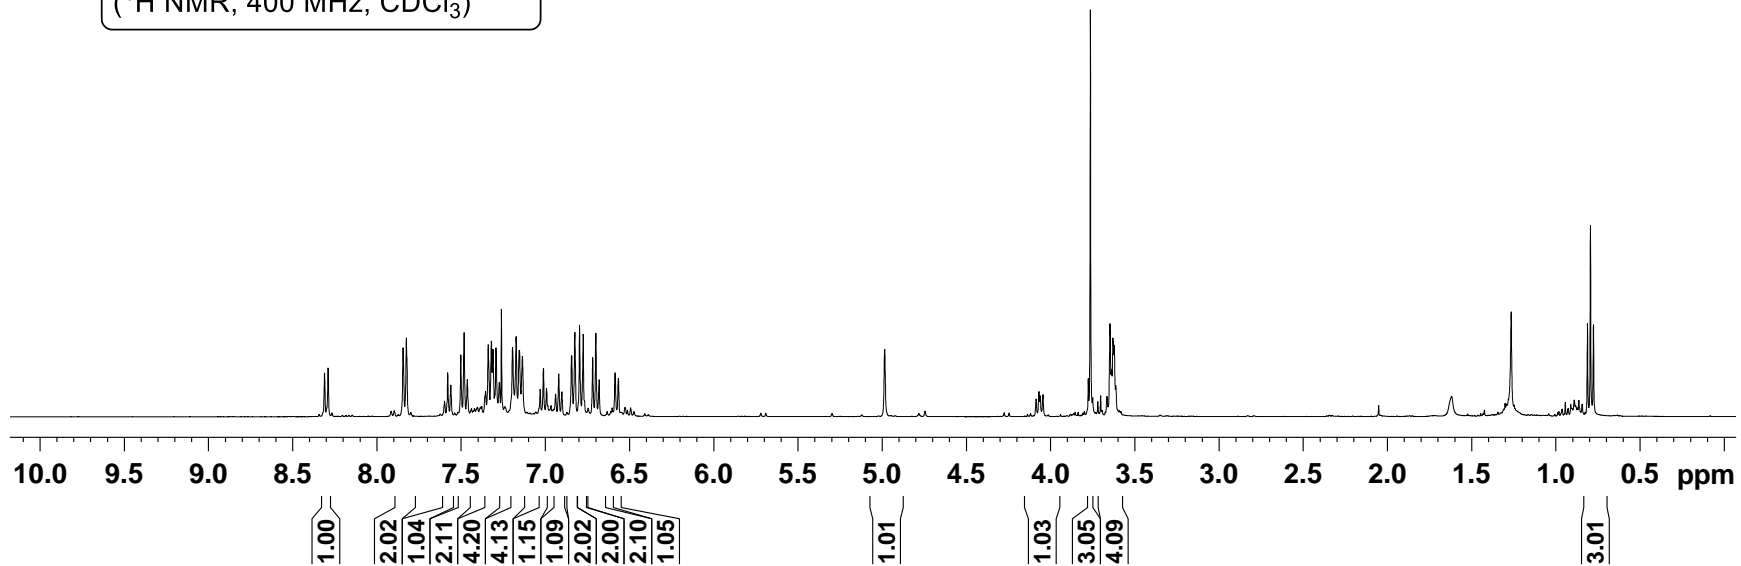

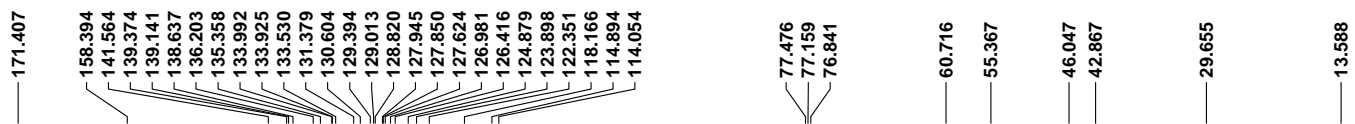

SJG-NEGI-3-239-13C

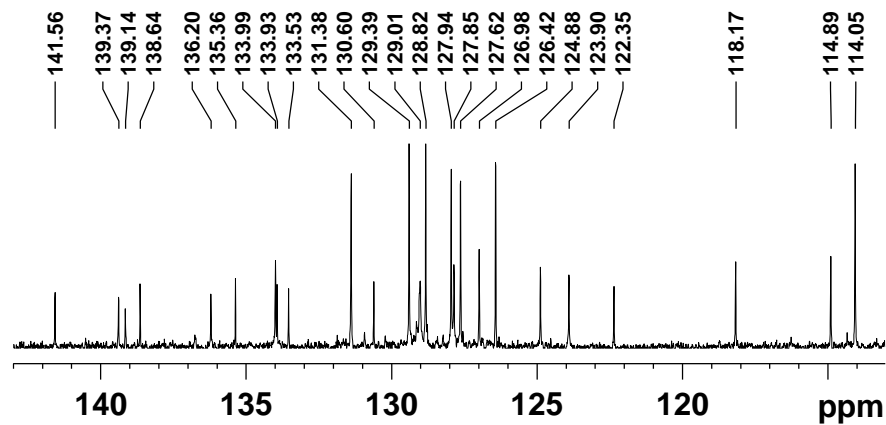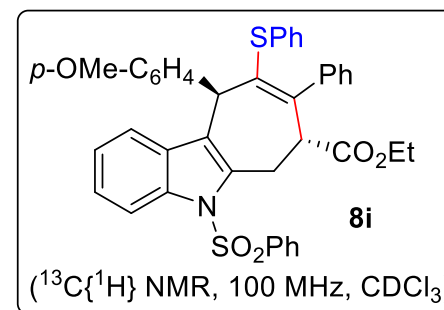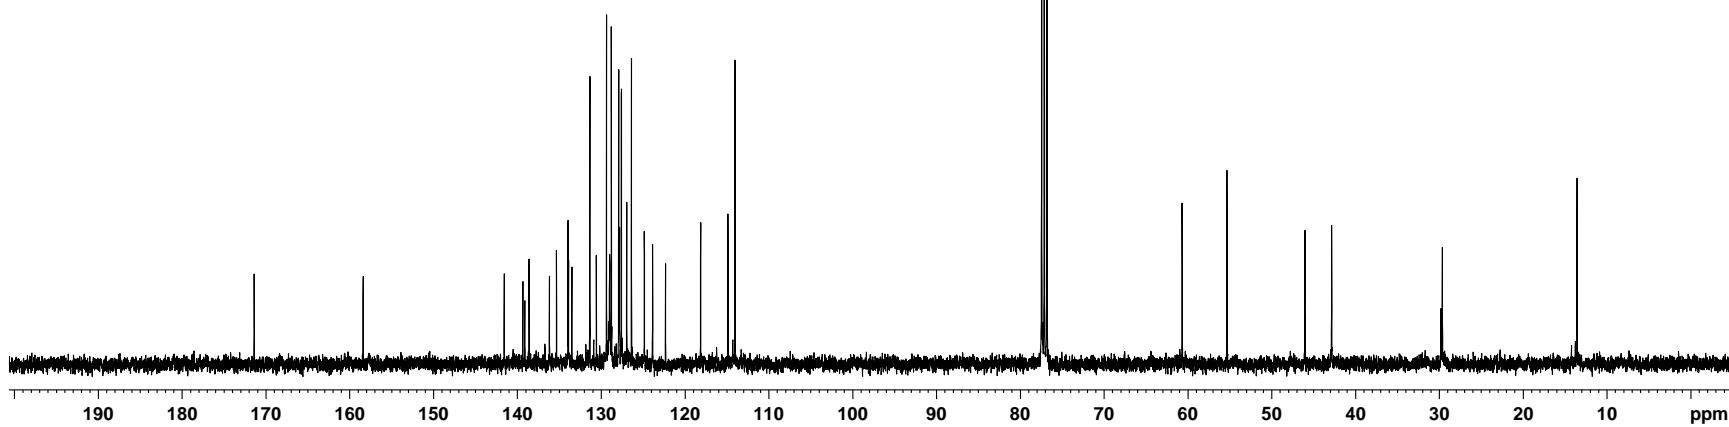



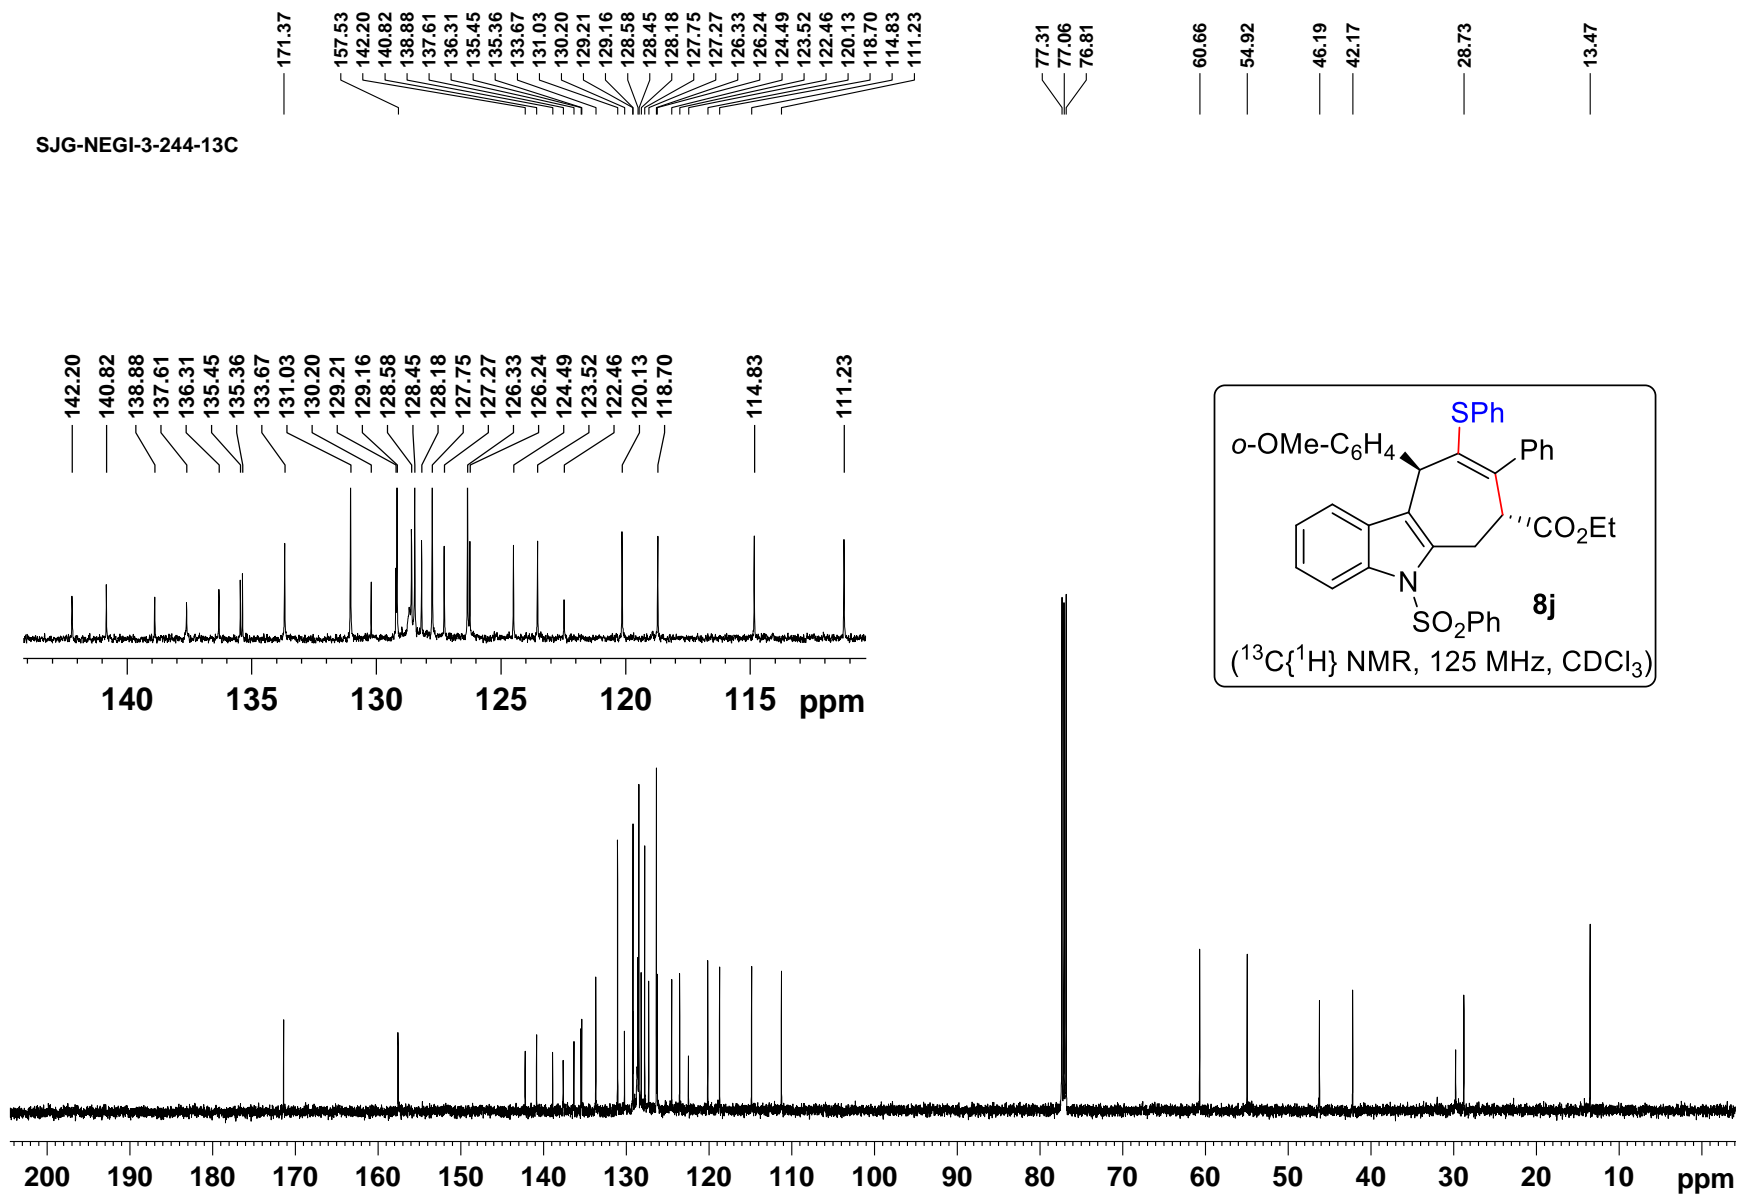



8.312  
8.295  
7.841  
7.825  
7.609  
7.593  
7.579  
7.506  
7.490  
7.475  
7.356  
7.342  
7.327  
7.319  
7.304  
7.289  
7.267  
7.206  
7.137  
7.123  
7.033  
7.017  
7.002  
6.955  
6.940  
6.925  
6.850  
6.835  
6.735  
6.720  
6.705  
6.537  
6.522  
4.968  
3.939  
3.928  
3.918  
3.907  
3.667  
3.654  
3.640  
3.628  
3.618  
3.591  
3.654  
3.640  
3.628  
3.618  
3.591  
0.814  
0.800  
0.786

SJG-NEGI-09-1061-F-1H

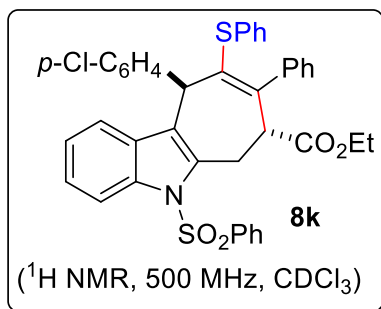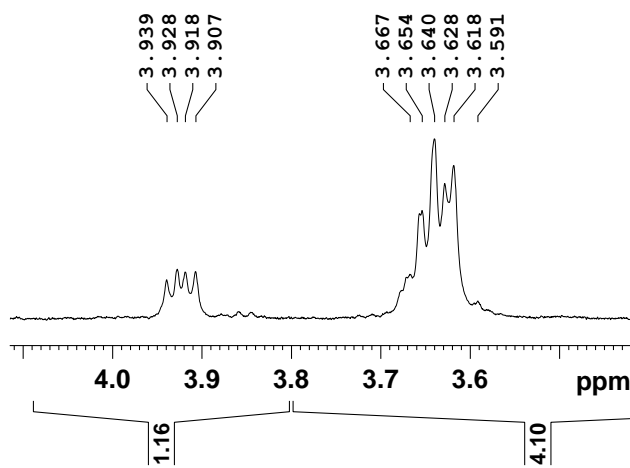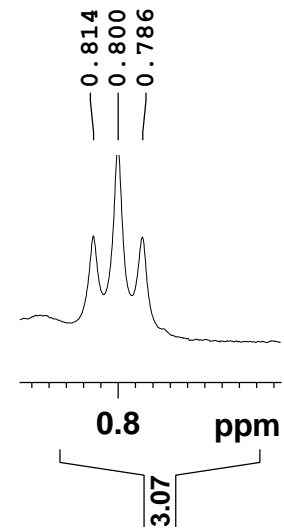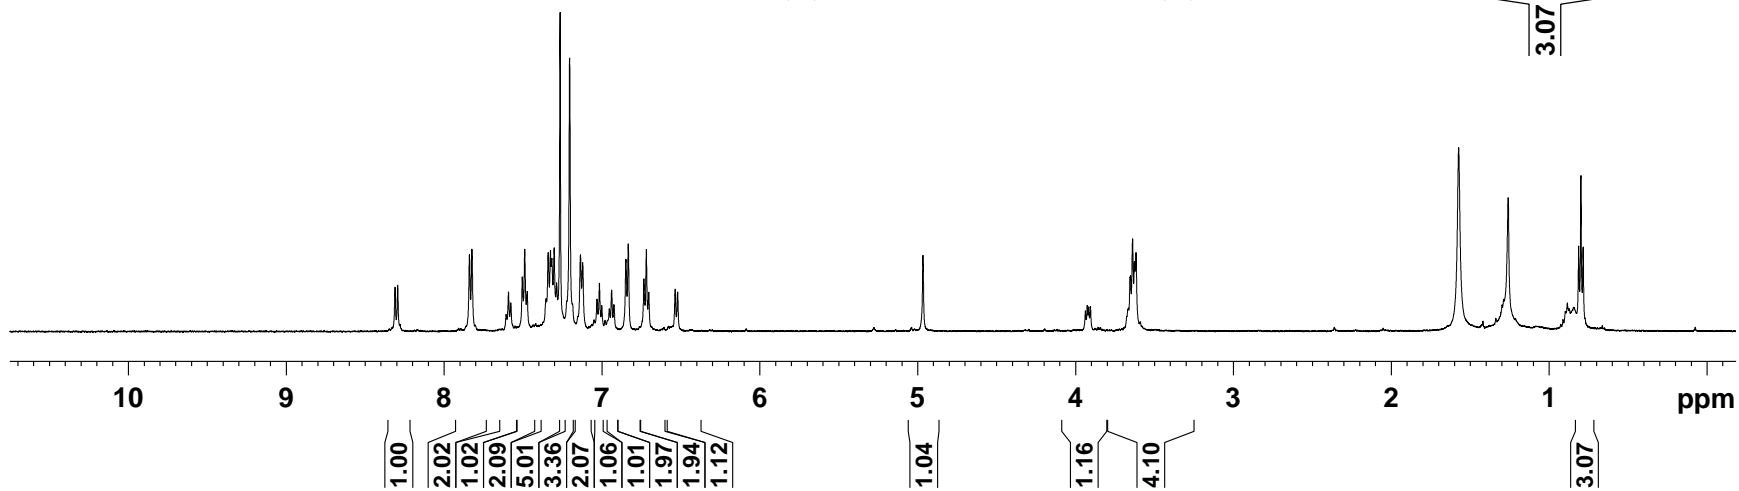

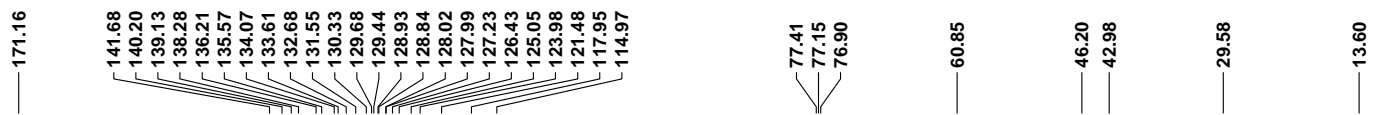

SJG-NEGI-9-1061-13C

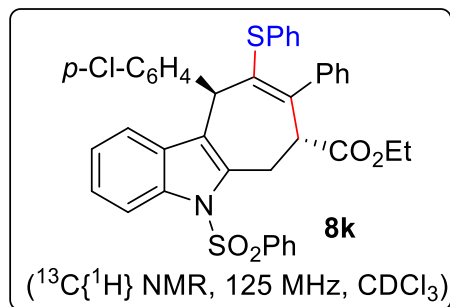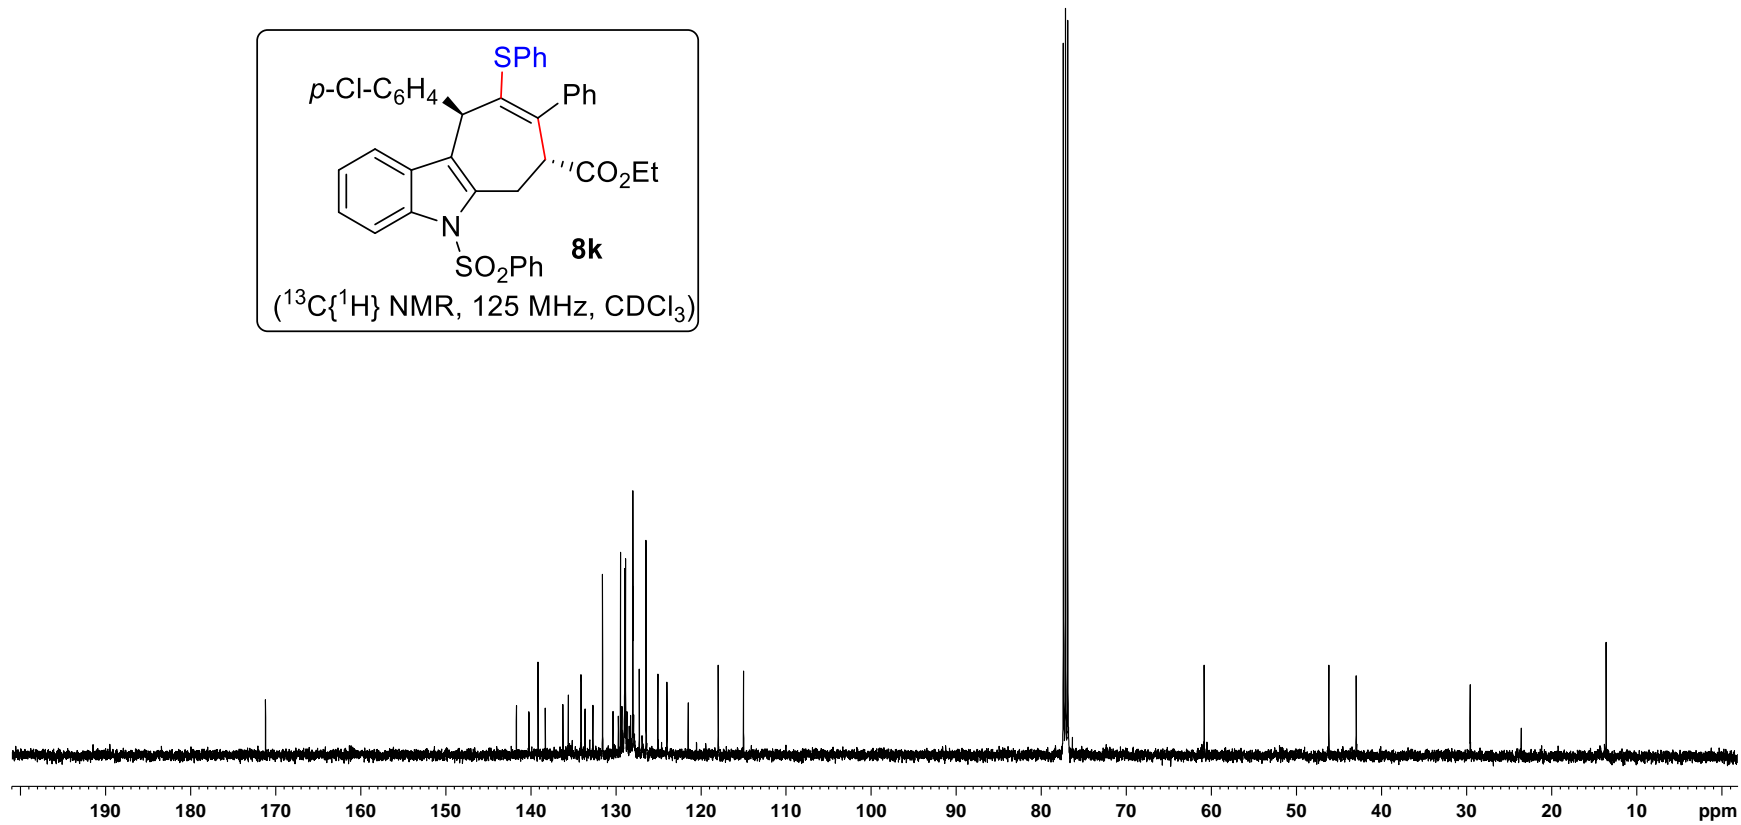

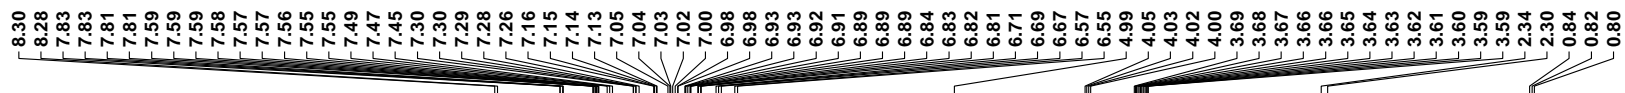

SJG-NEGI-3-277-B-1H

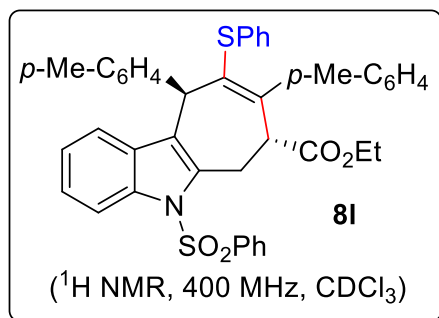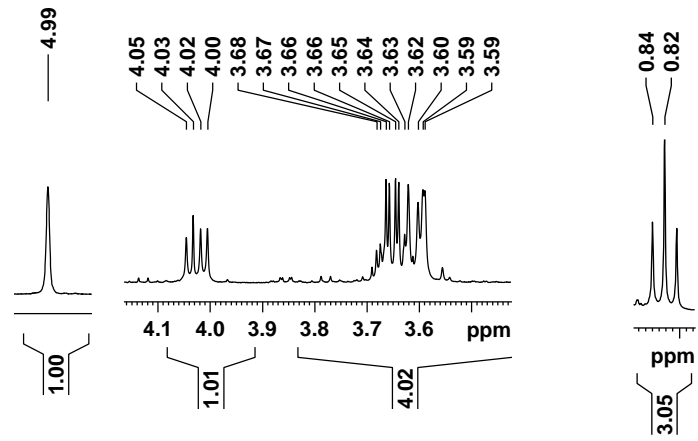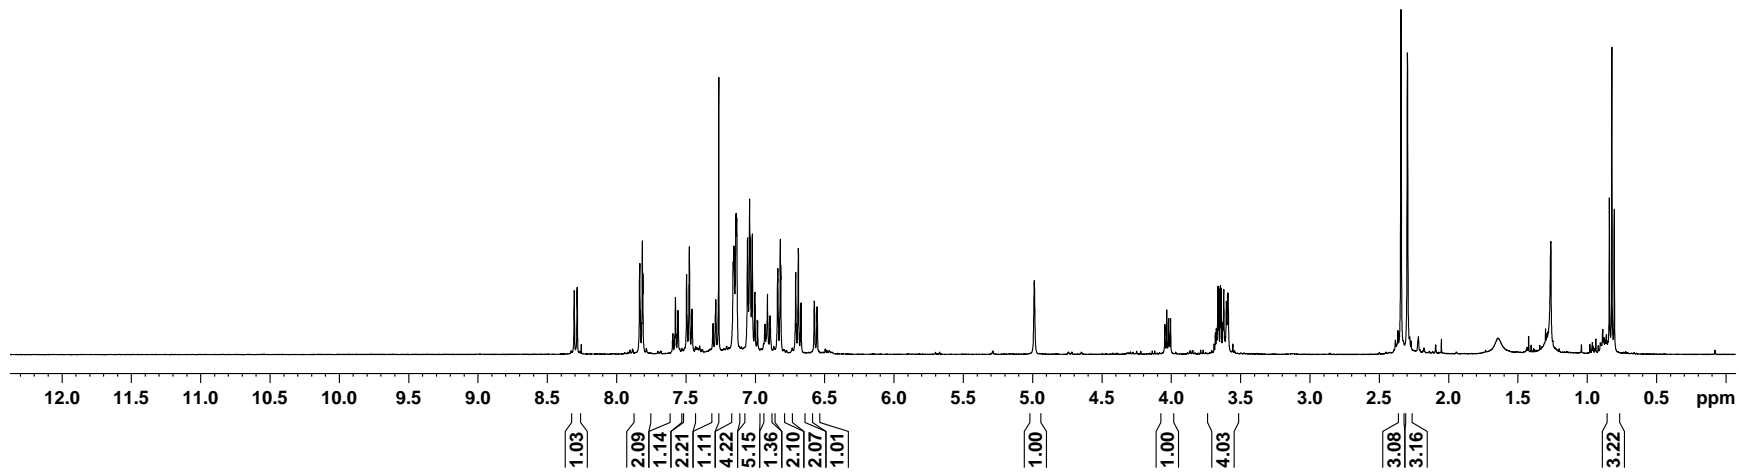

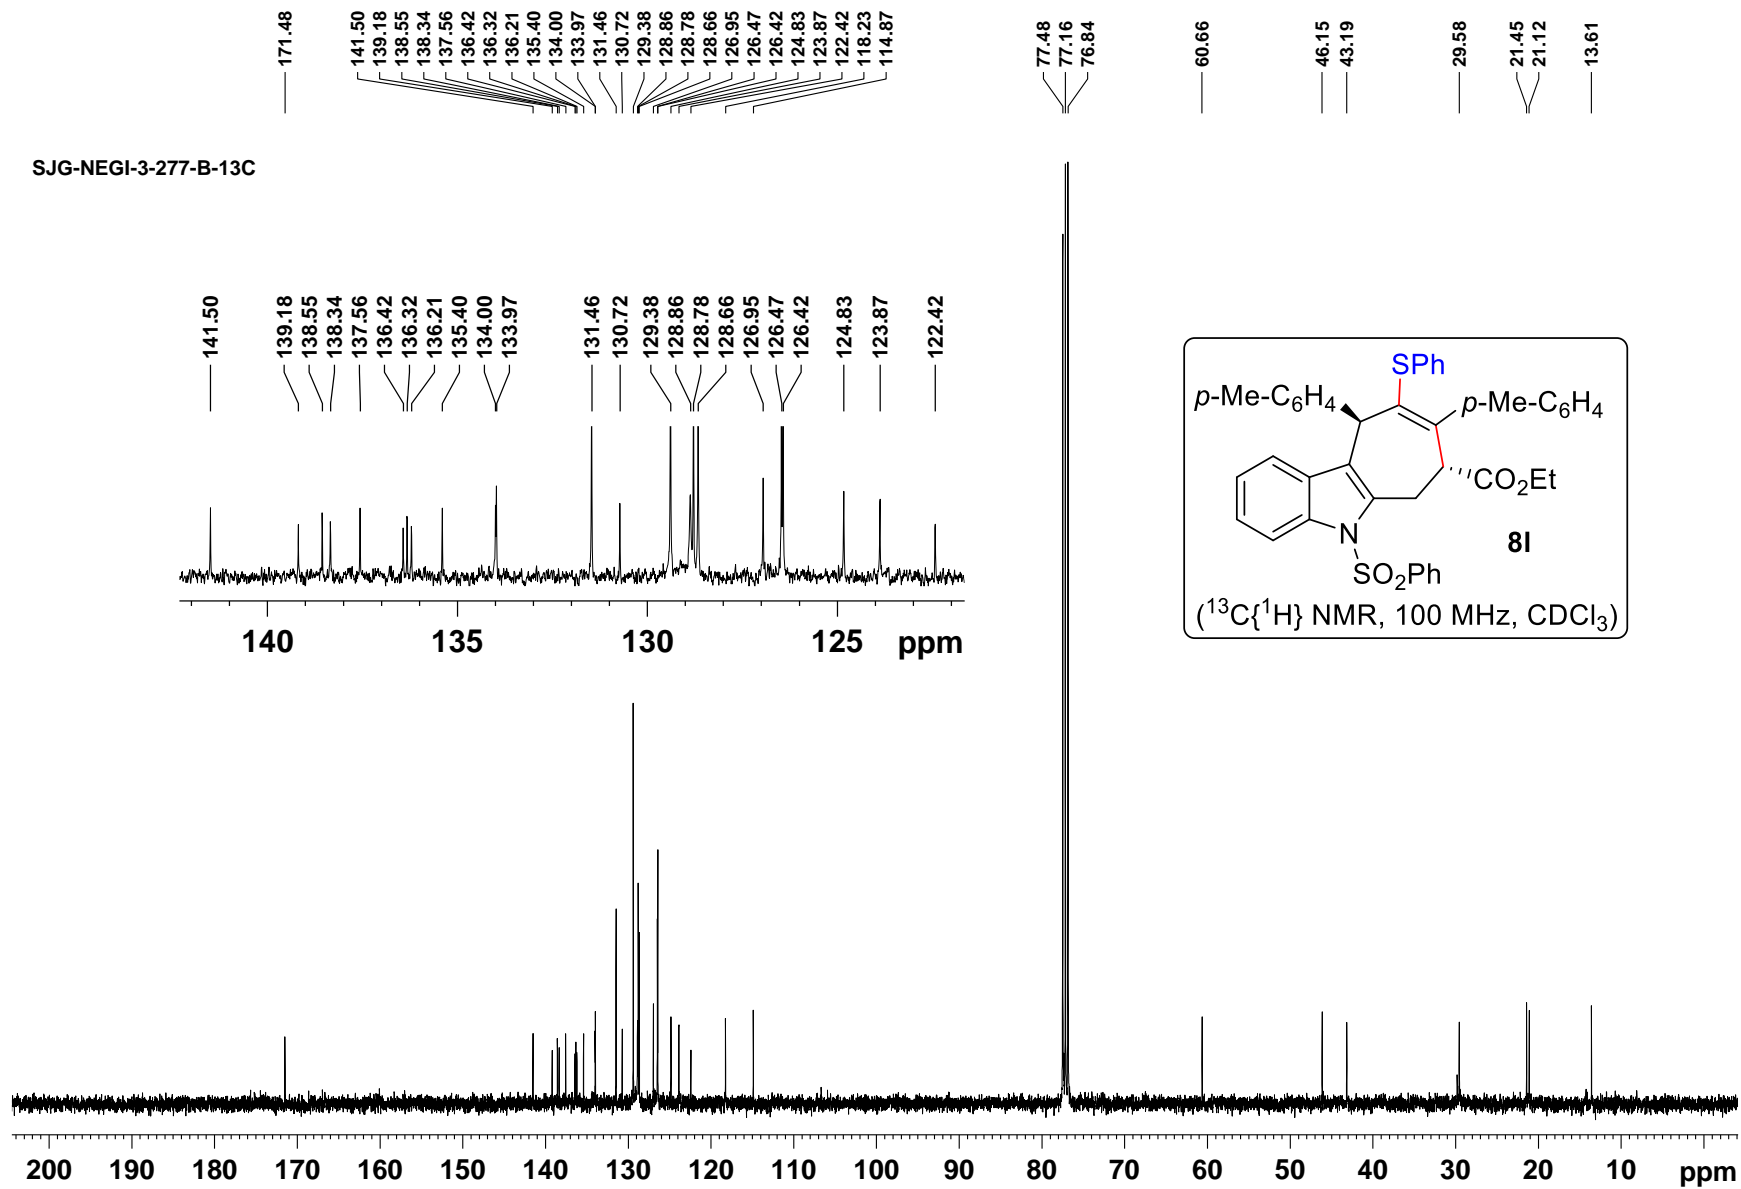

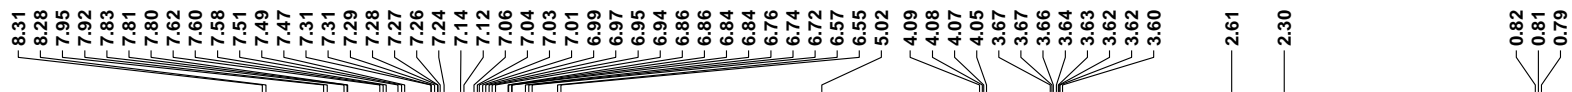

SJG-NEGI-4-311-p-1H

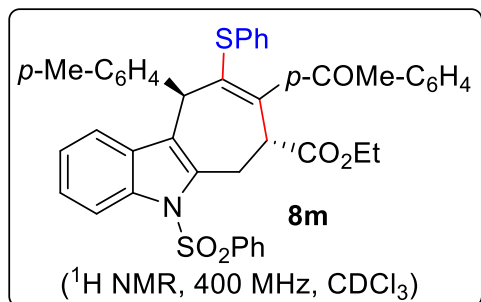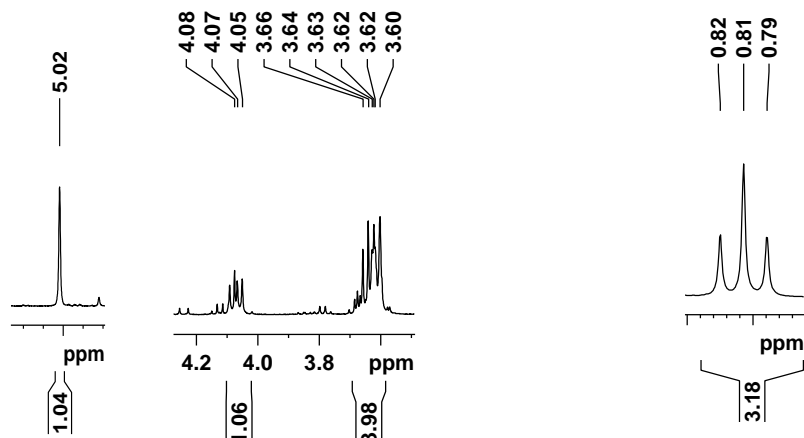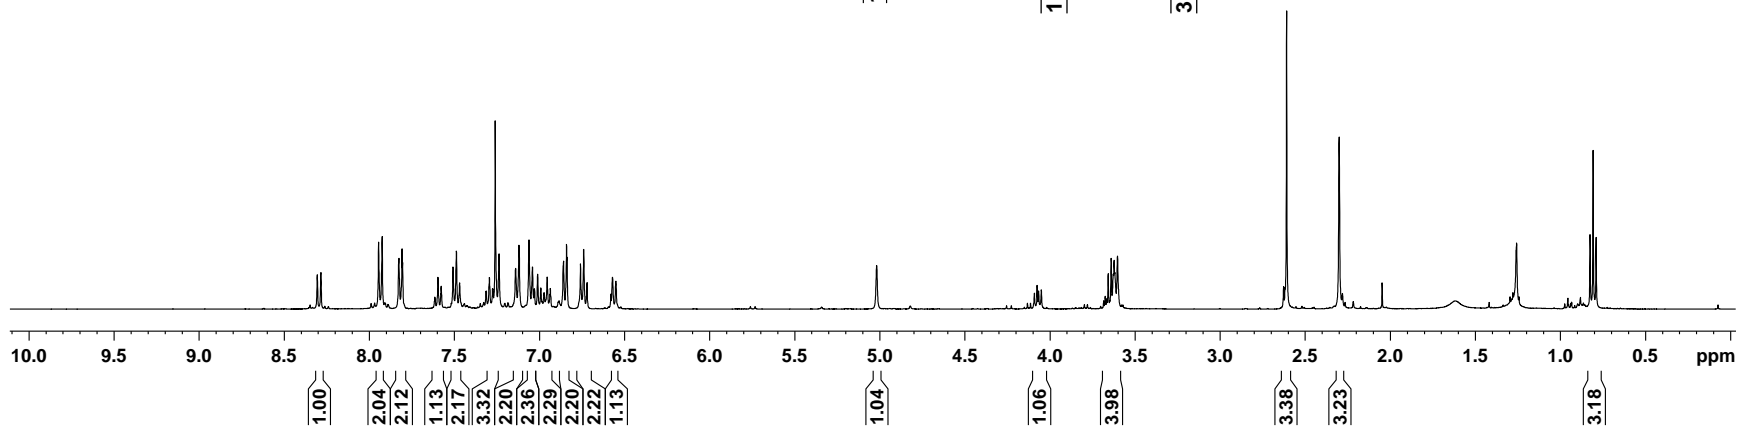

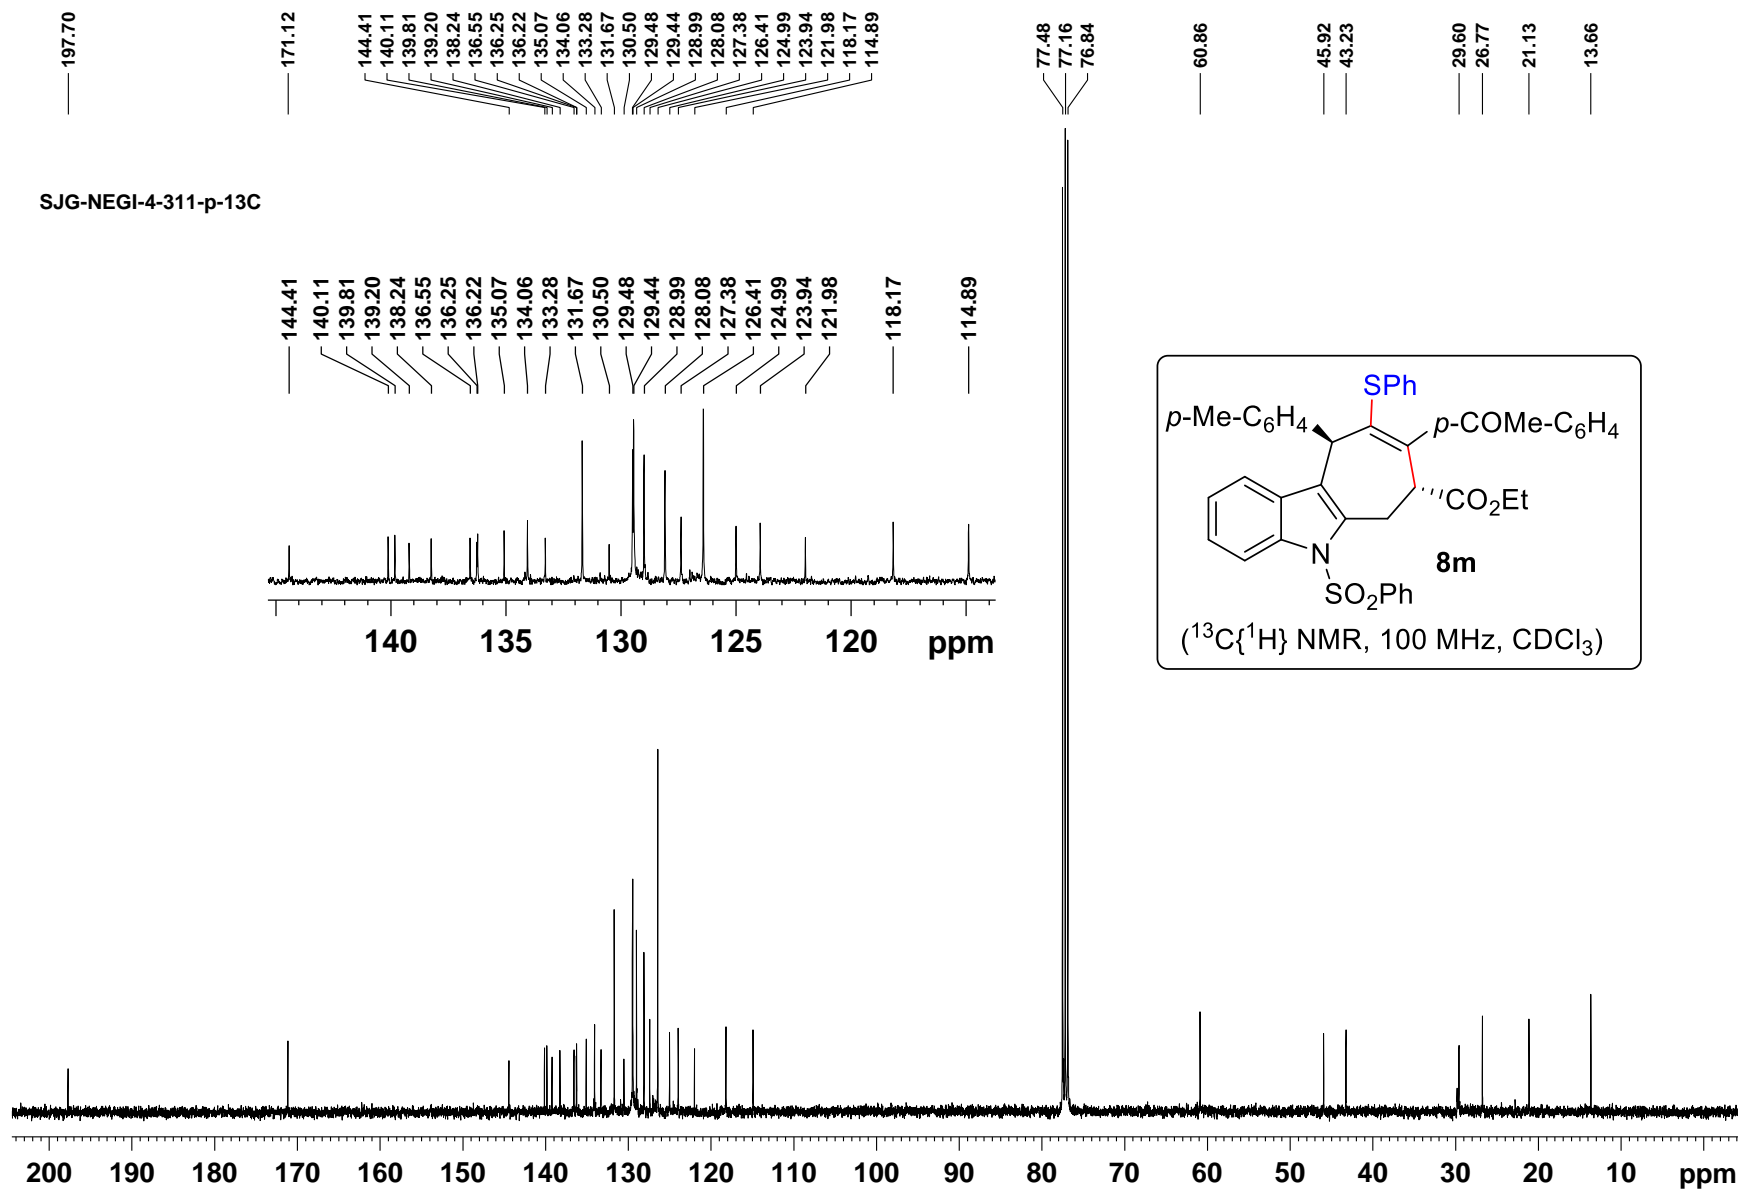

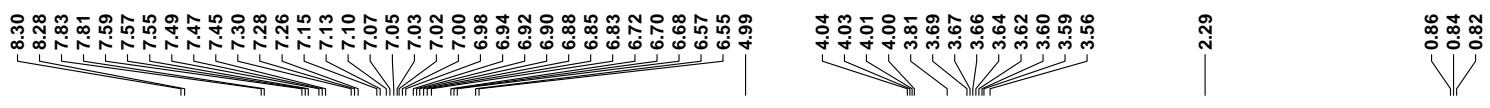

SJG-NEGI-9-1051-1H

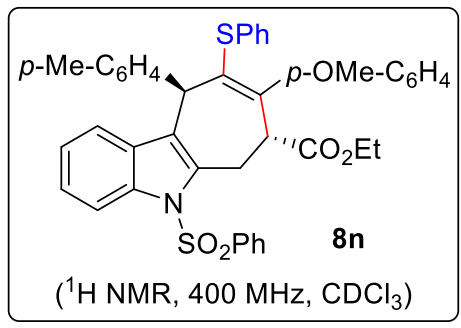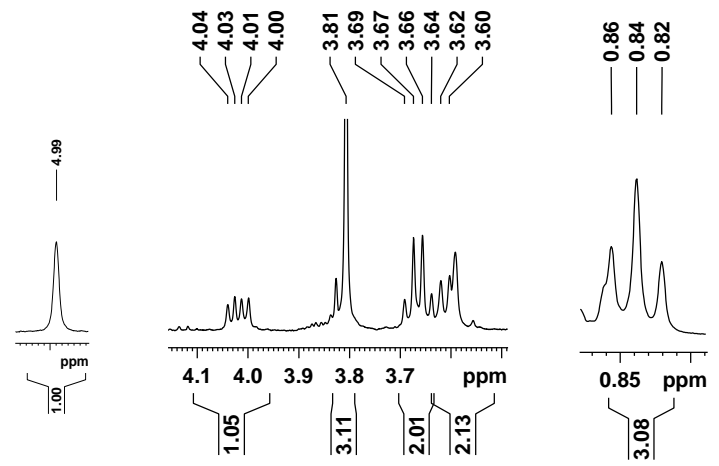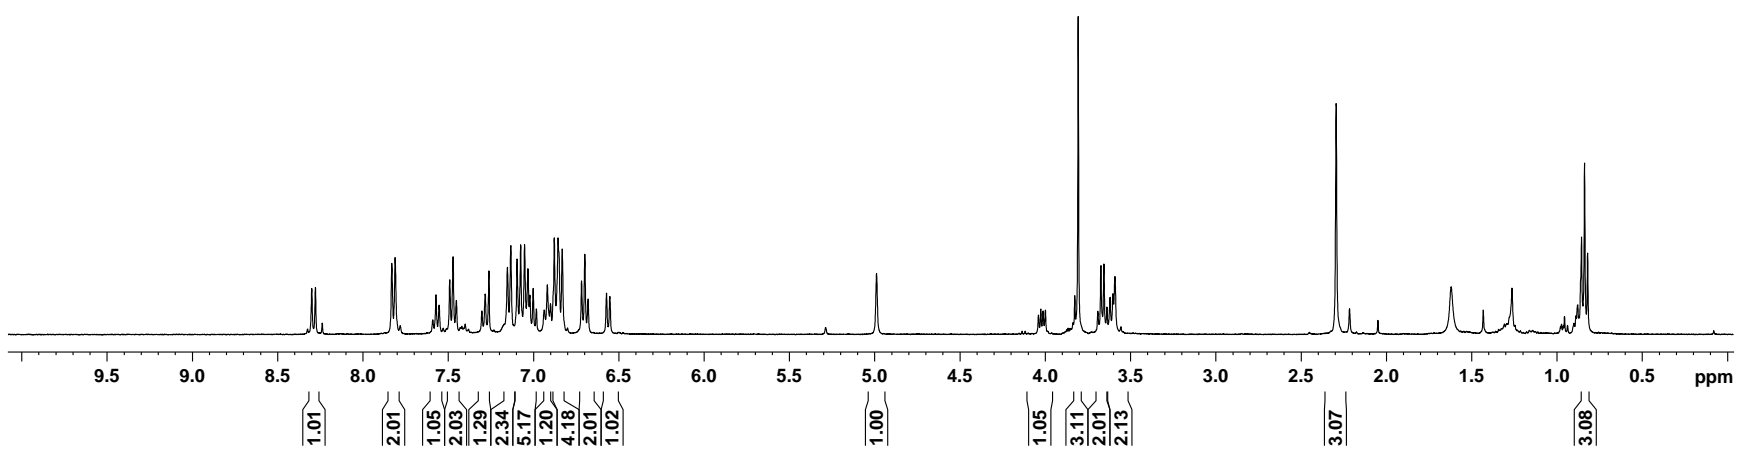

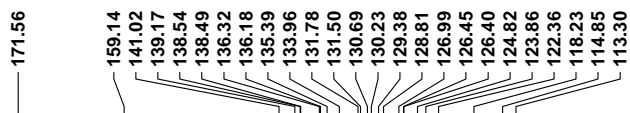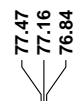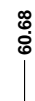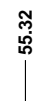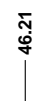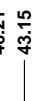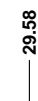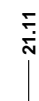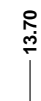

SJG-NEGI-9-1051-13C

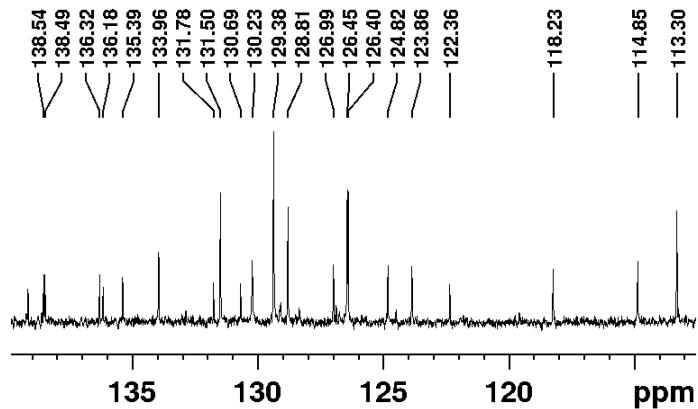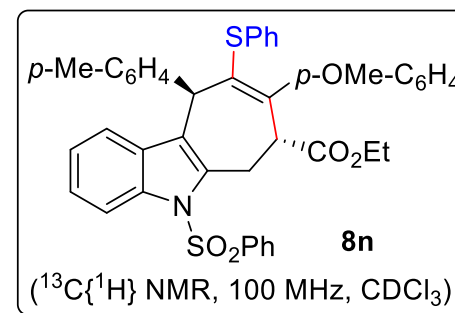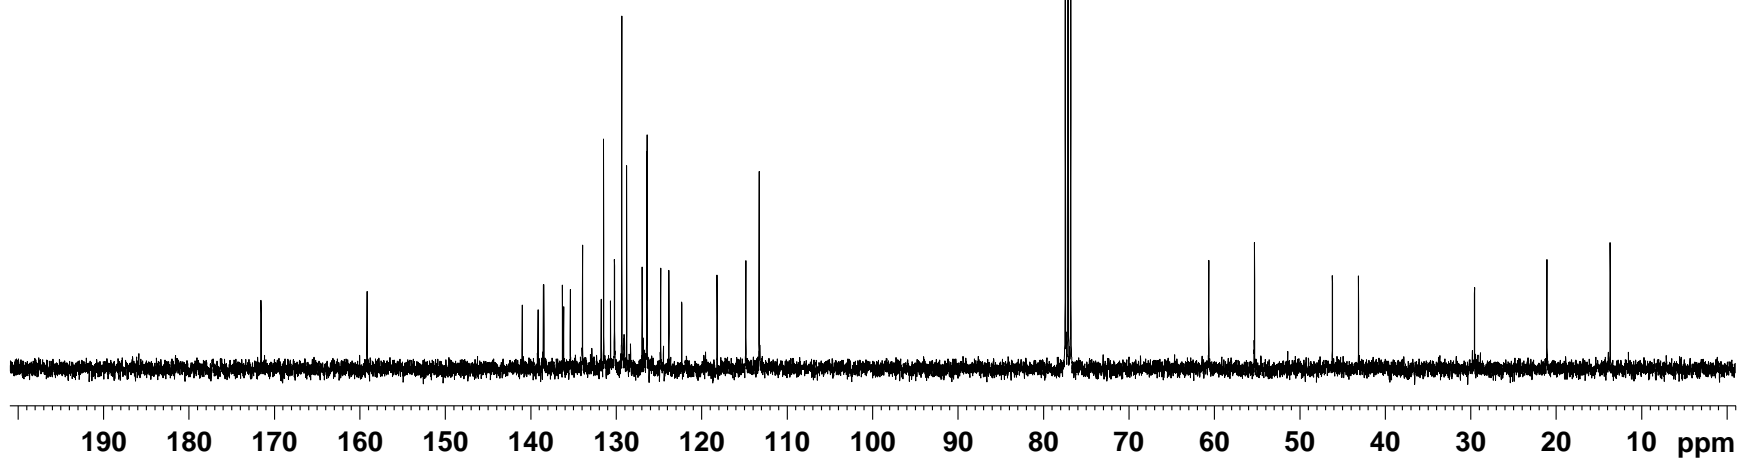



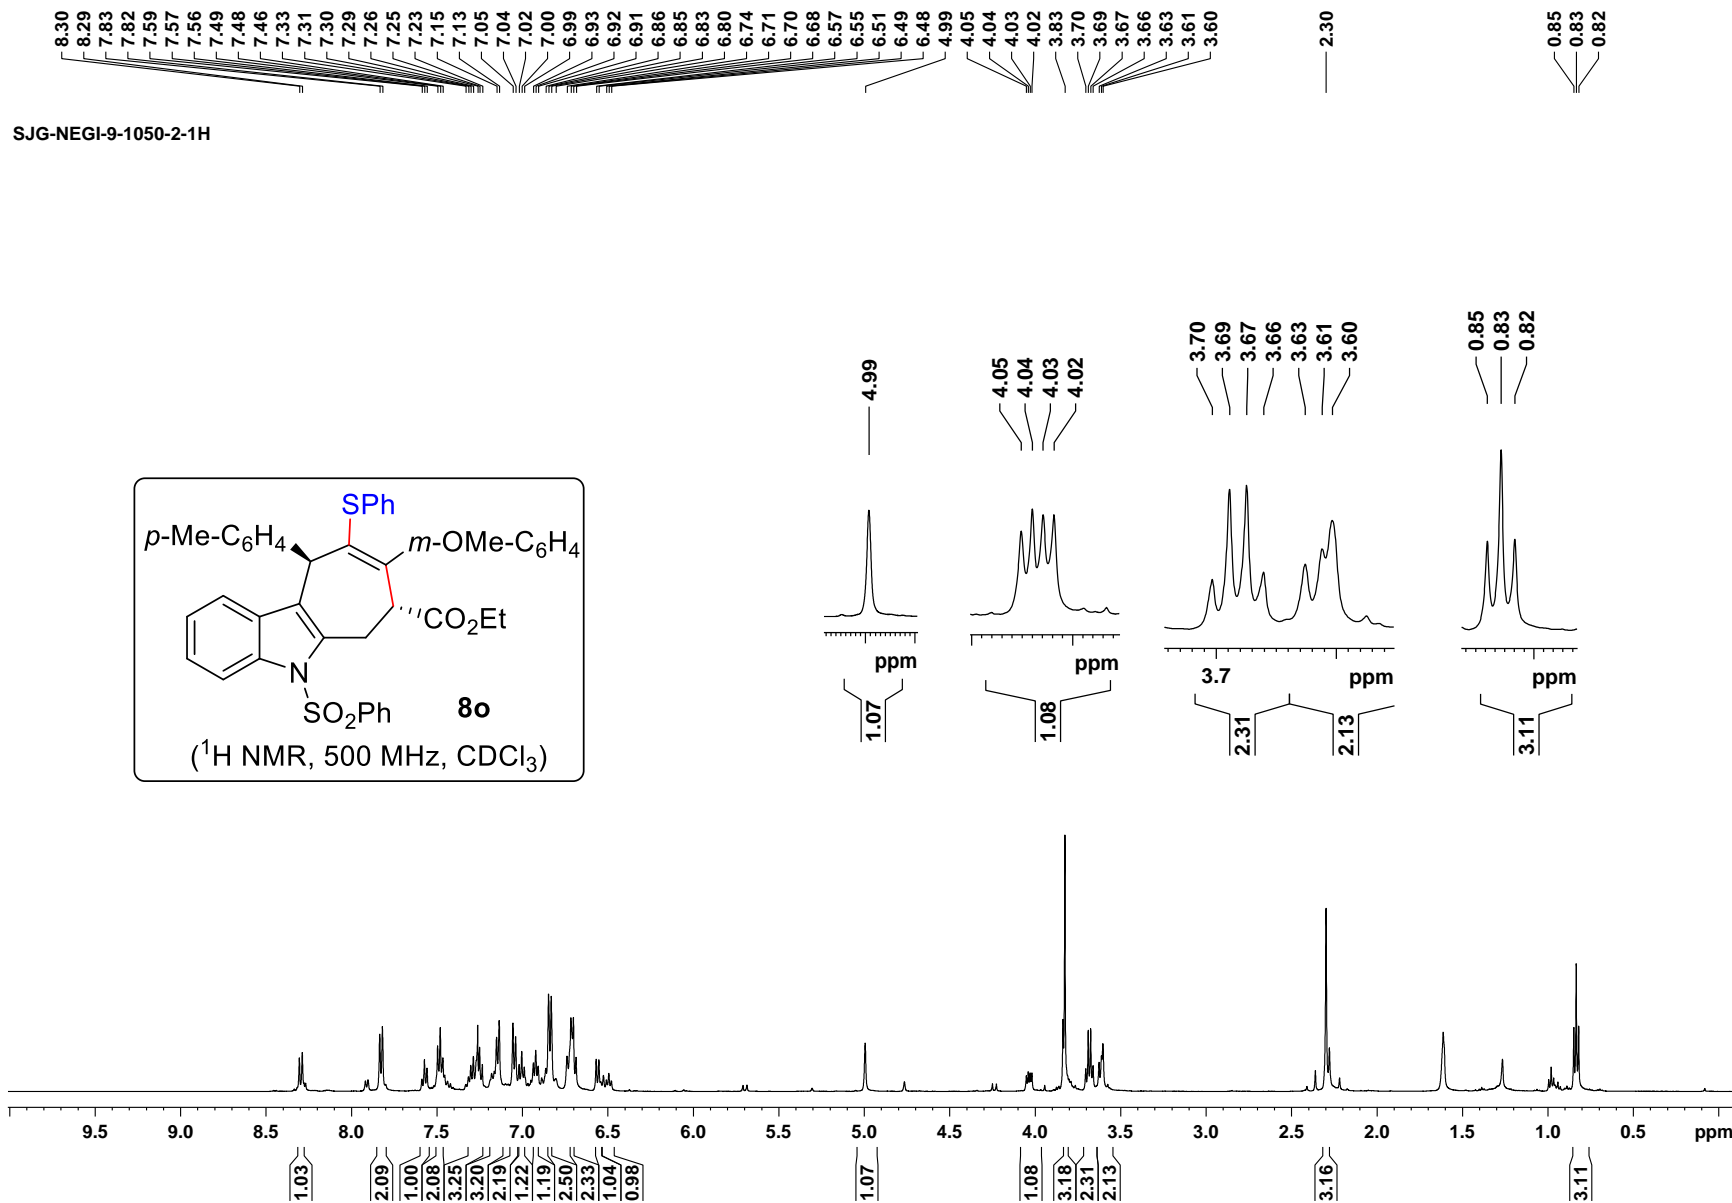

SJG-NEGI-9-1050-2-13C

171.34  
159.18  
141.17  
140.60  
139.13  
138.64  
138.49  
136.61  
136.36  
136.21  
135.36  
134.00  
133.95  
131.51  
130.70  
129.40  
129.00  
128.83  
127.01  
126.46  
126.40  
124.85  
123.89  
122.31  
118.21  
114.90  
112.81

77.41  
77.16  
76.90

60.72

55.41

46.10

43.19

29.64

21.11

13.62

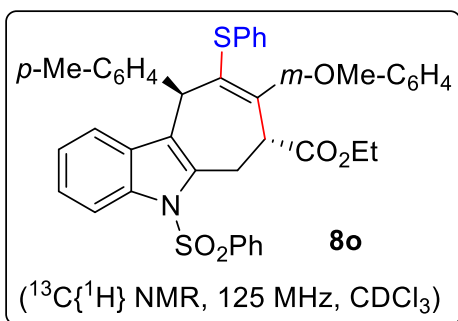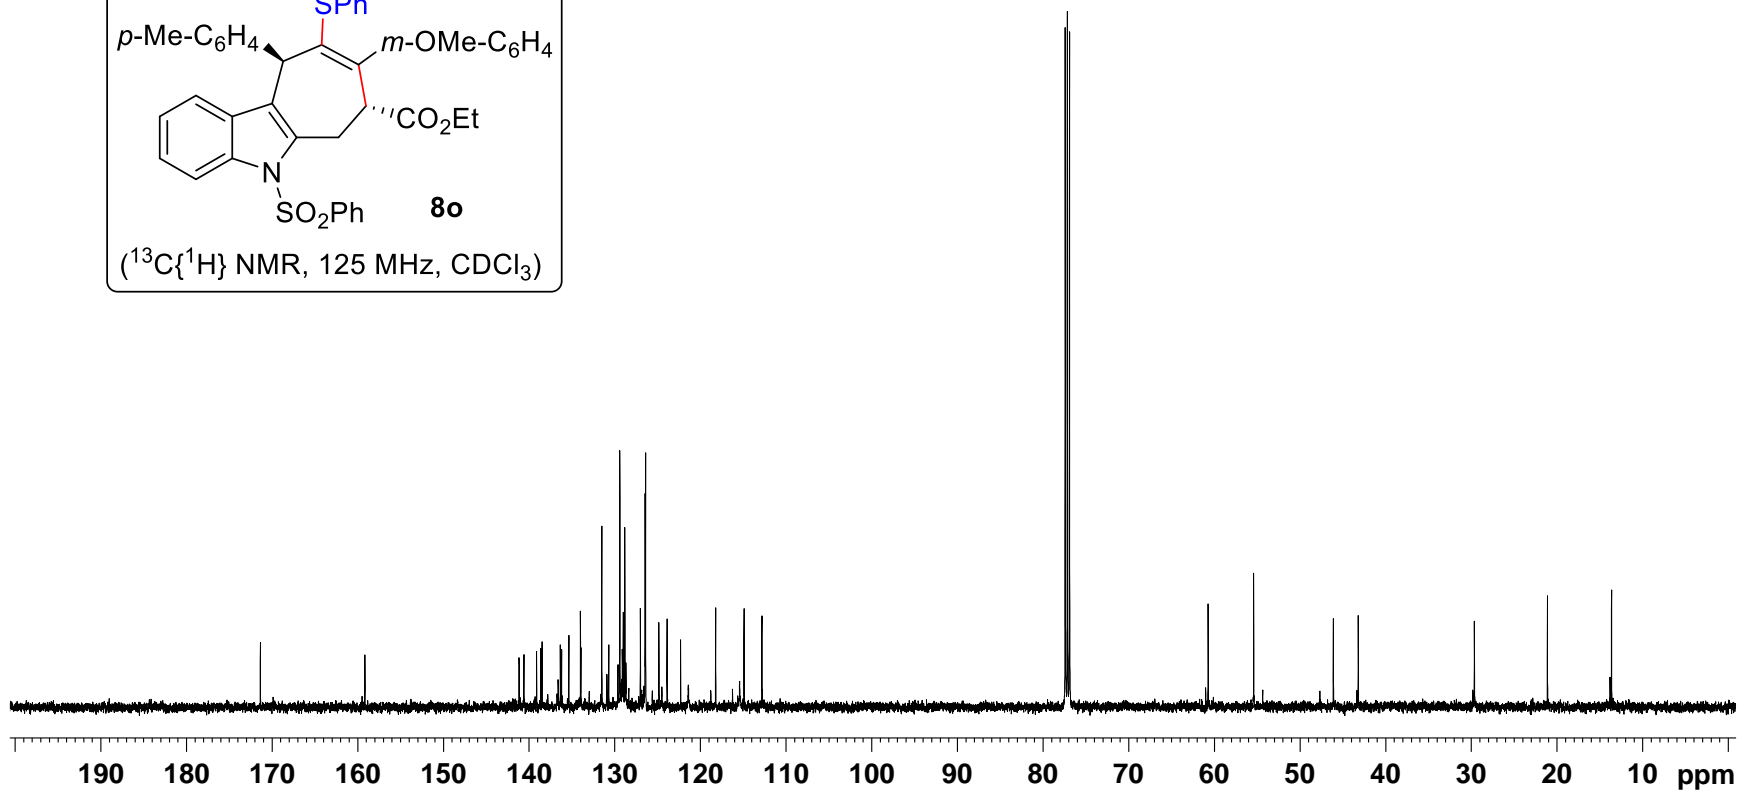

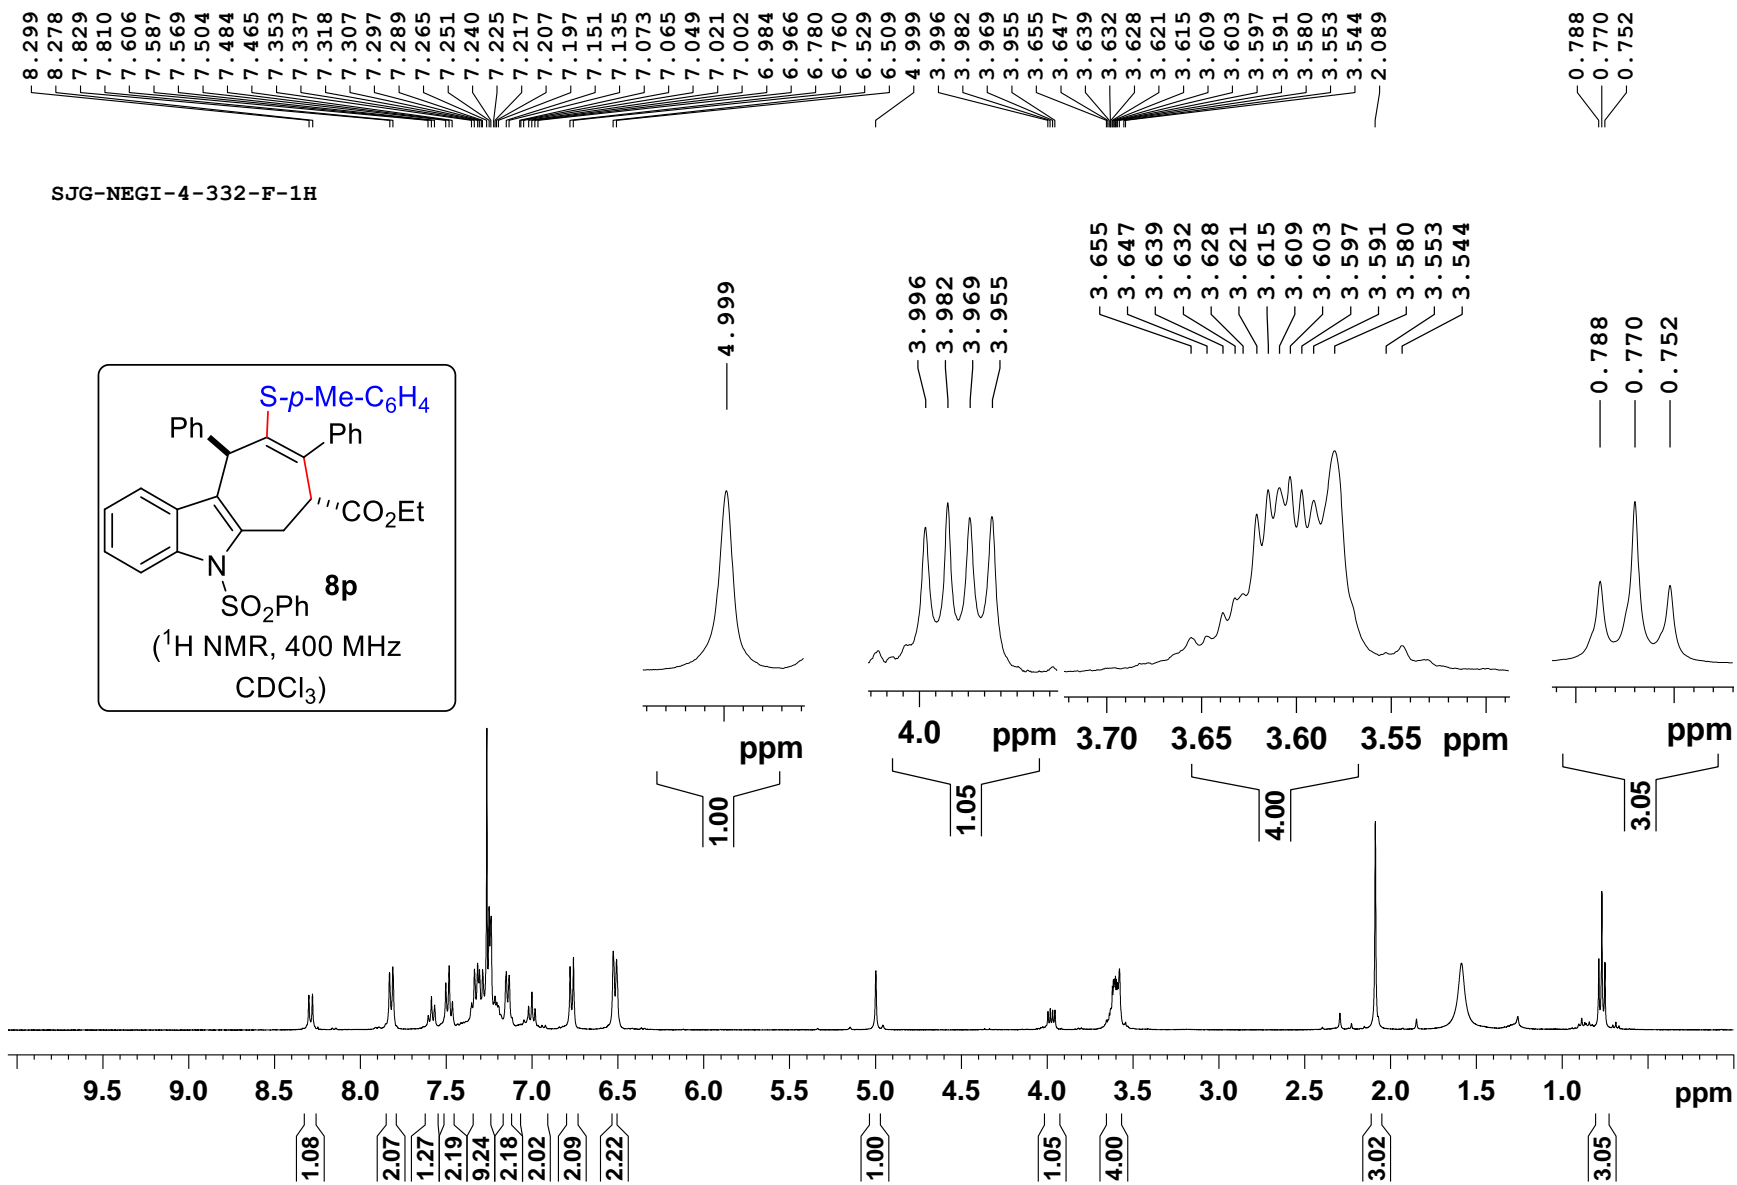

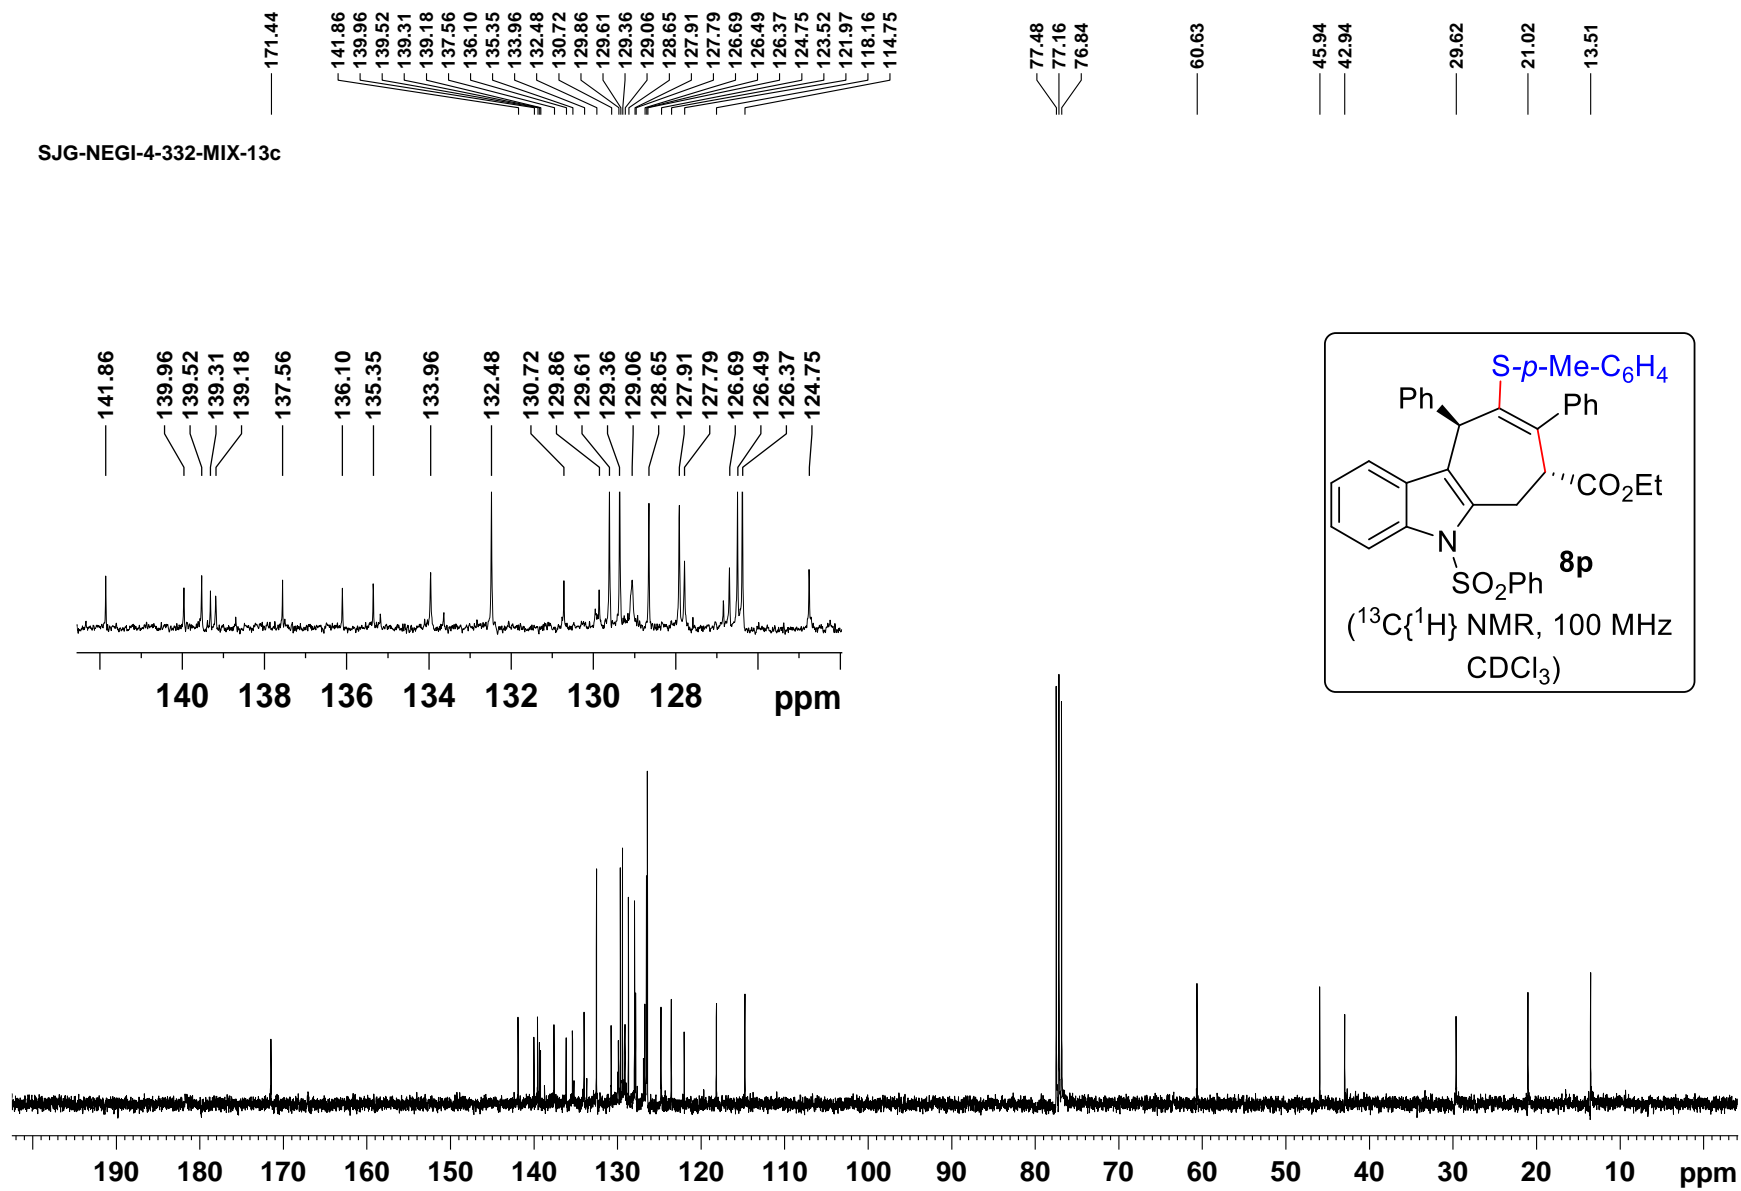

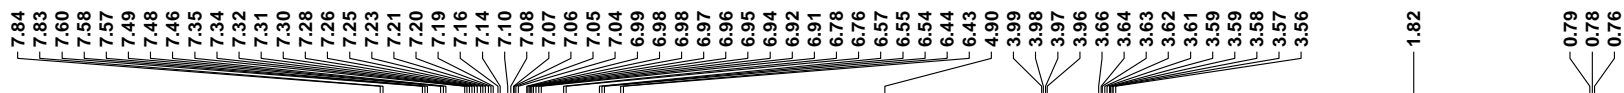

SJG-NEGI-4-326-1H

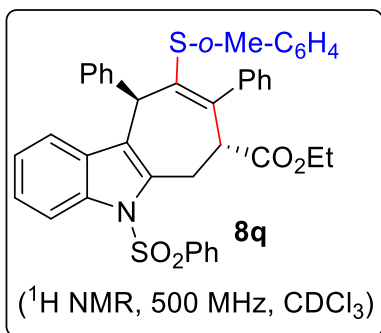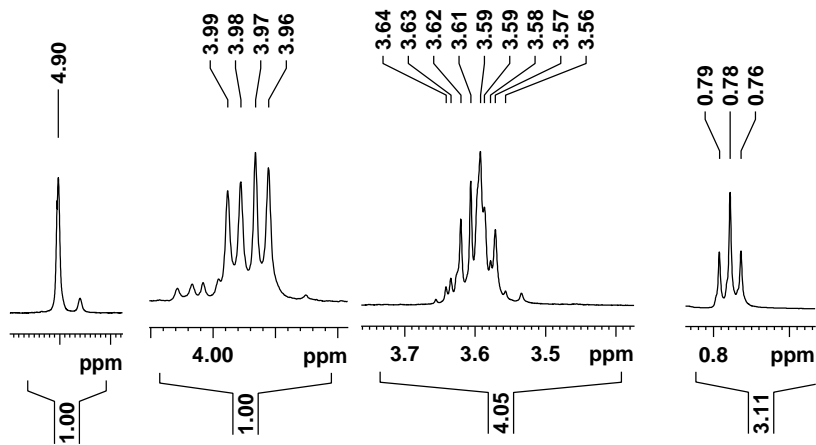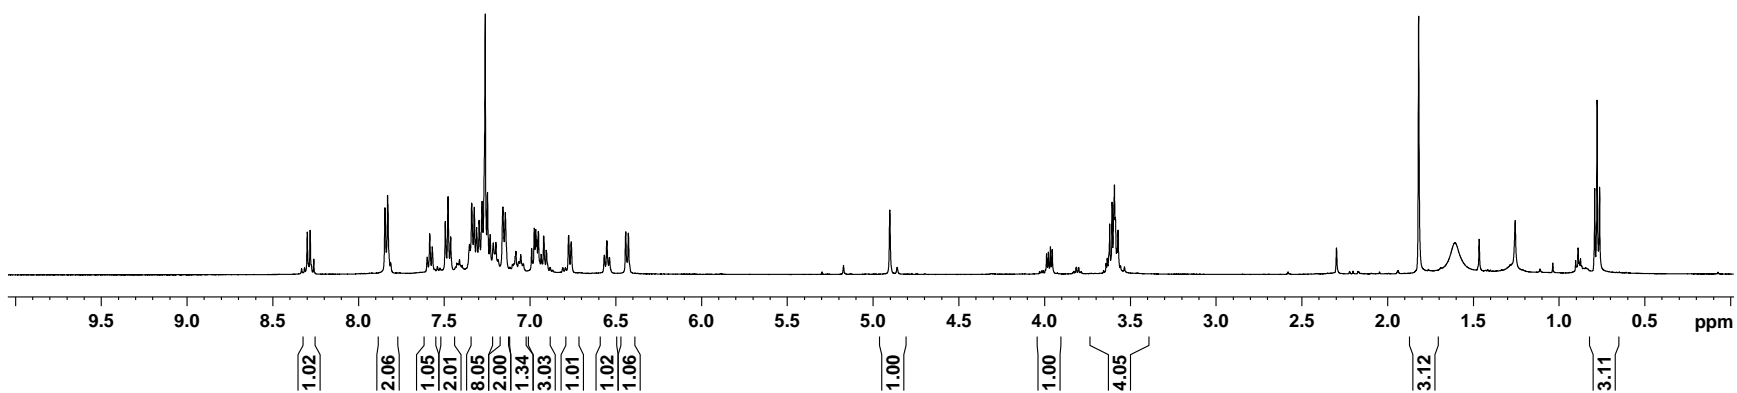

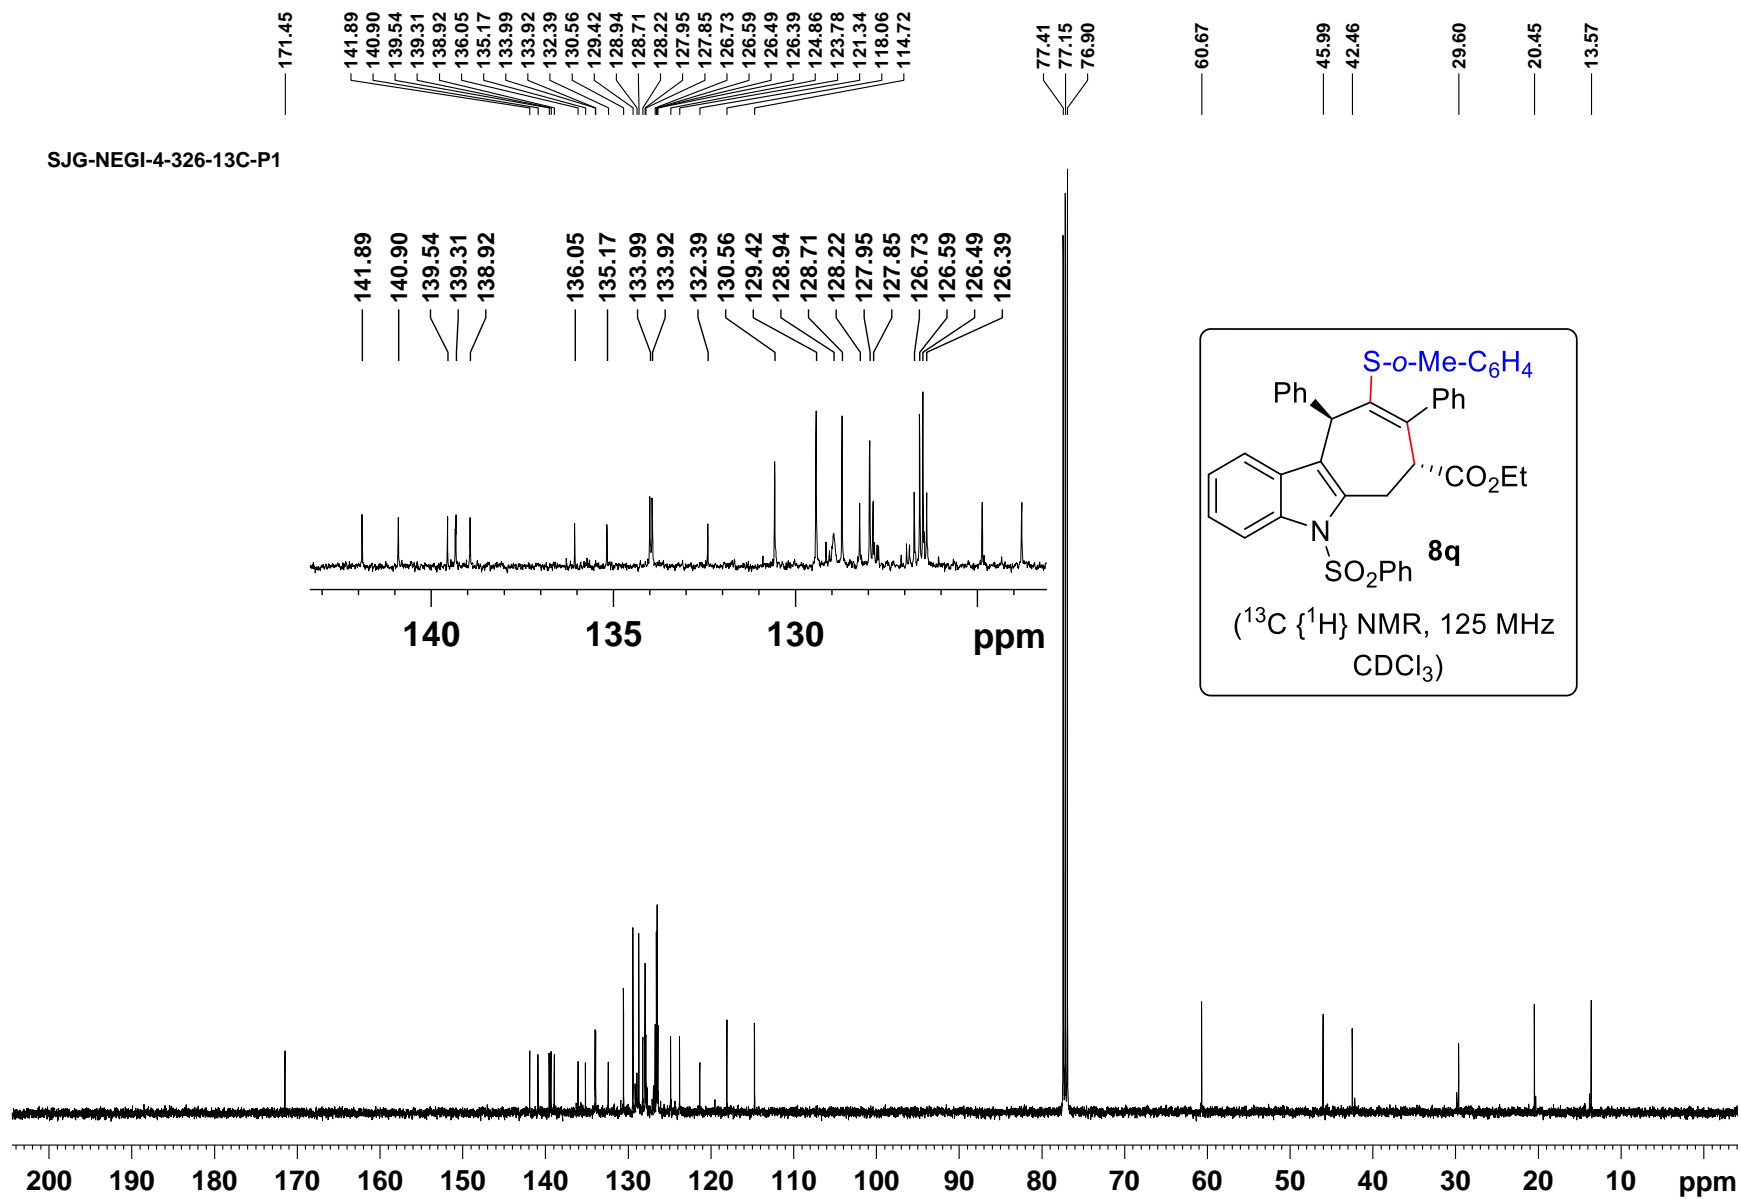

SJG-NEGI-4-321-3-1H

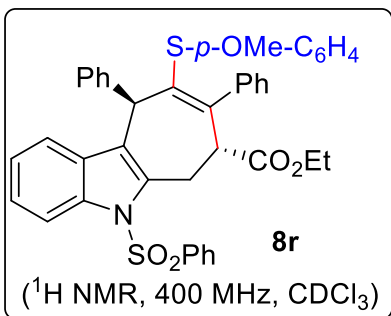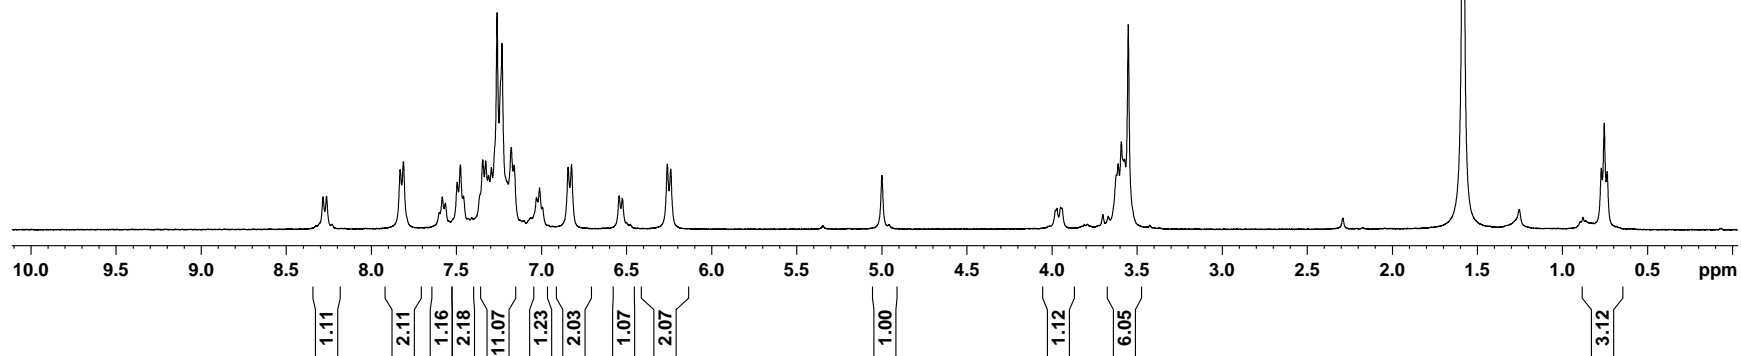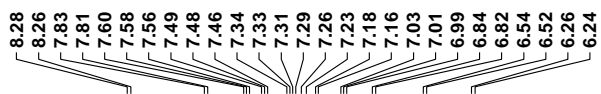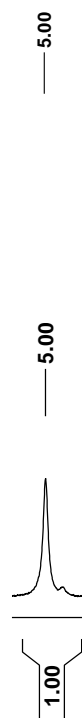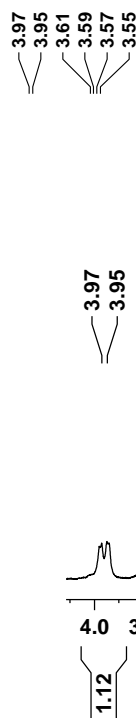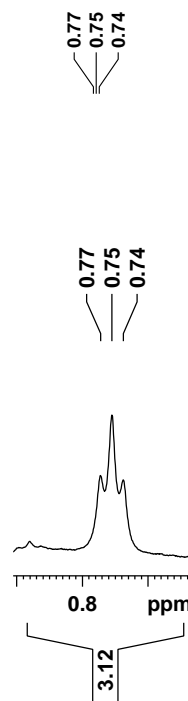

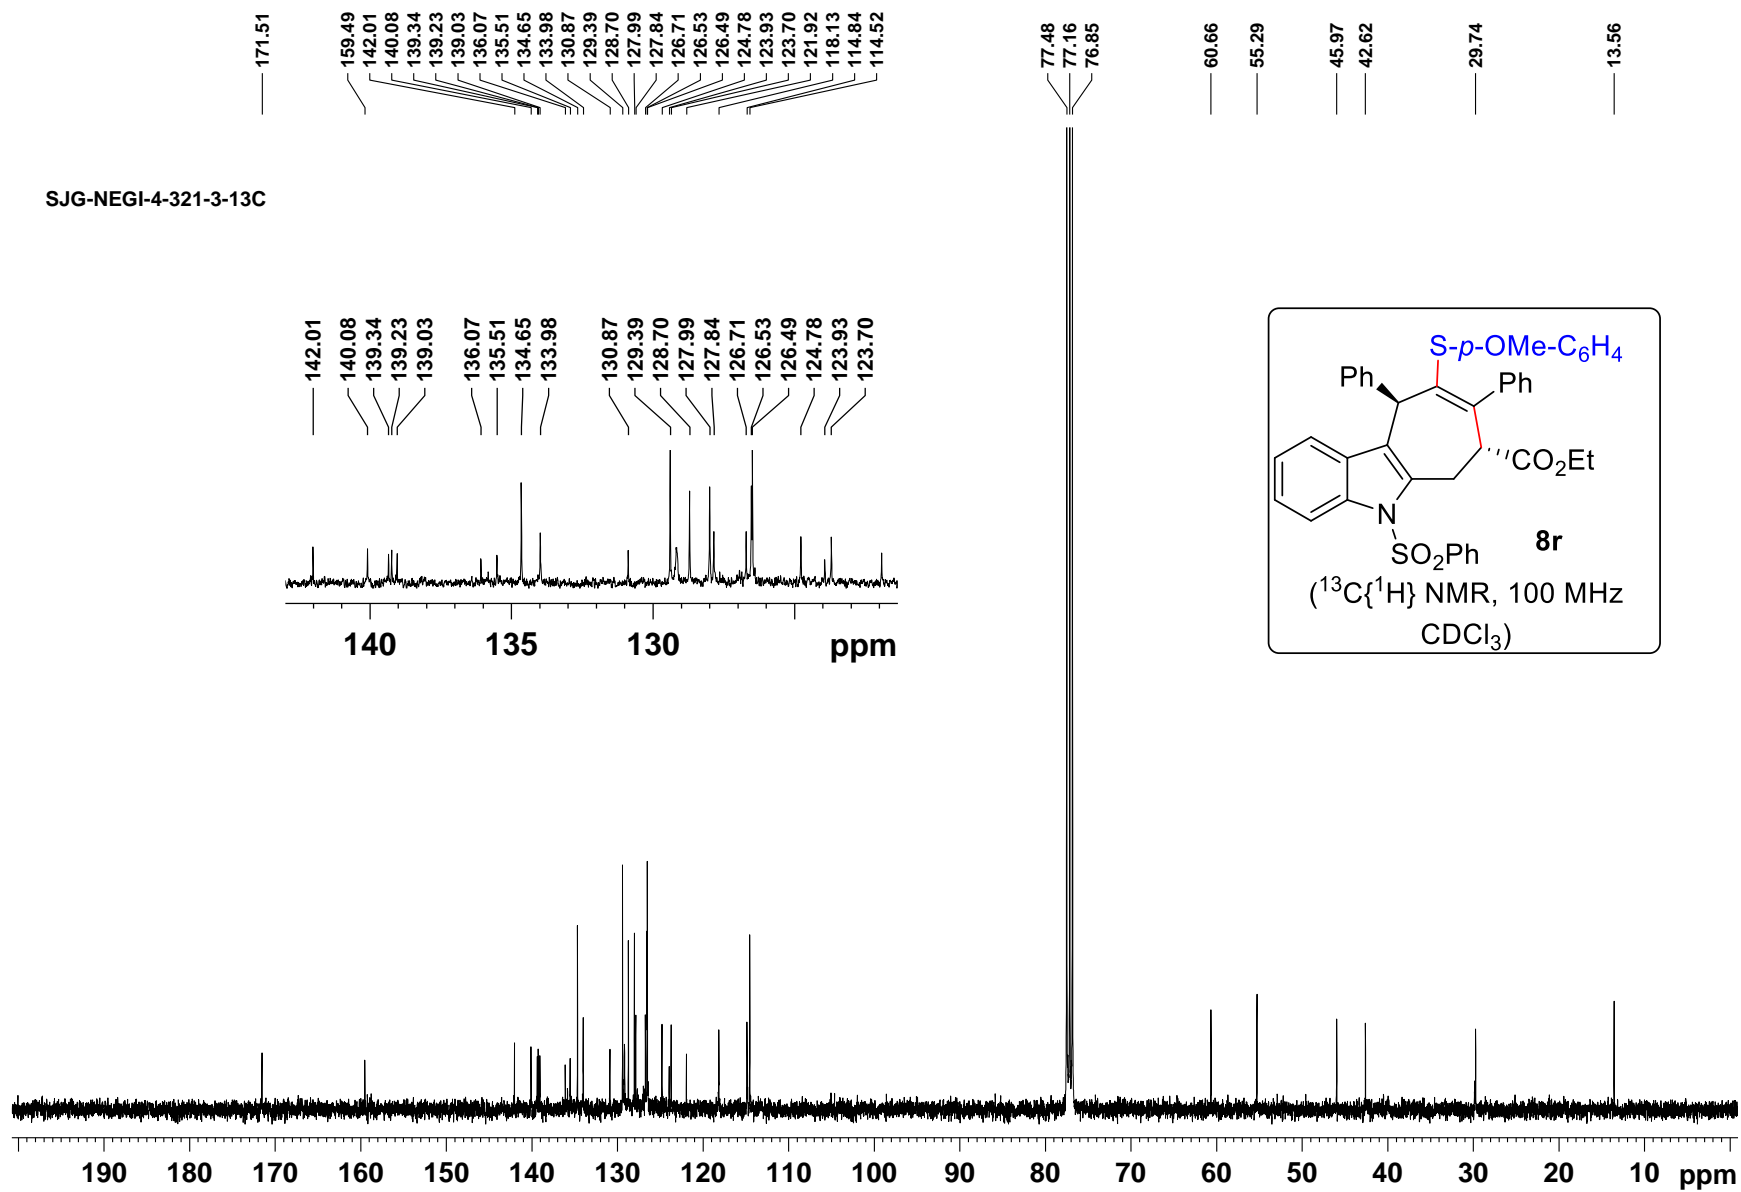



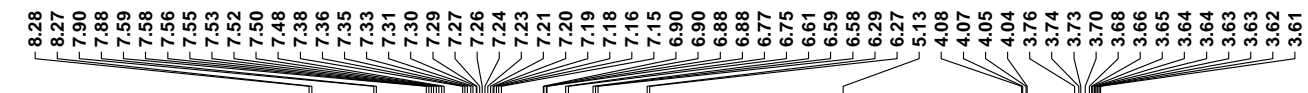

SJG-NEGI-4-329-1H-P1

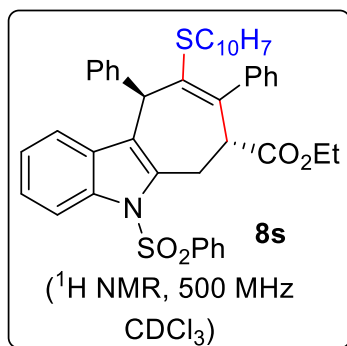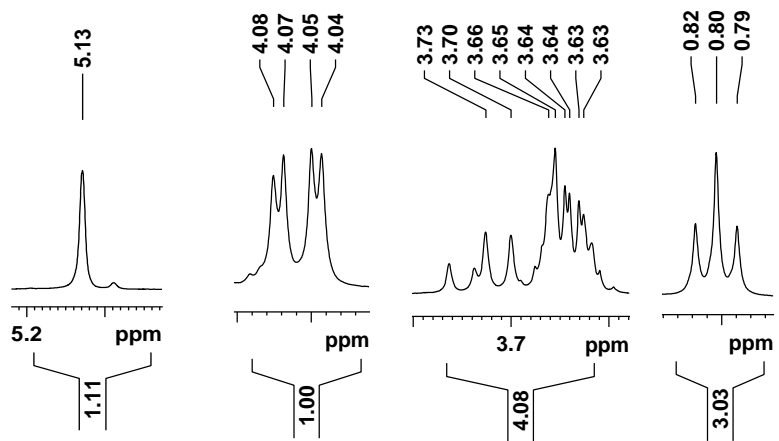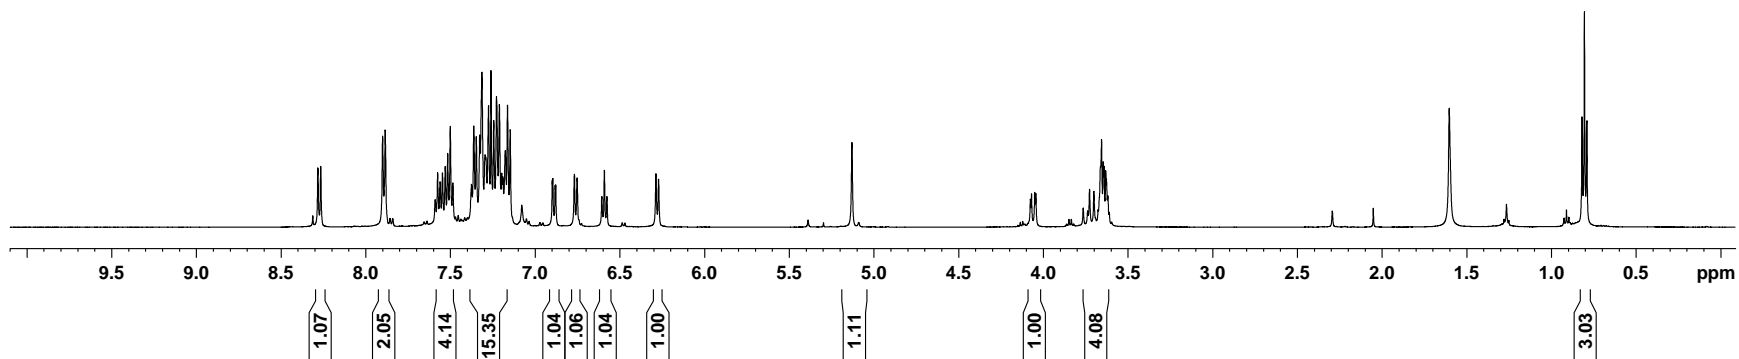

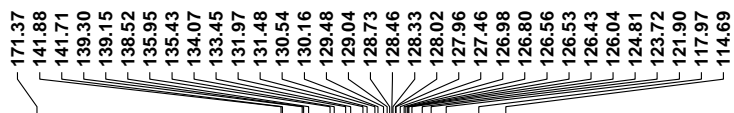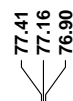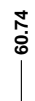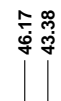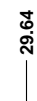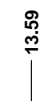

SJG-NEGI-4-329-1H-P1-13C

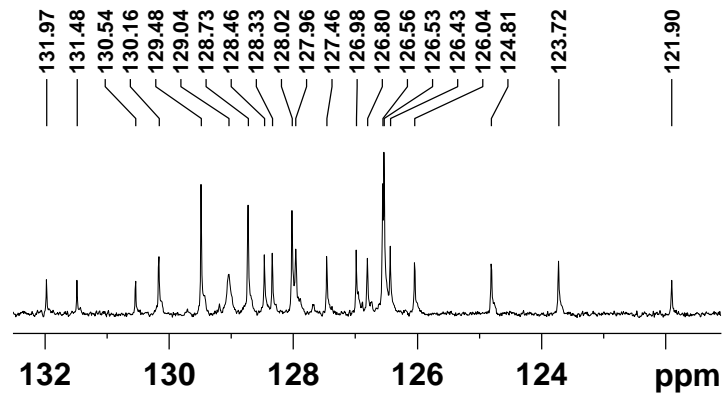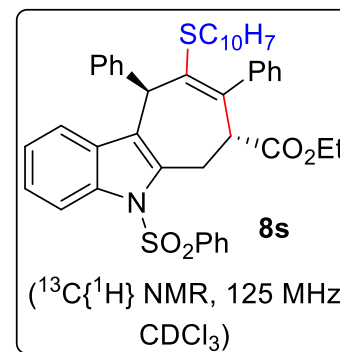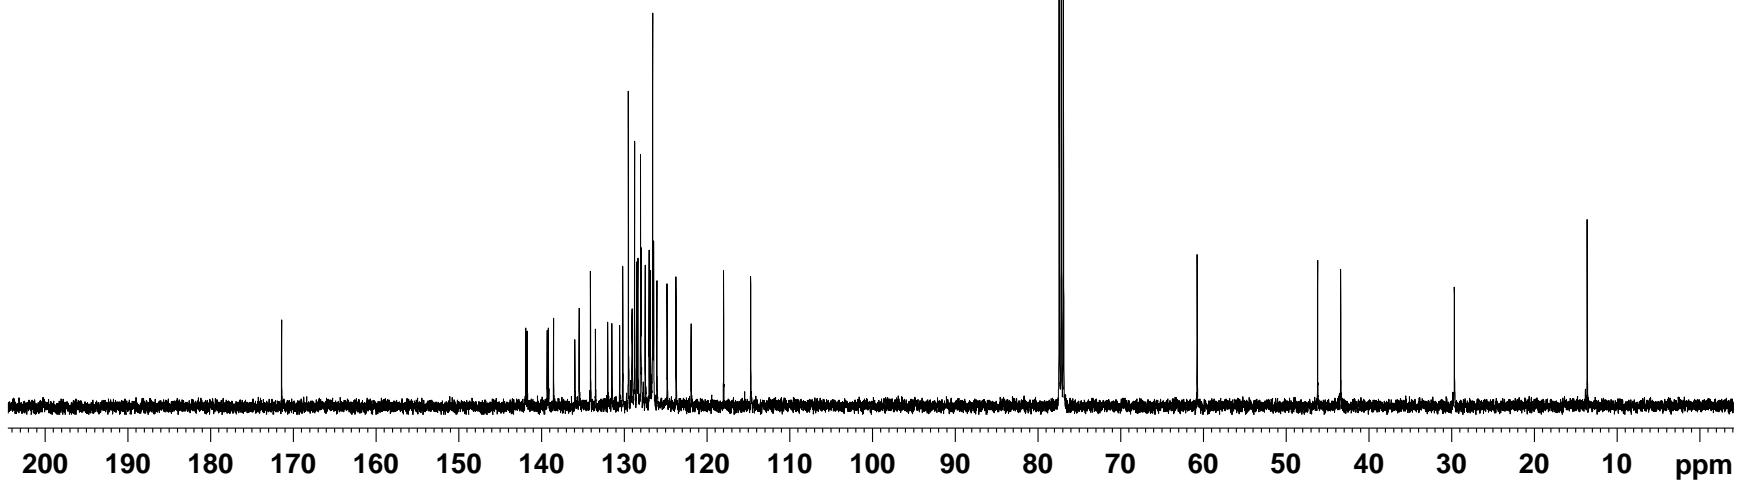

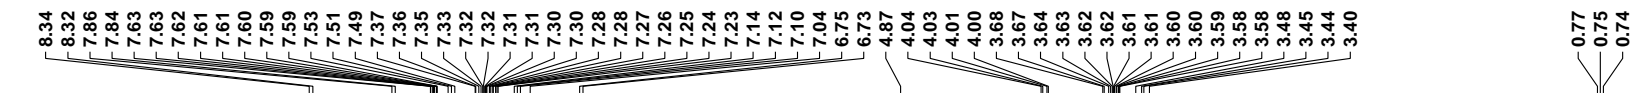

SJG-NEGI-4-325-1-1H

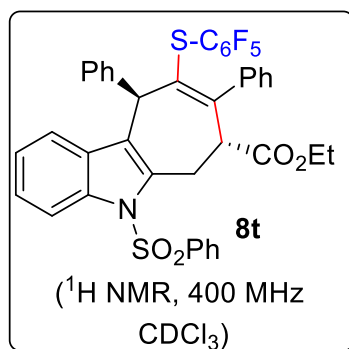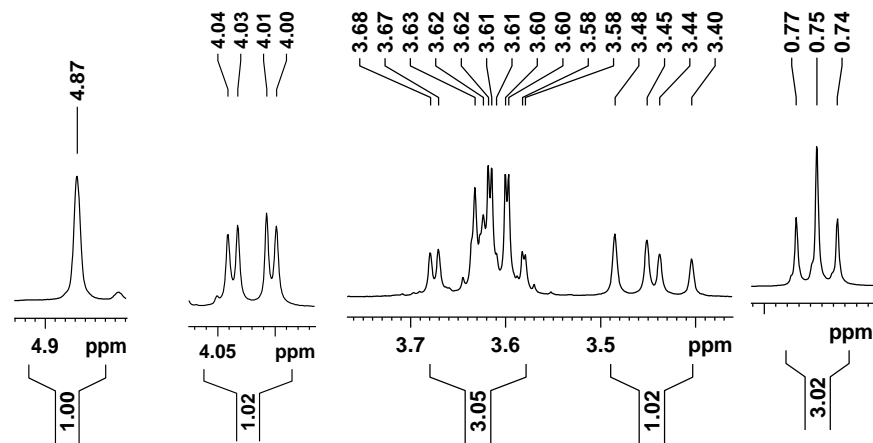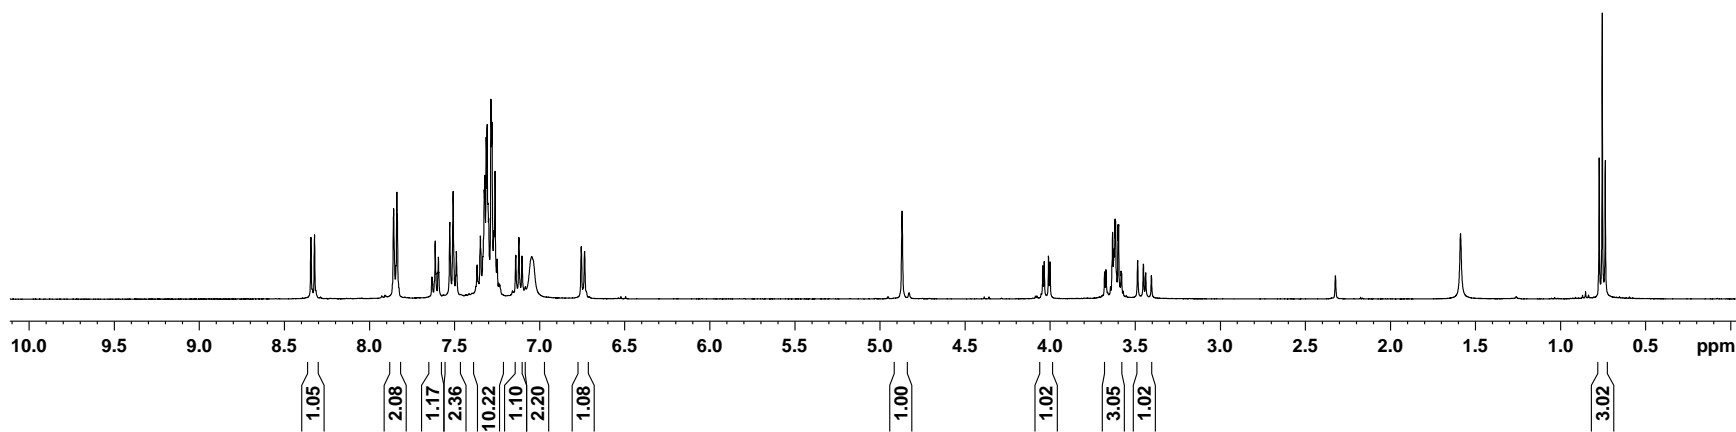

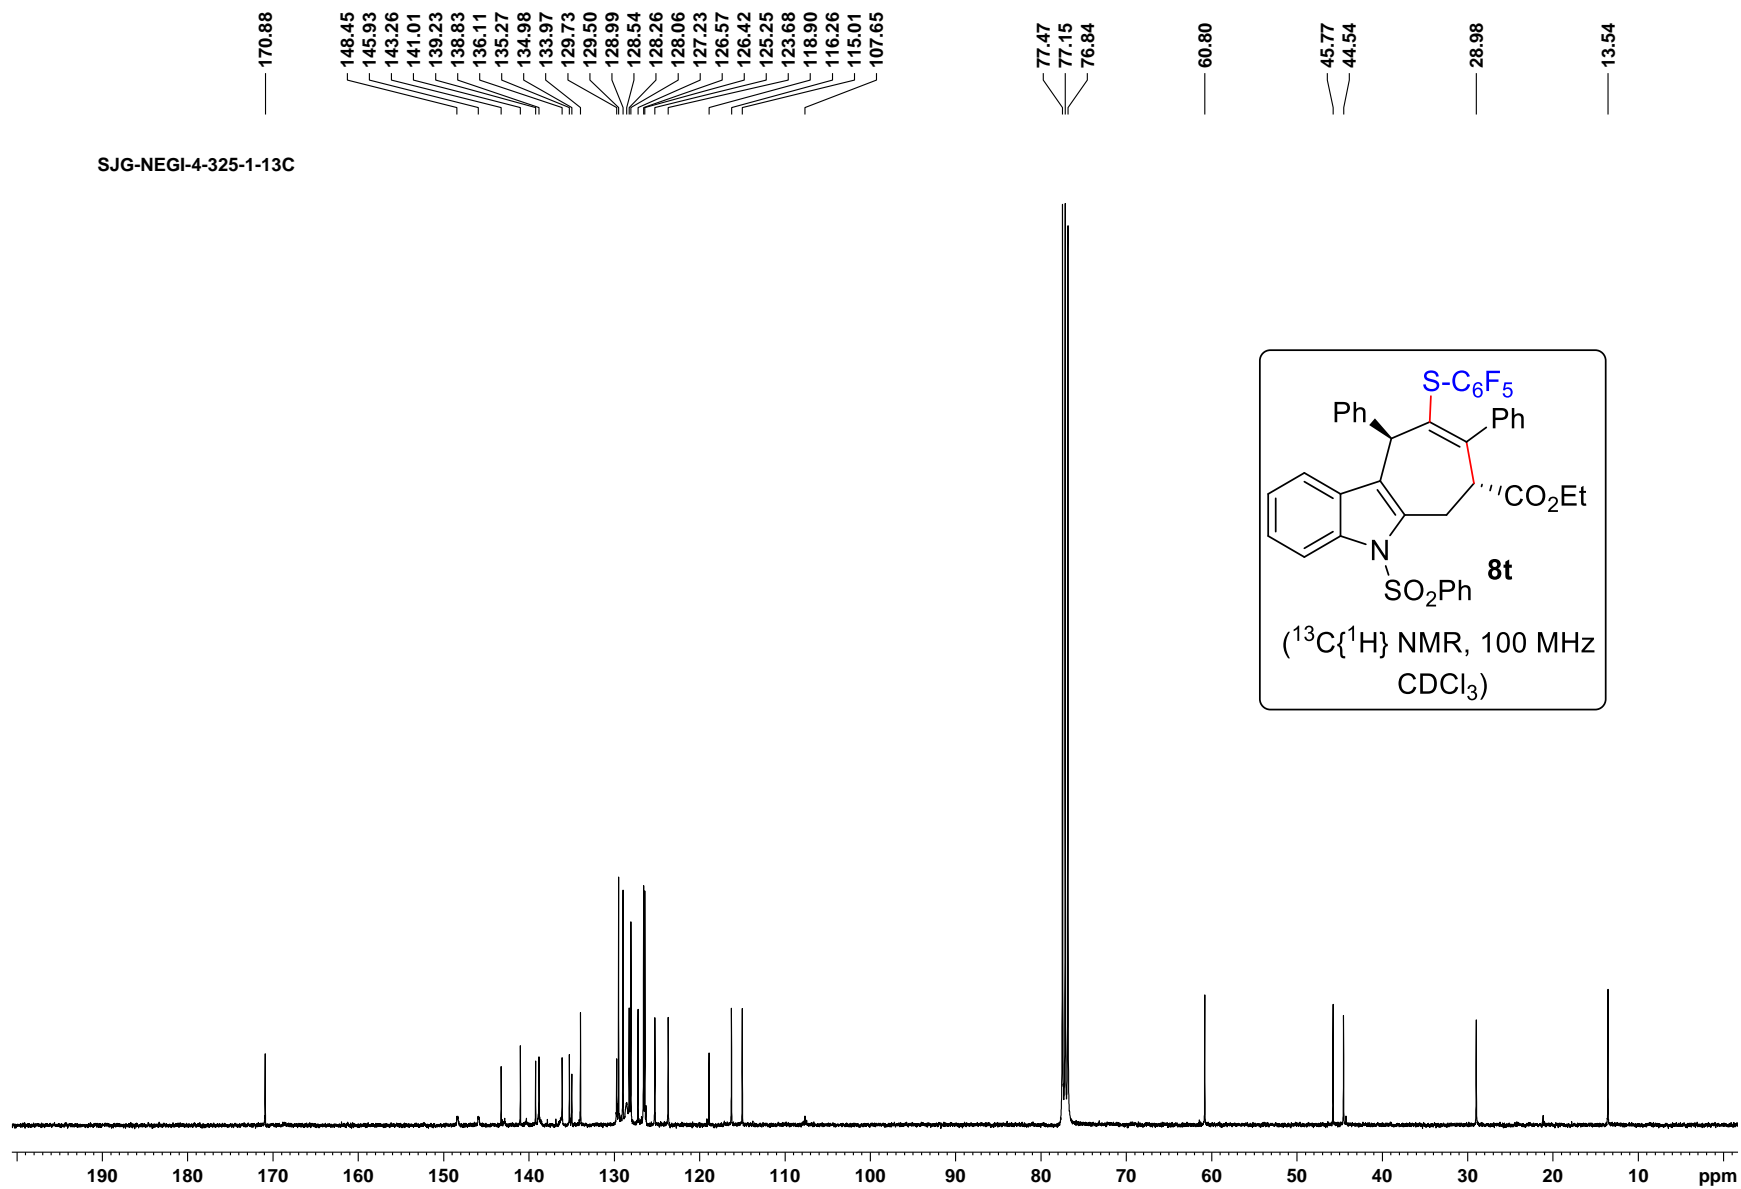

SJG-NEGI-4-325-1-19F

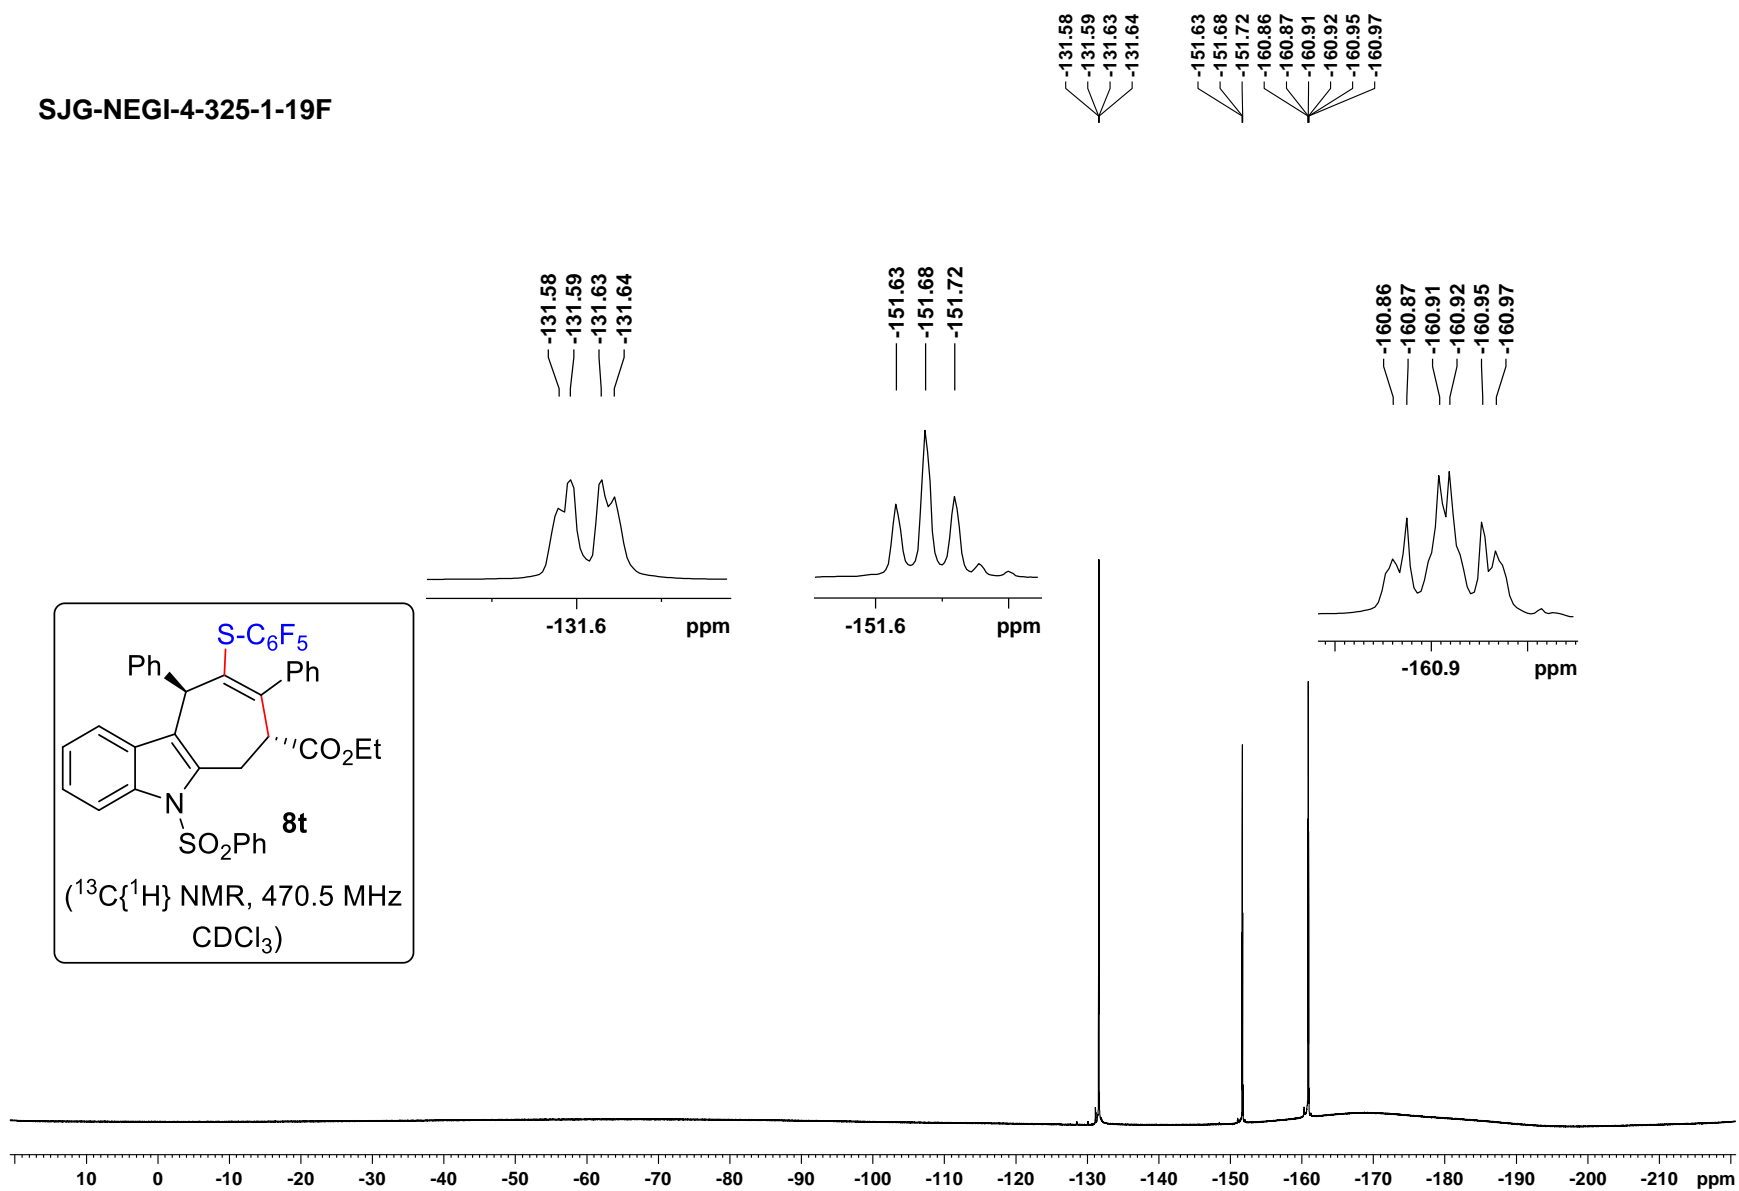

SJG-NEGI-325-2-1H

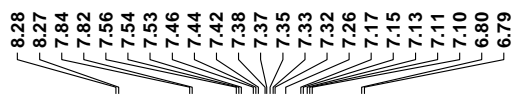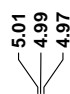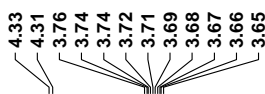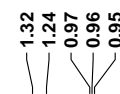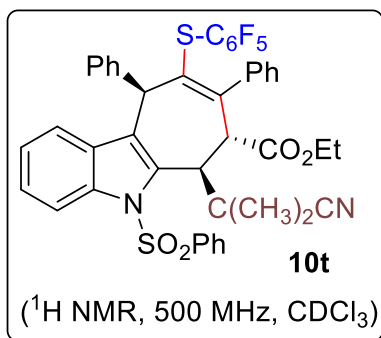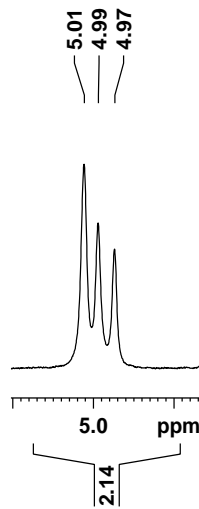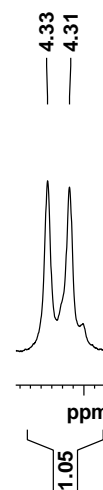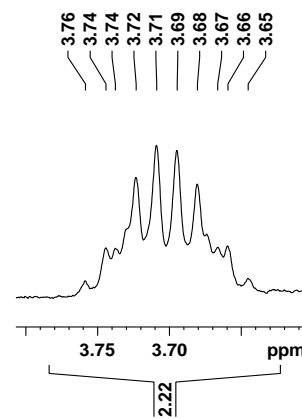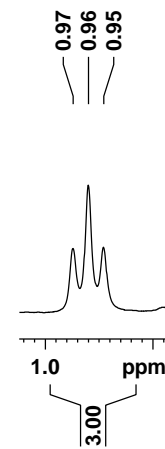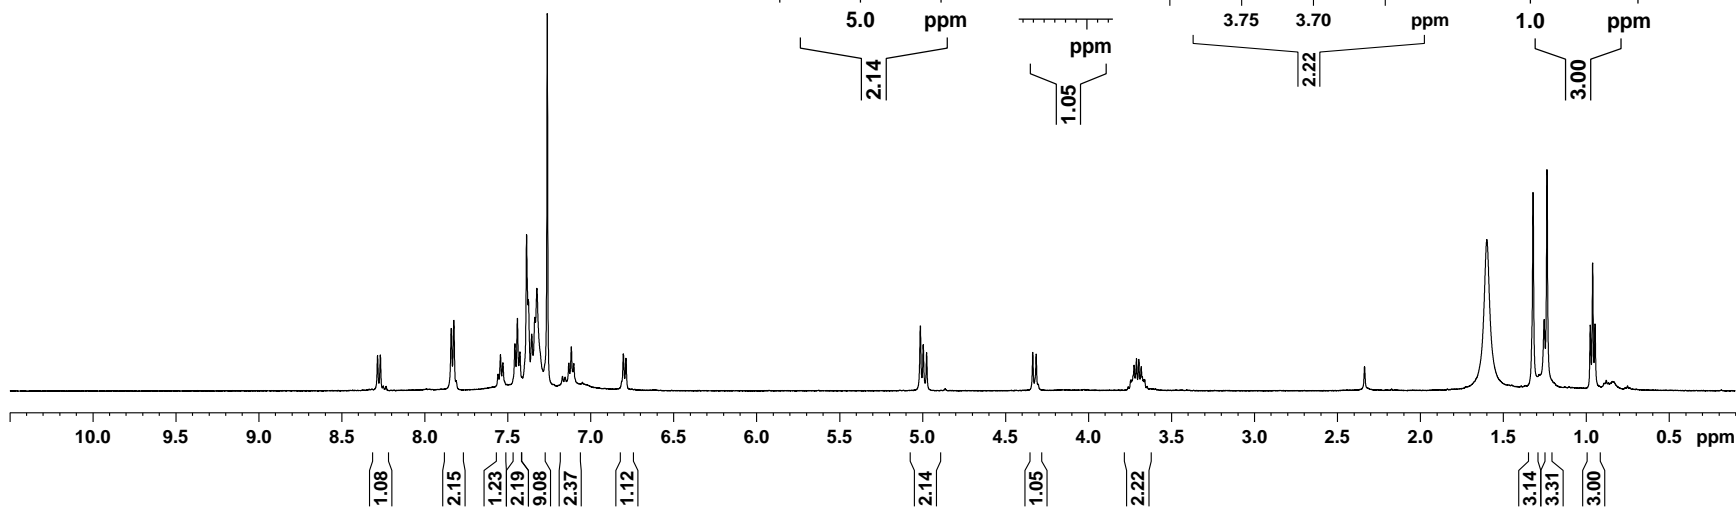

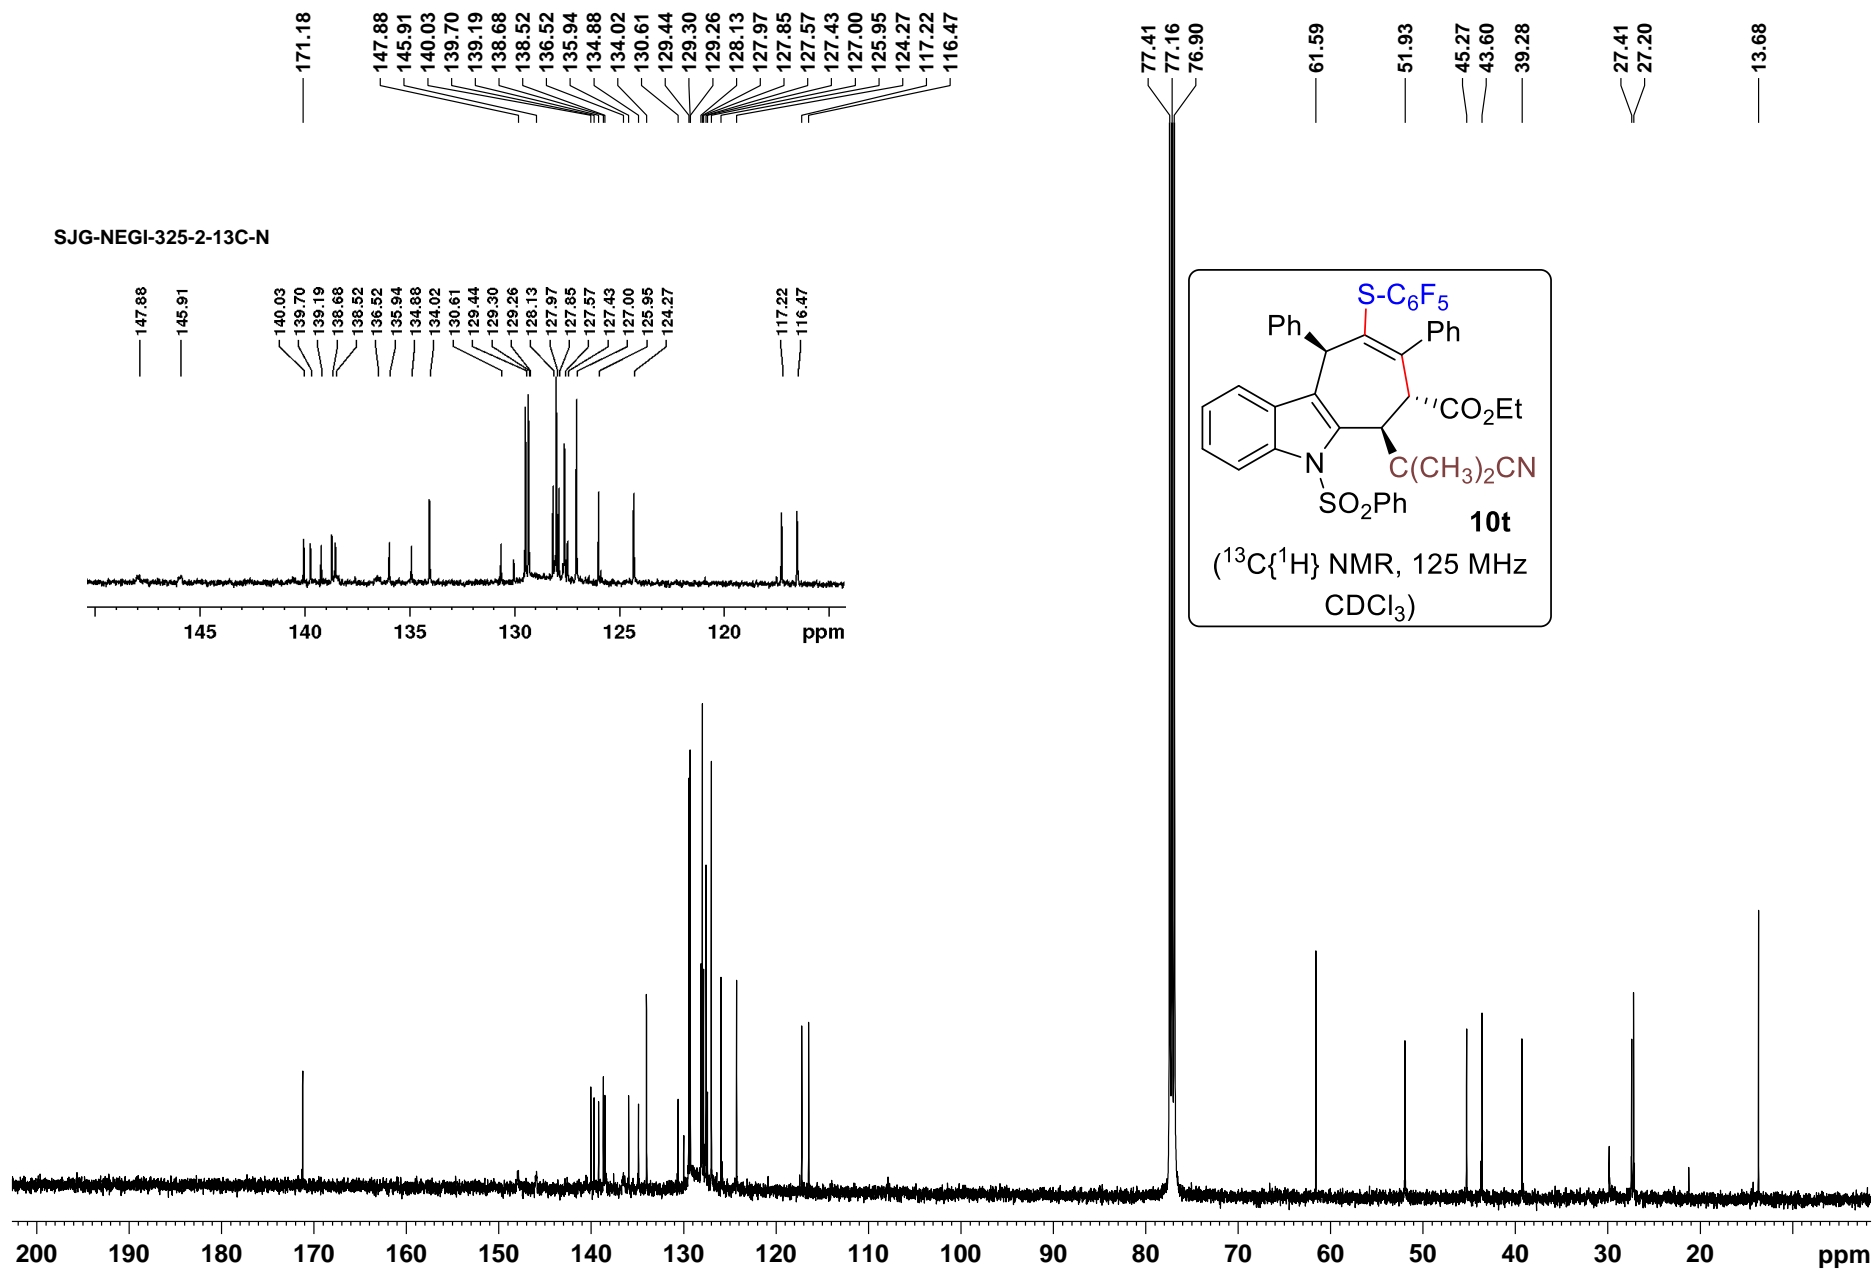

SJG-NEGI-325-2-19F

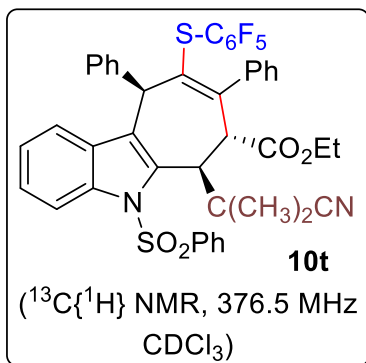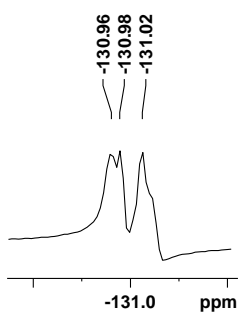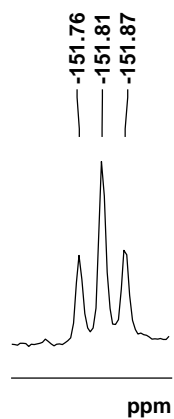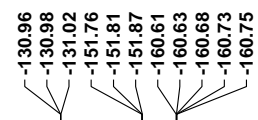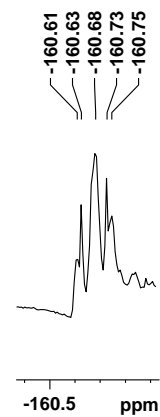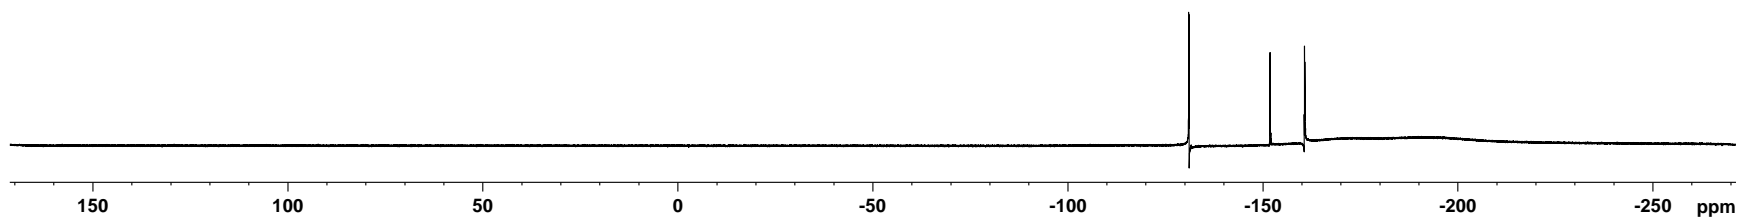



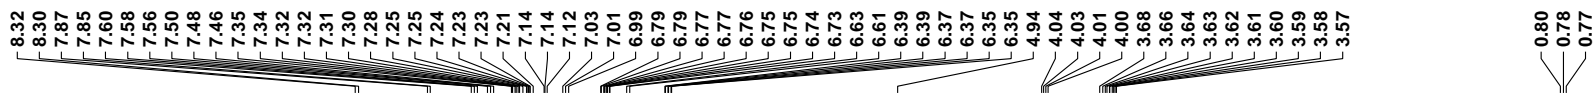

SJG-NEGI-323-2-1H-P

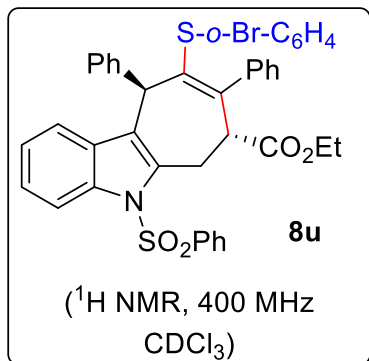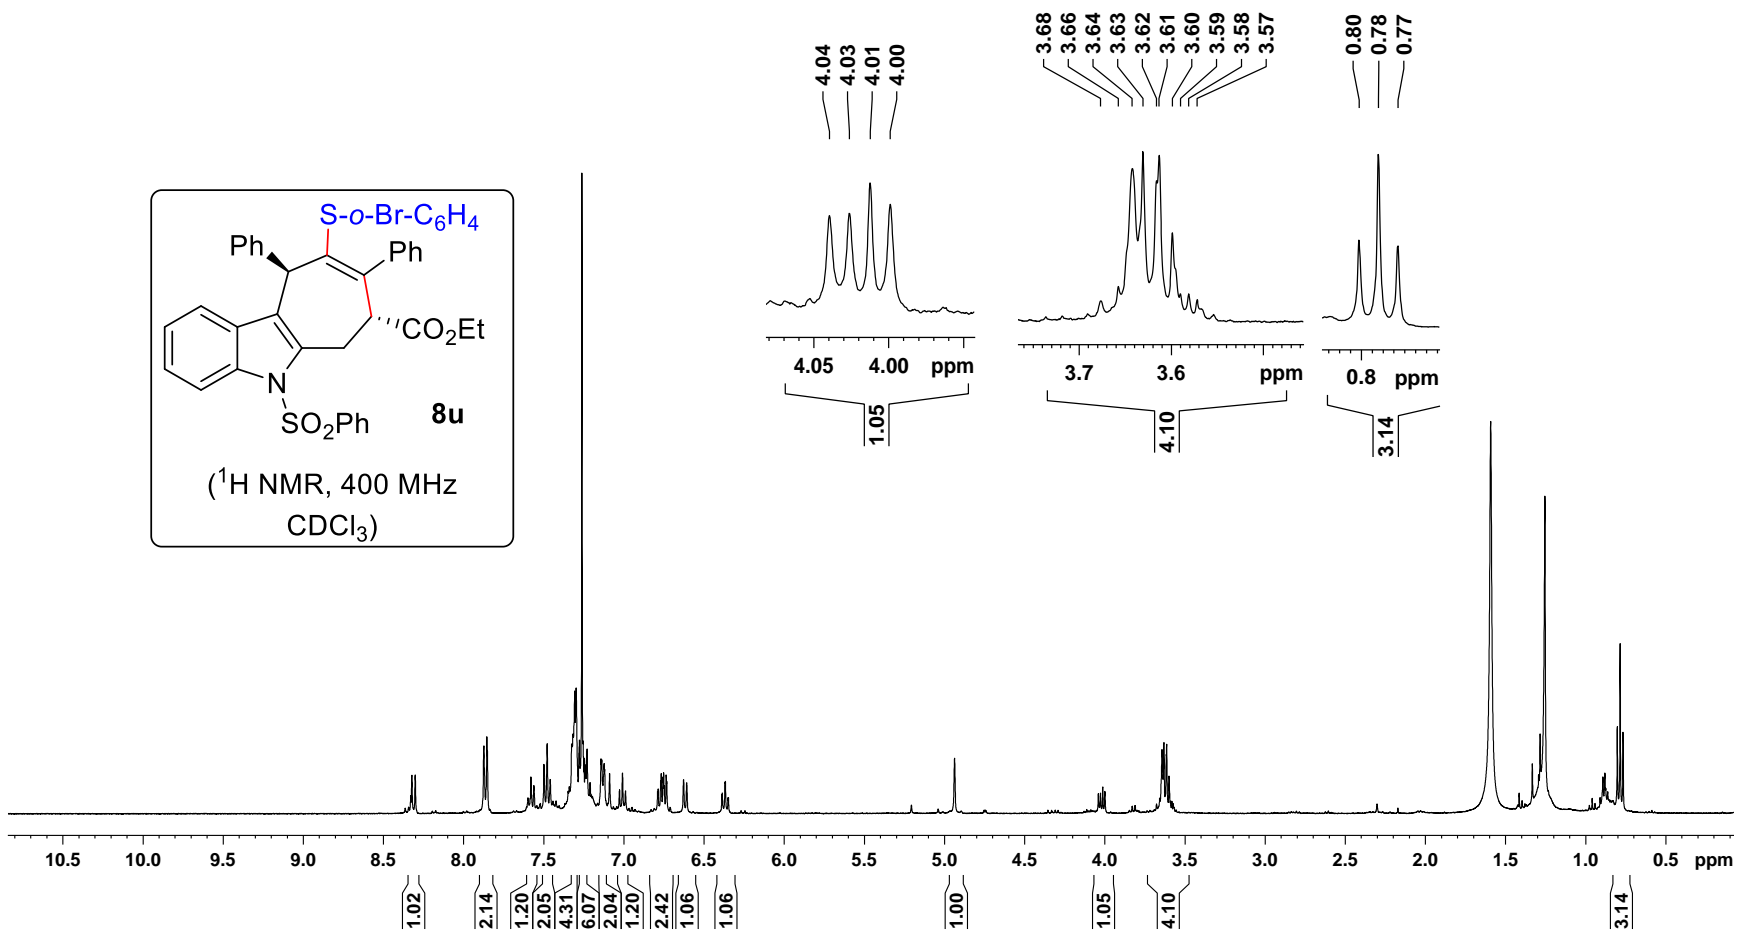

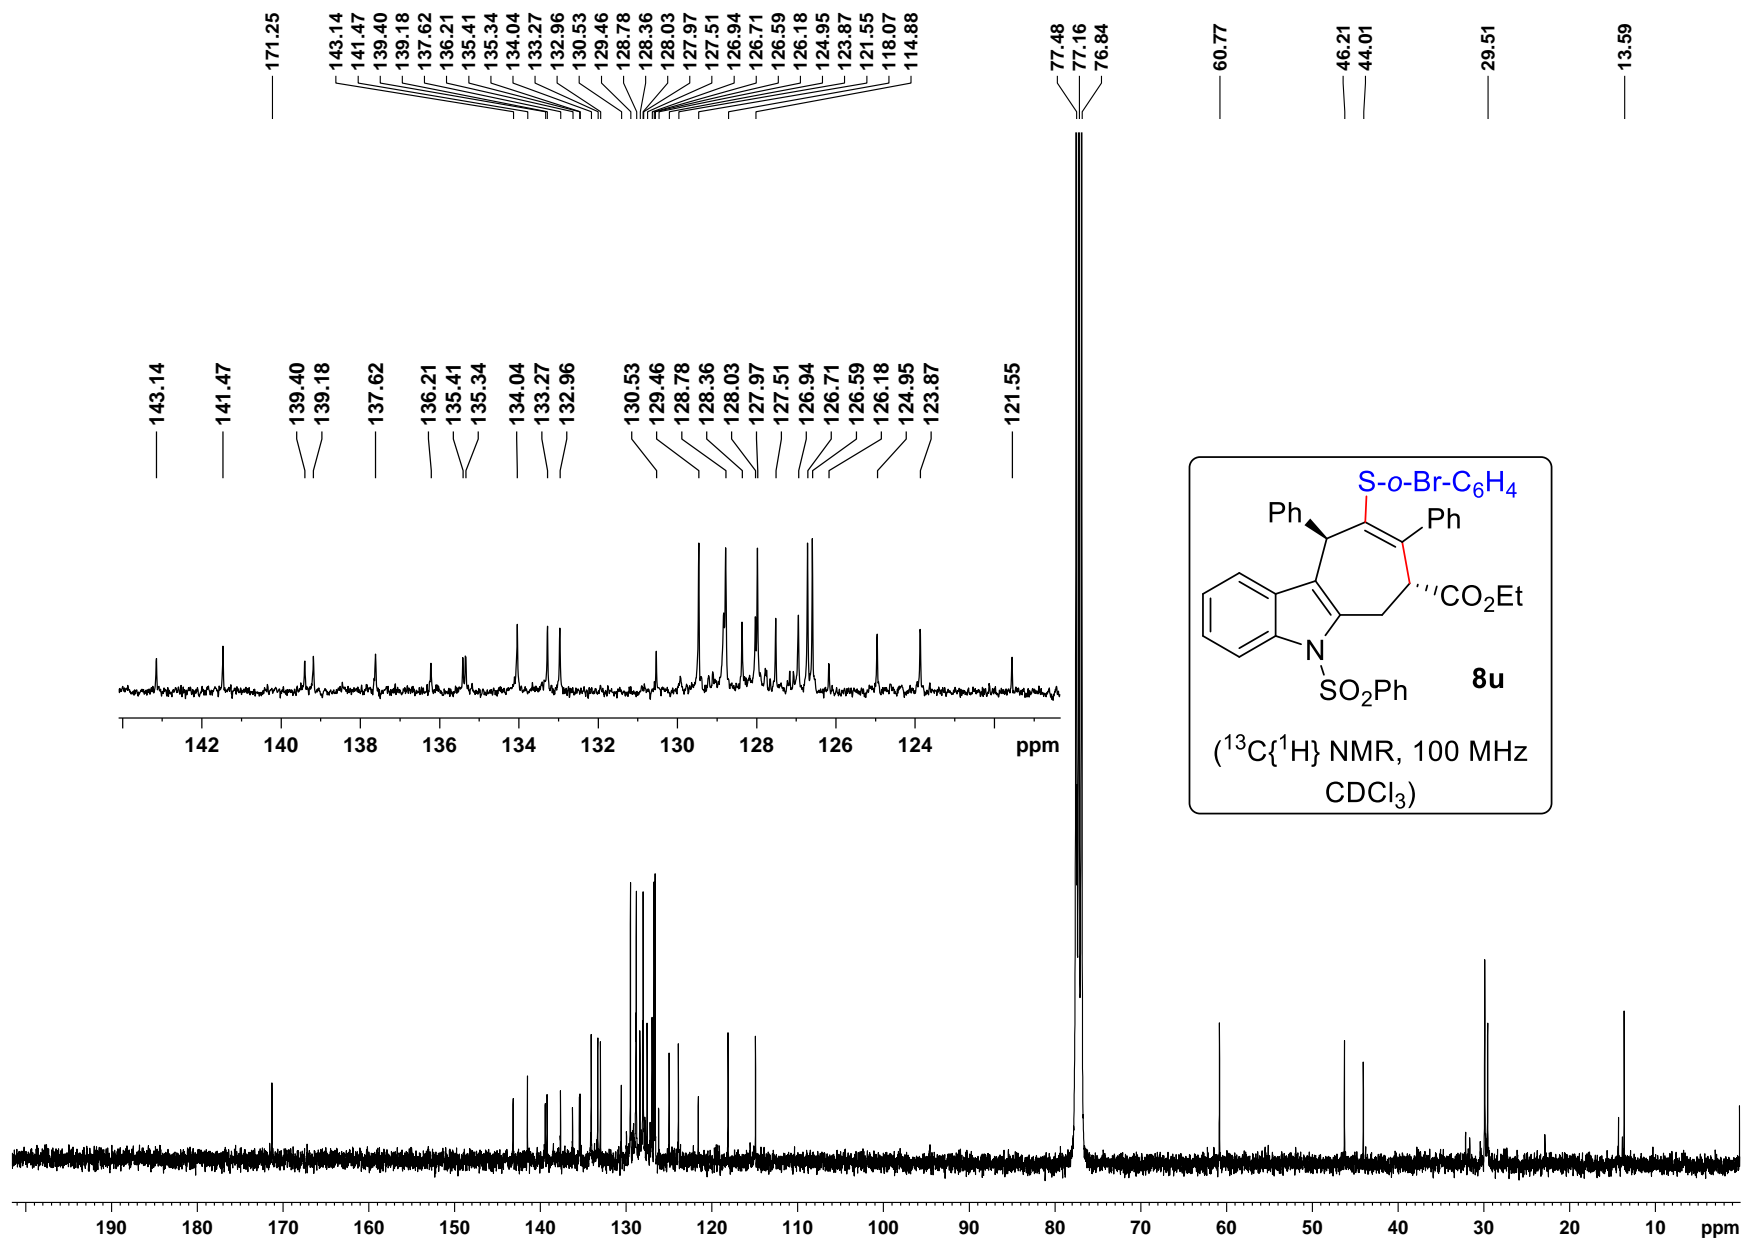

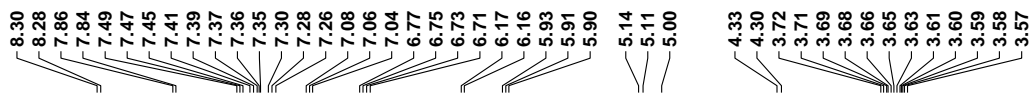

SJG-NEGI-323-3-PP-1H

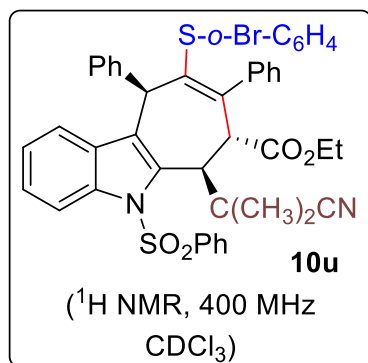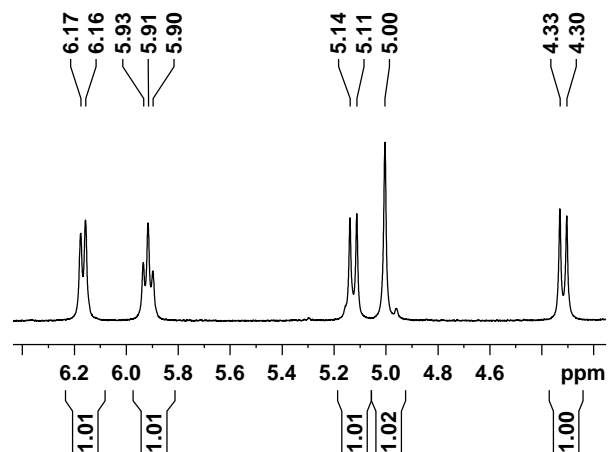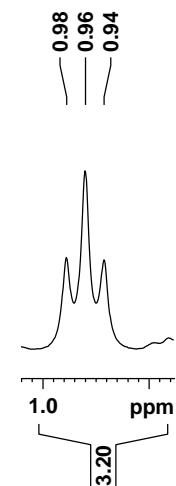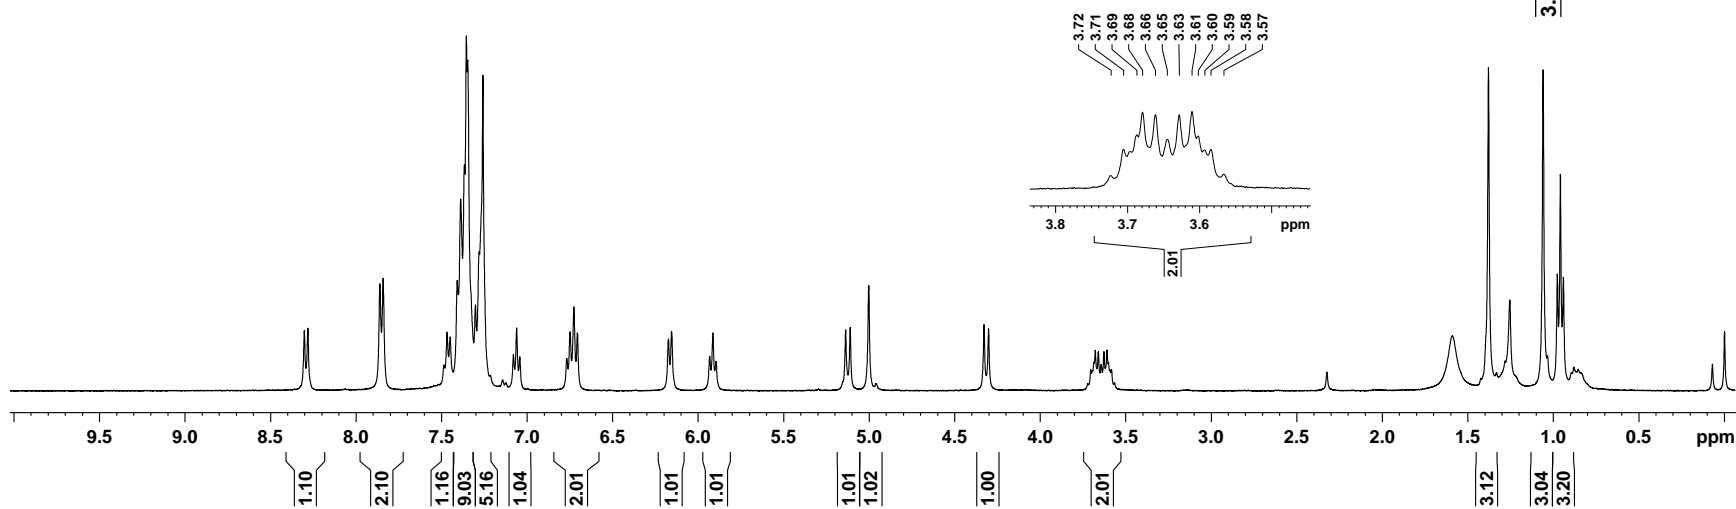

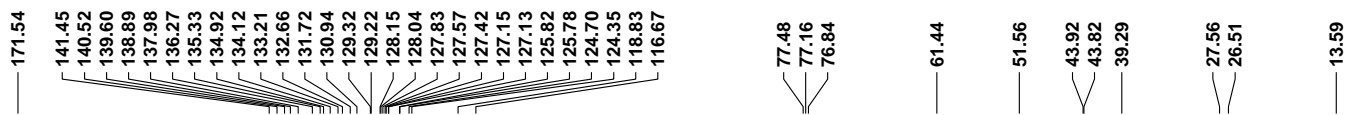

SJG-NEGI-4-323-3-13C

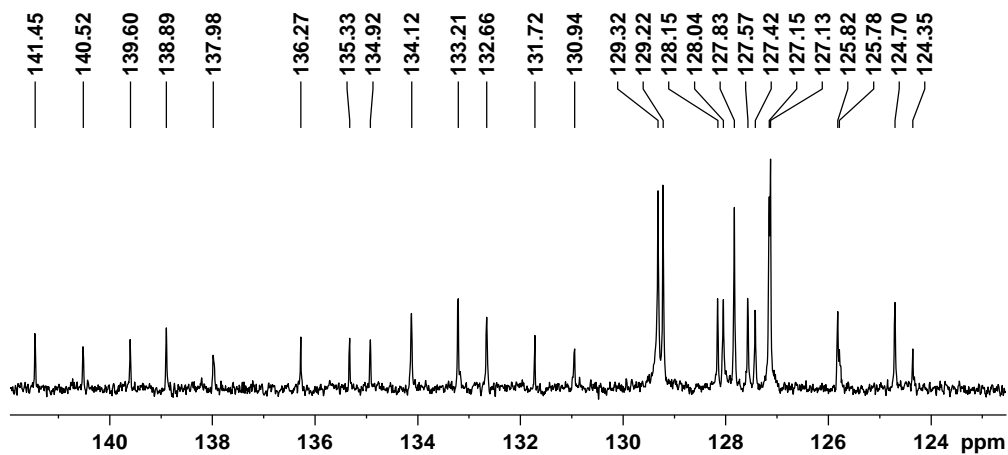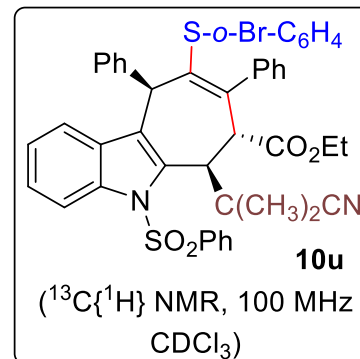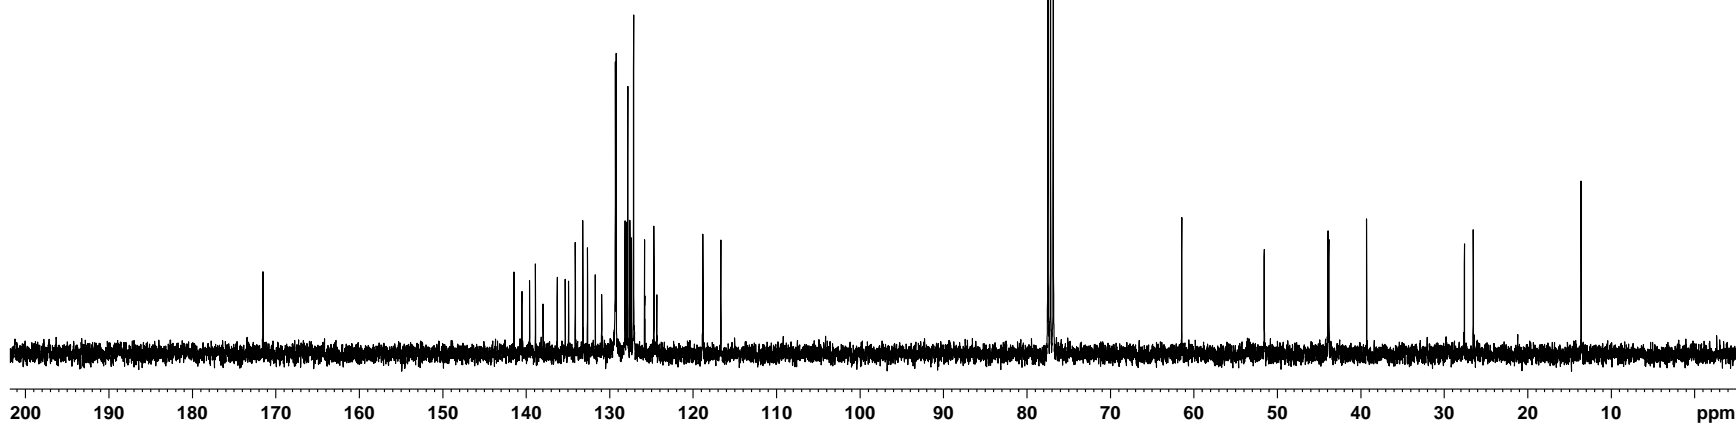

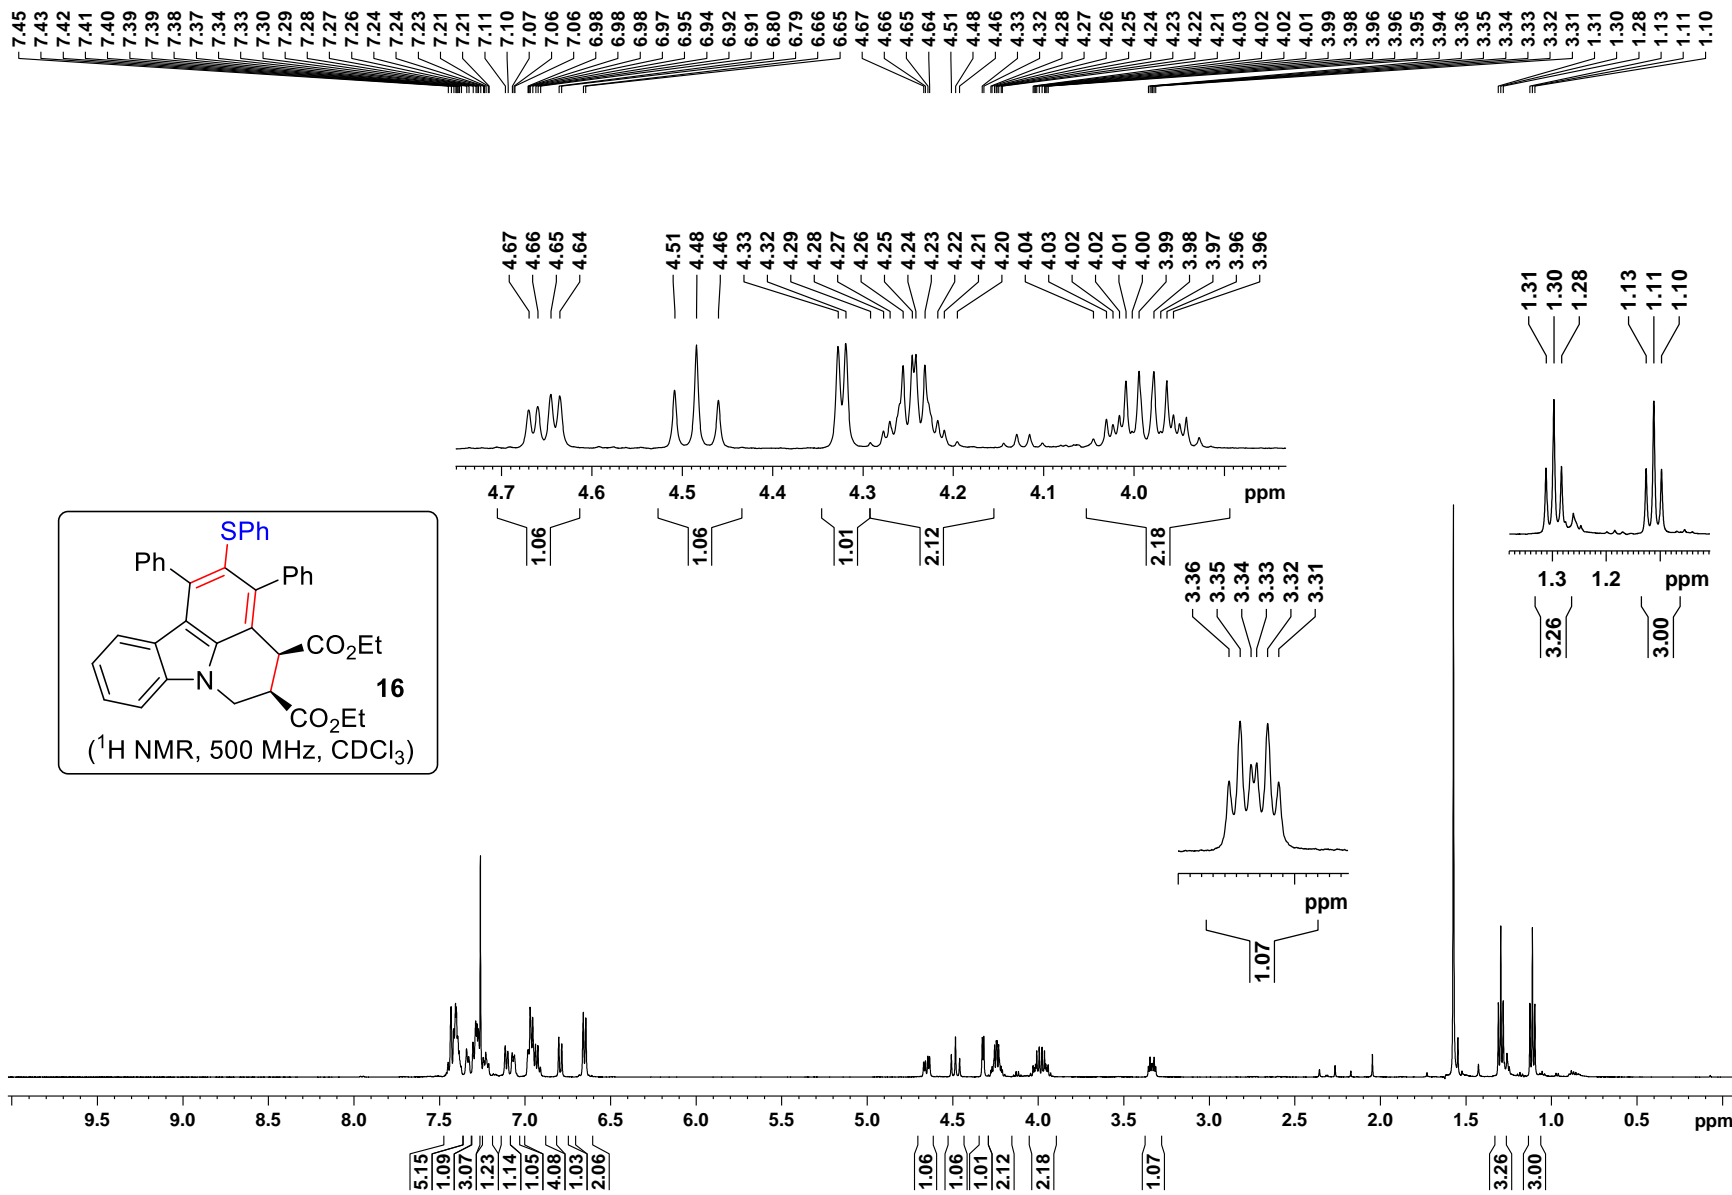

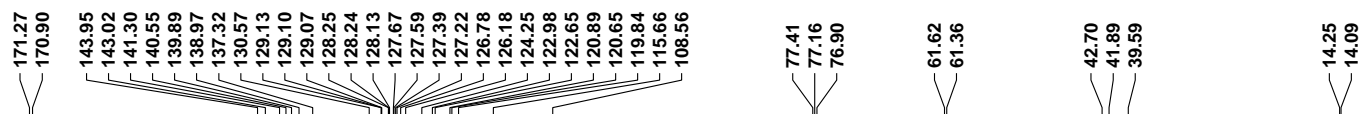

SJG-NEGI-1-61-3P-13C

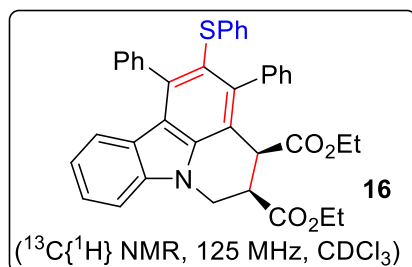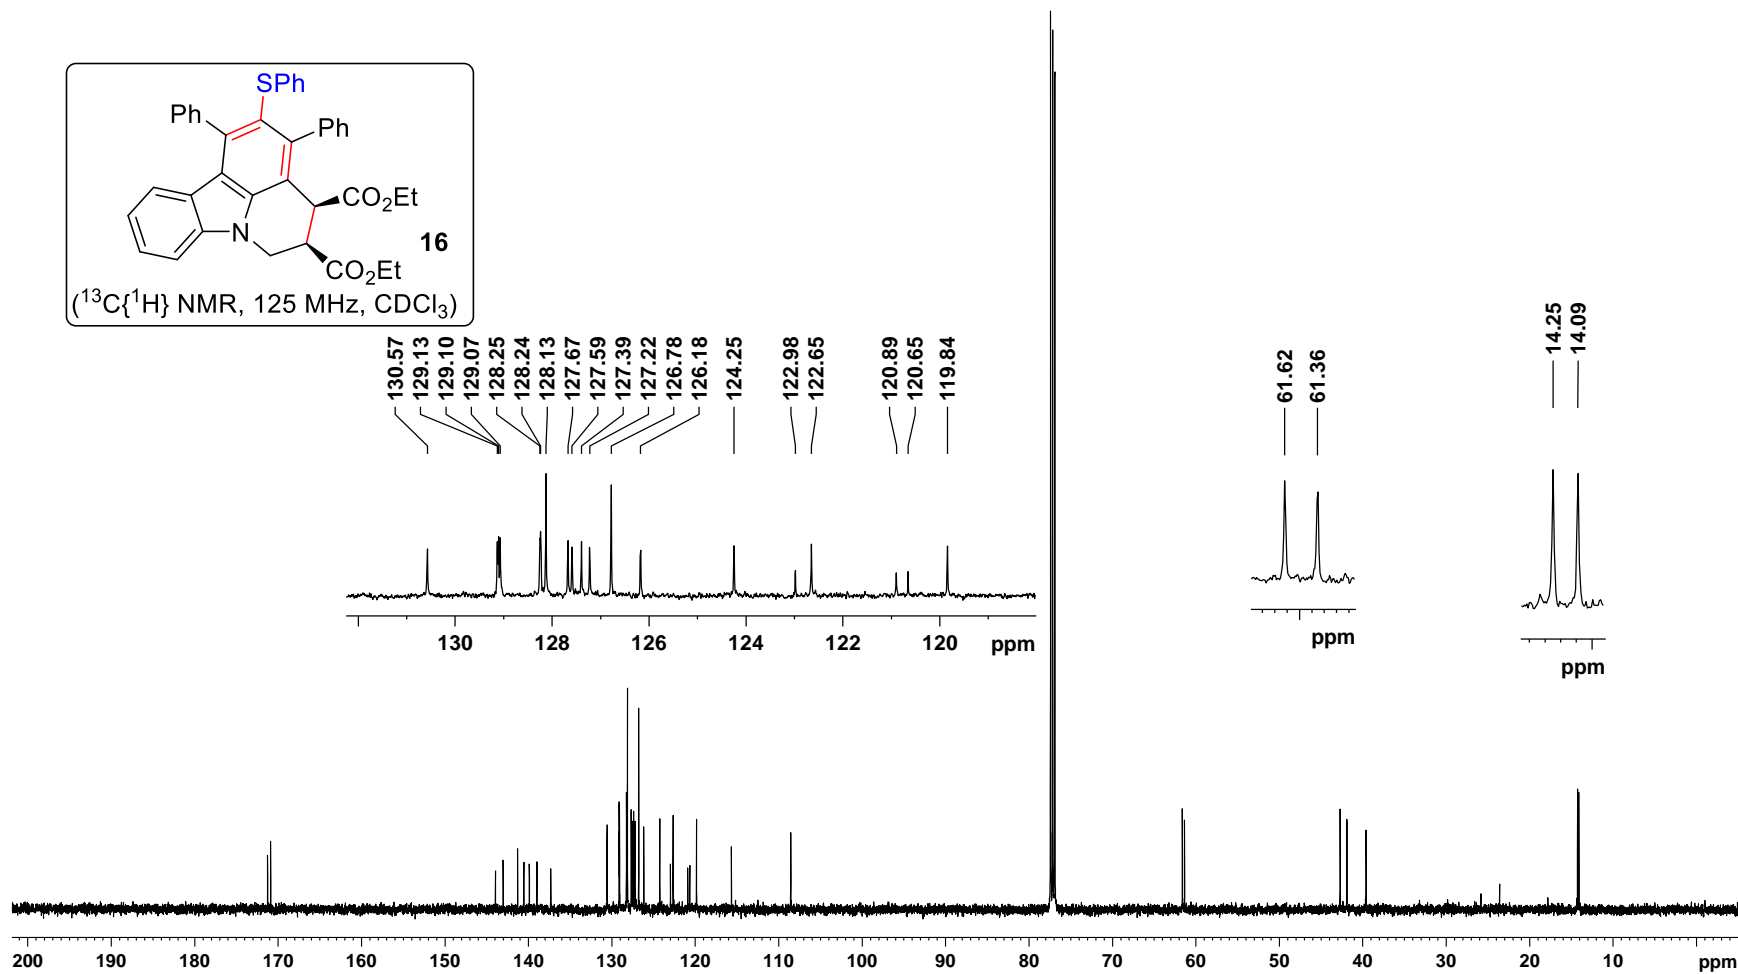

SJG-NEGI-1-61-3P-HHCOSY

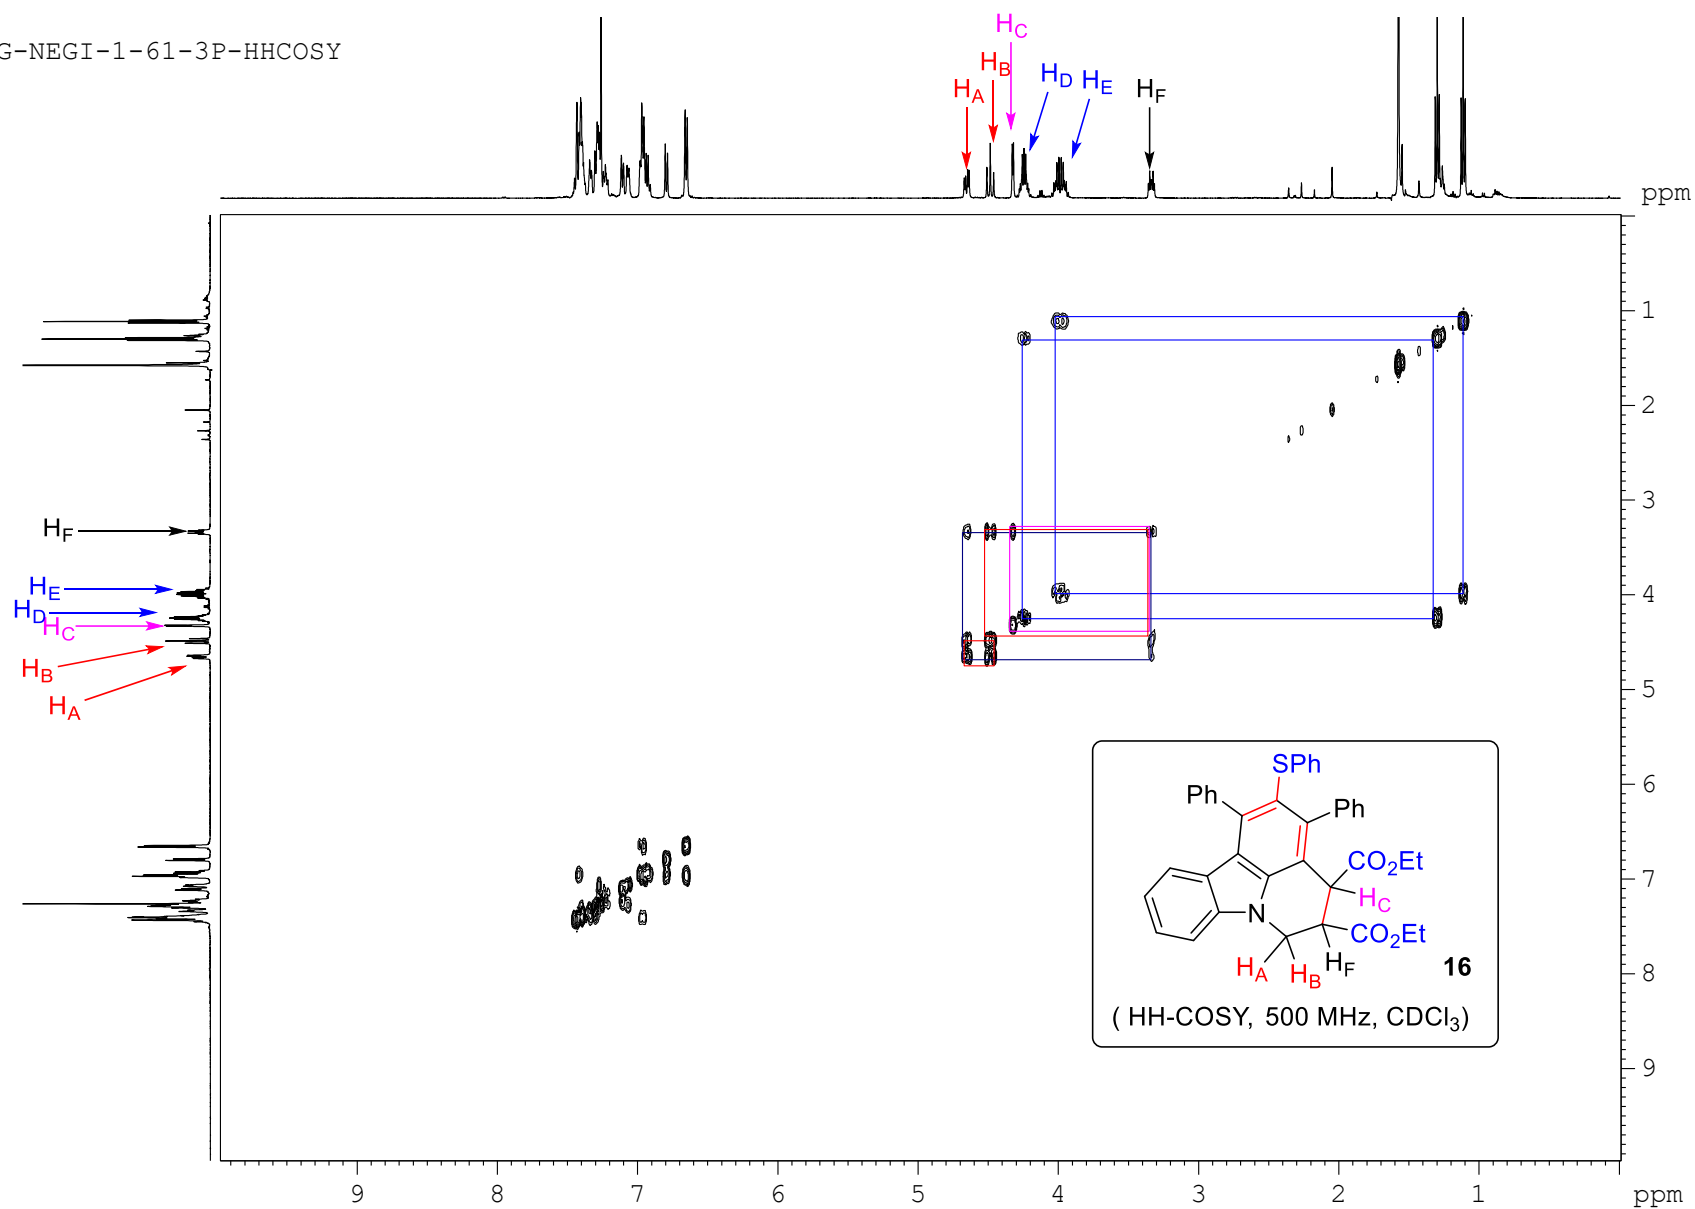

SJG-NEGI-1-61-3P-HSQC

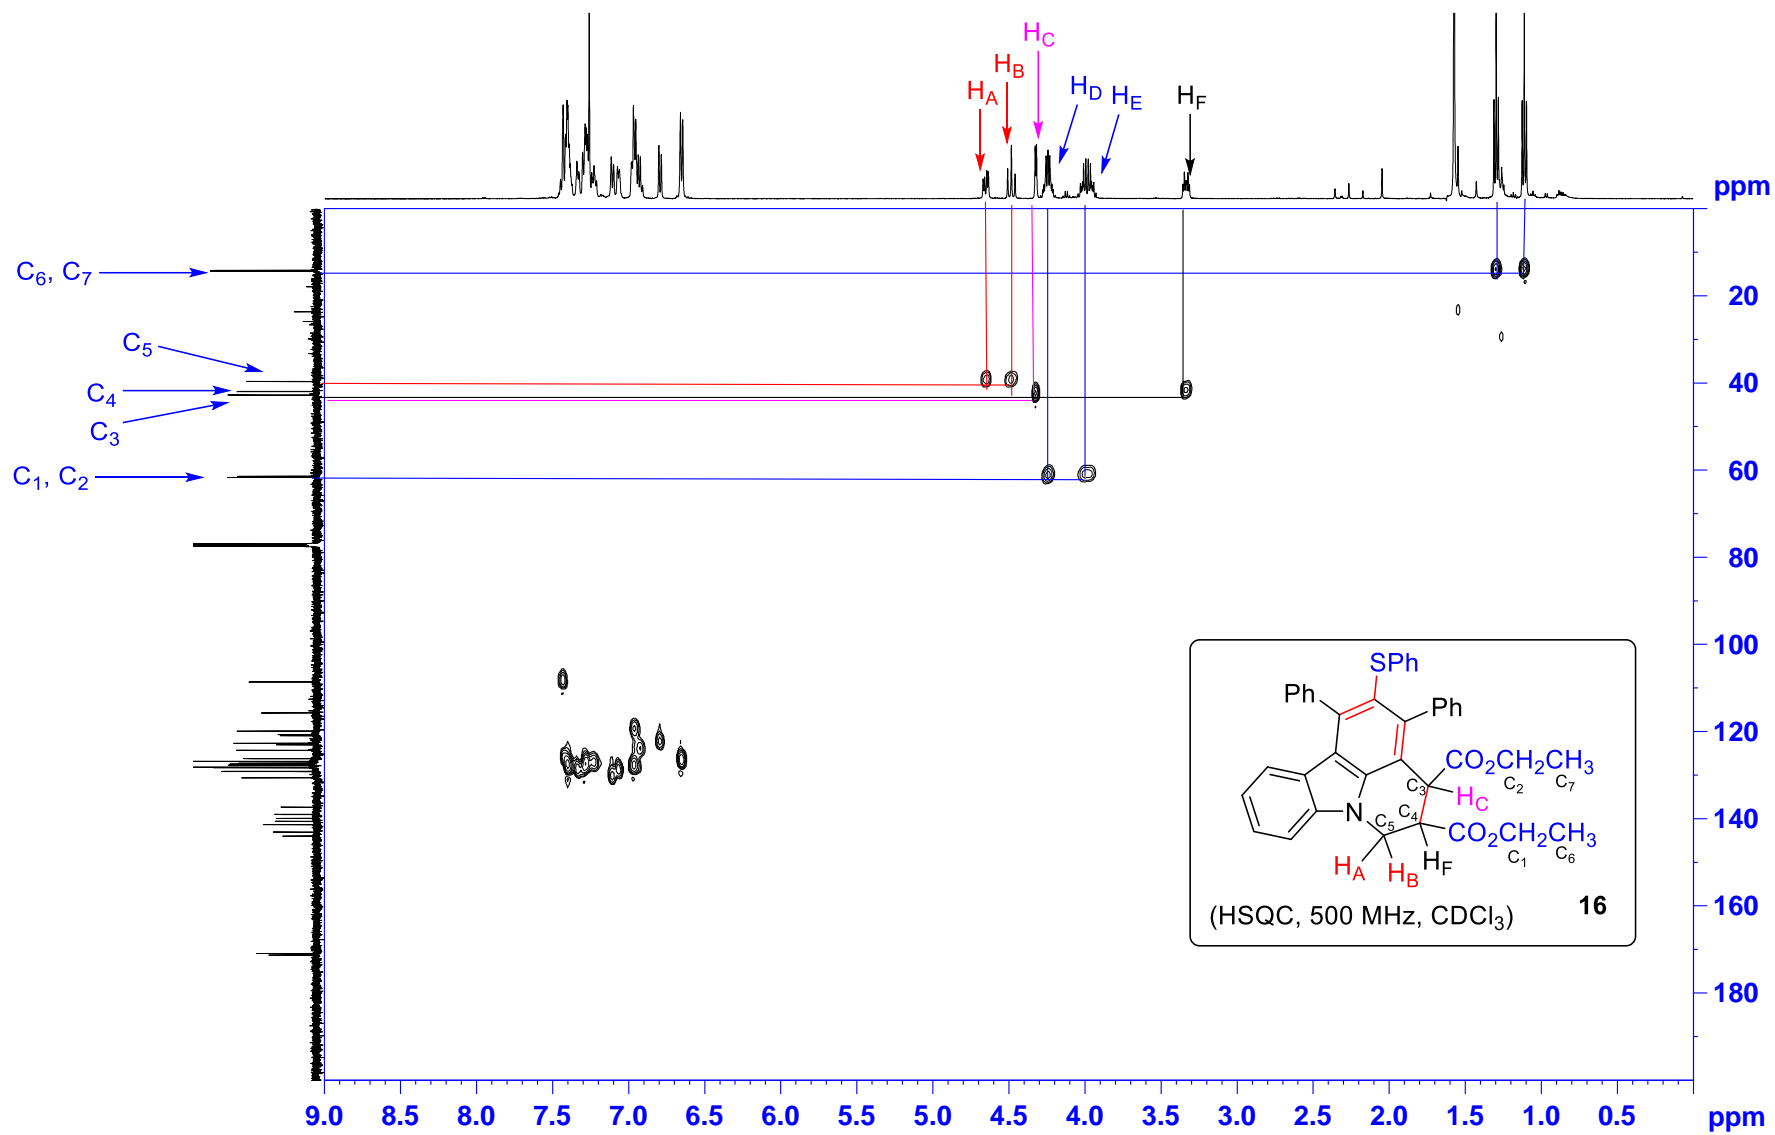



SJG-NEGI-1-61-3P-HMBC

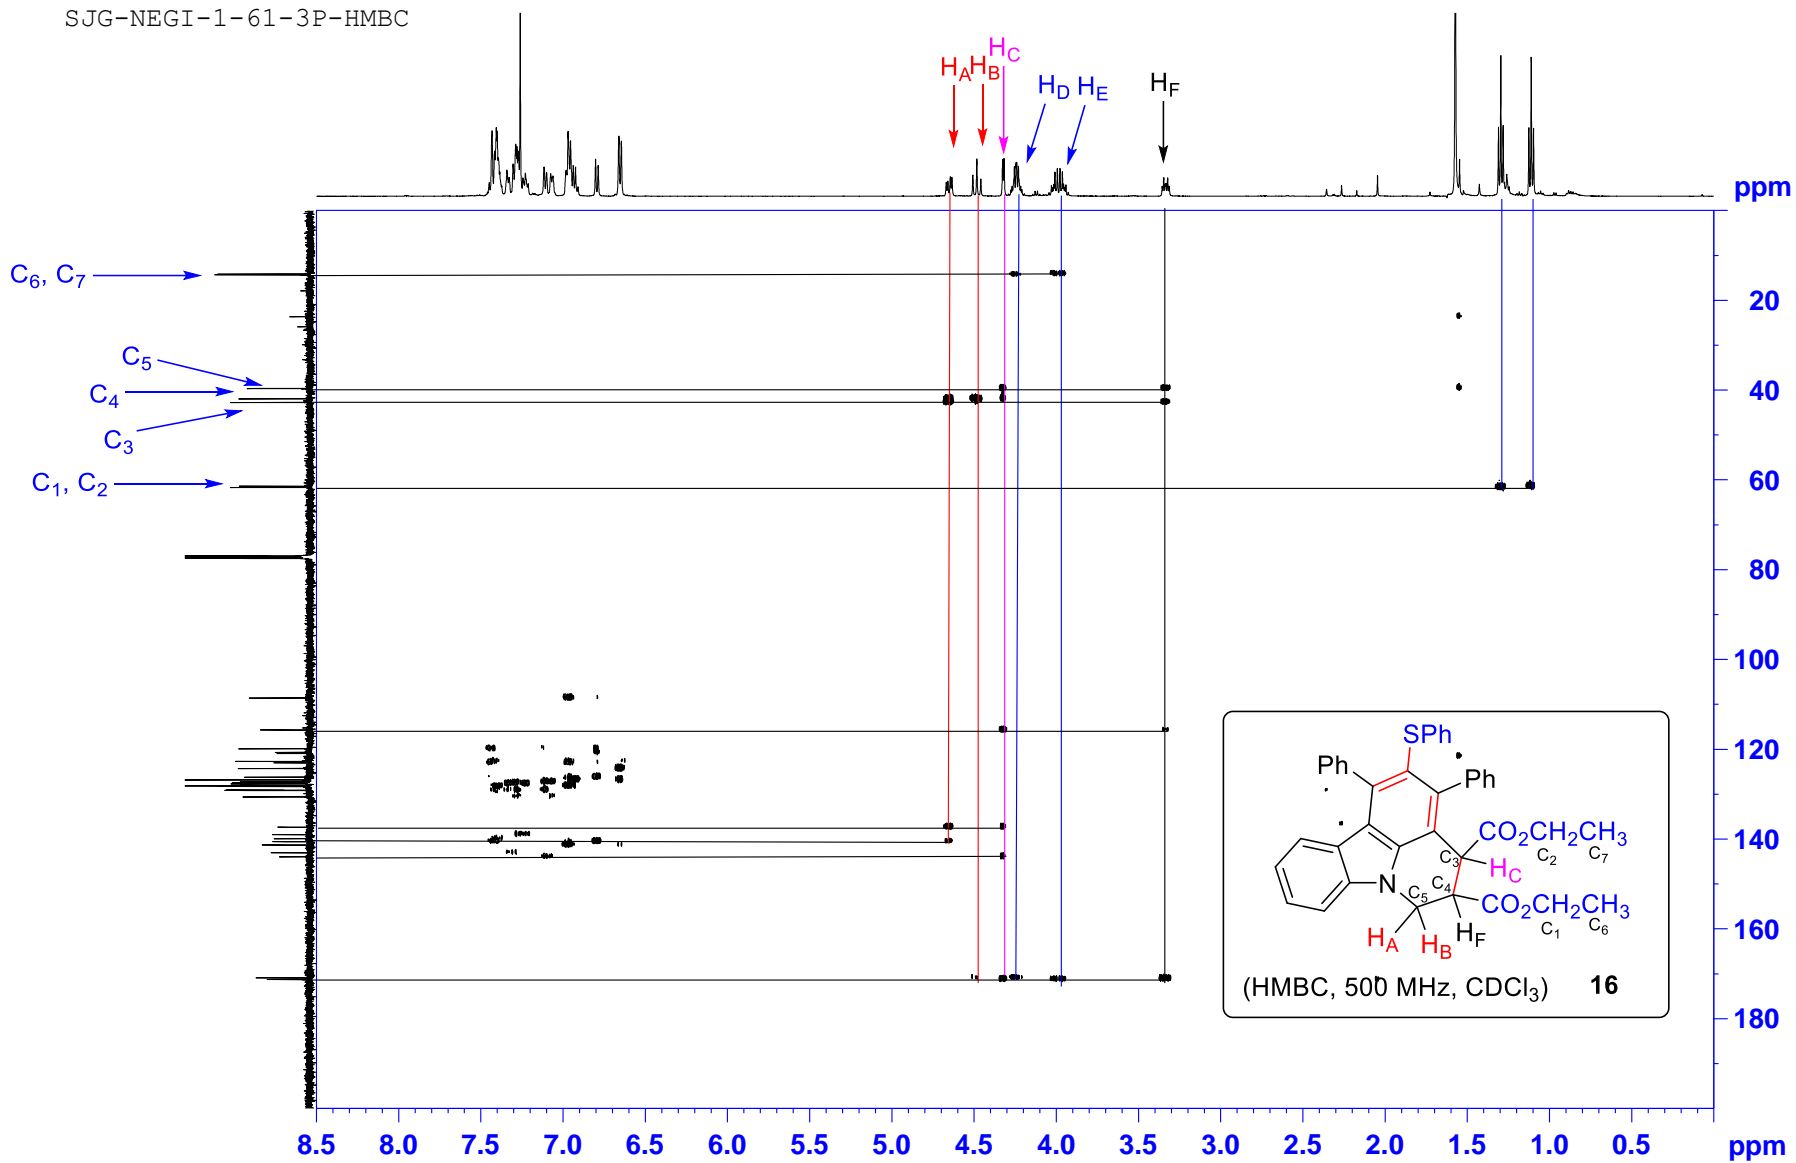

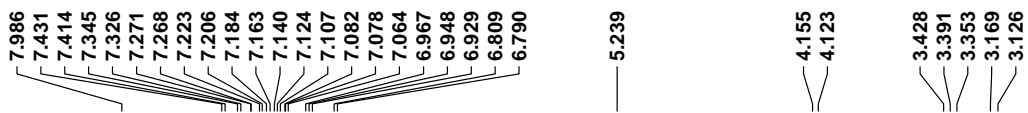

SJG-NEGI-1-66-1H

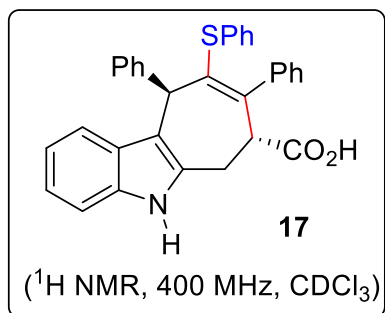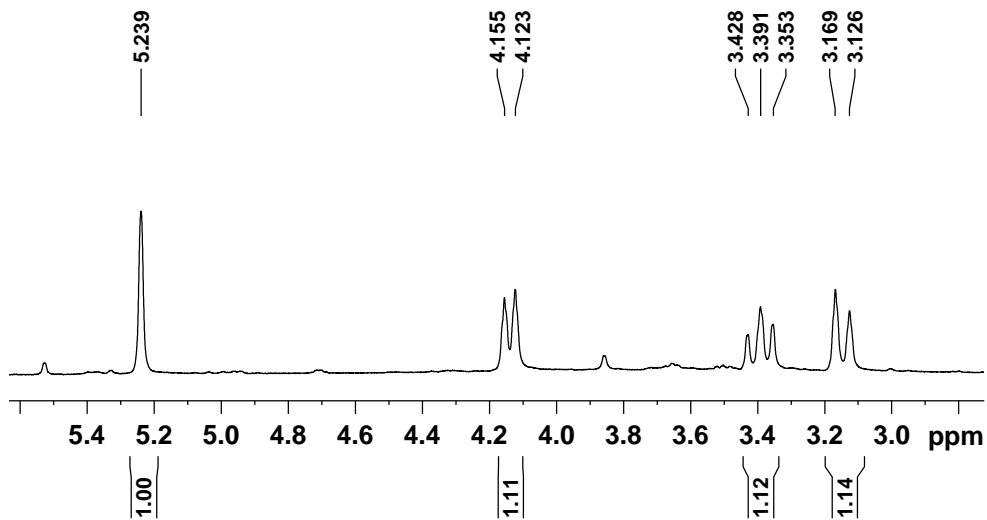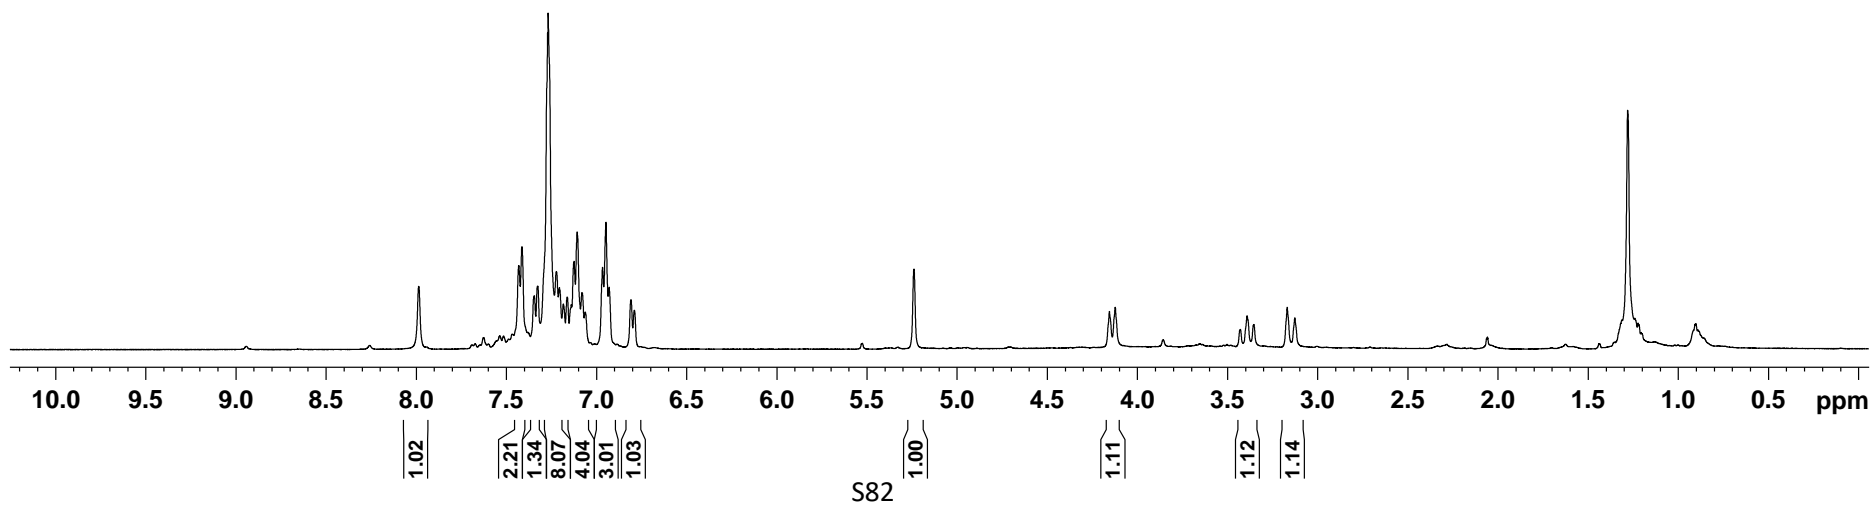

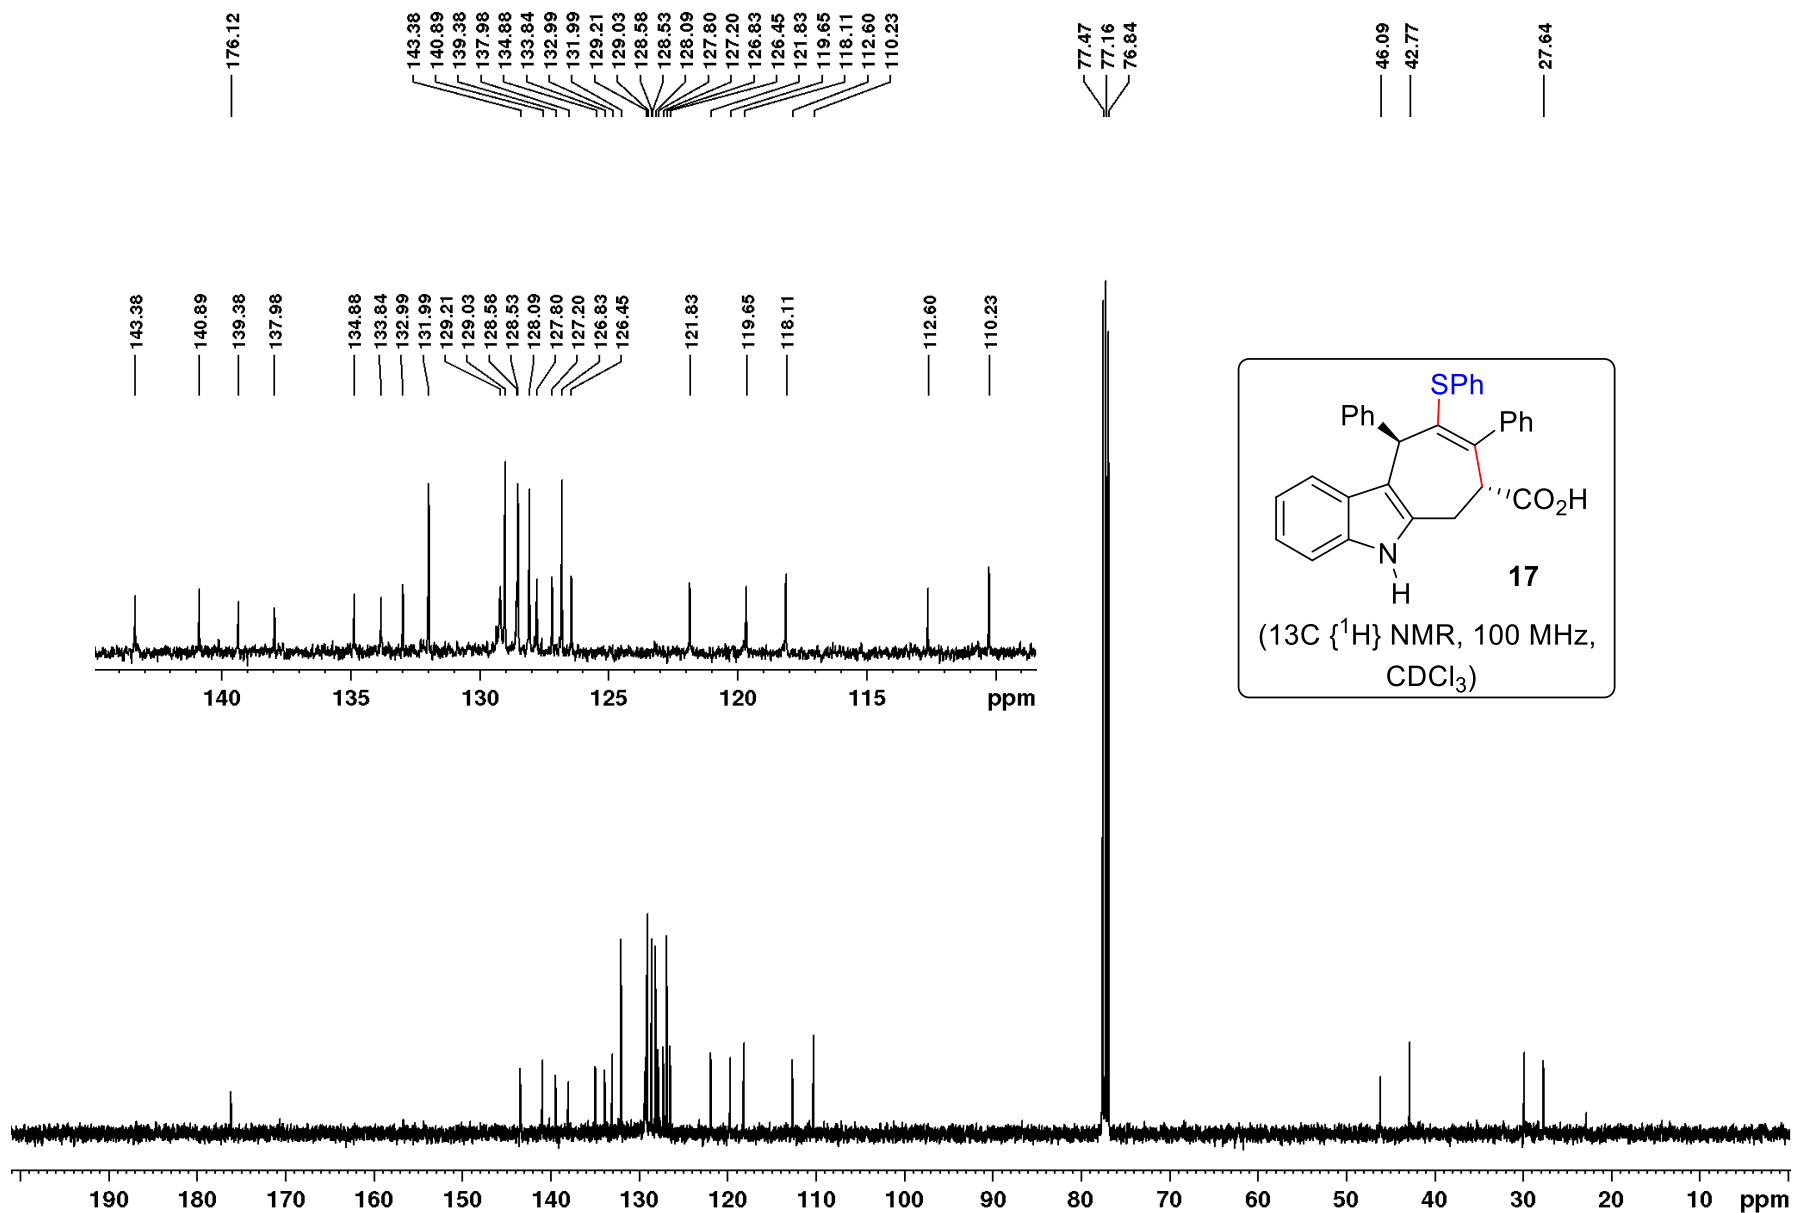

SJG-NEGI-402-5-1H

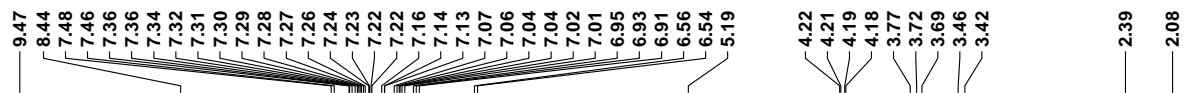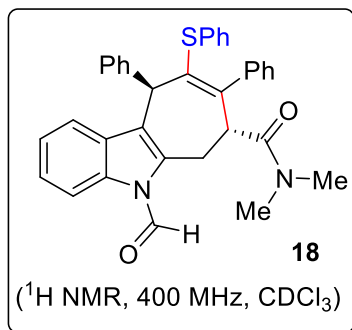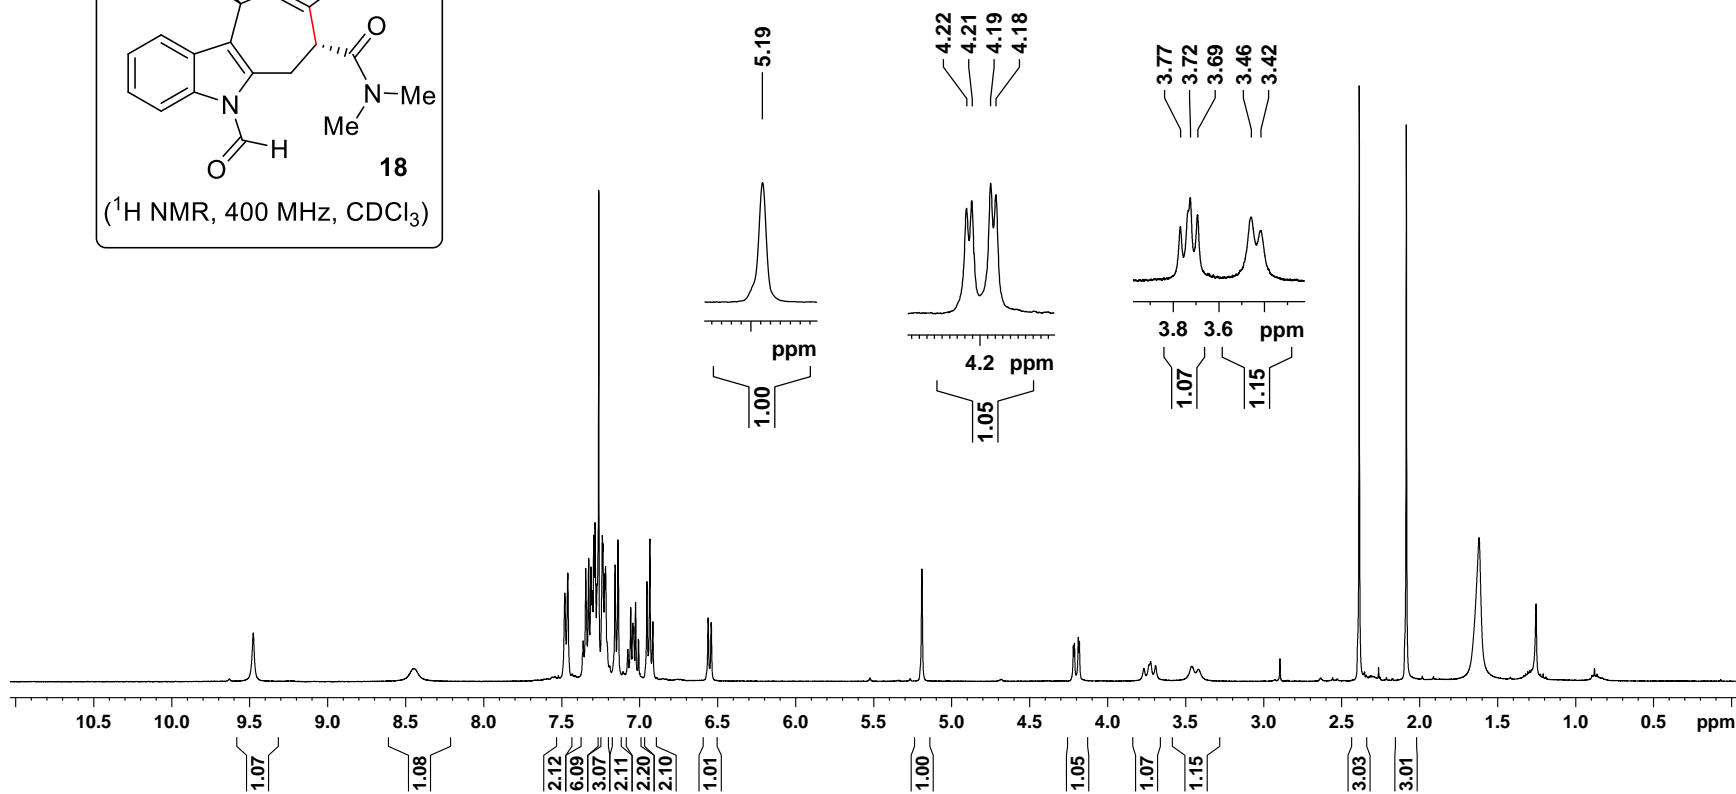



9.18  
8.03  
8.01  
8.01  
7.46  
7.45  
7.44  
7.43  
7.37  
7.35  
7.33  
7.32  
7.32  
7.31  
7.30  
7.30  
7.29  
7.24  
7.22  
7.21  
7.20  
7.20  
7.19  
7.18  
7.18  
7.17  
7.16  
7.15  
7.15  
7.14  
7.14  
7.11  
7.11  
7.10  
7.08  
7.08  
7.07  
7.06  
7.05  
7.05  
7.03  
7.03  
7.02  
7.01  
7.01  
6.95  
6.94  
6.84  
6.83  
6.82  
6.81  
4.96  
4.95  
4.94  
4.55  
4.55  
3.51  
3.49  
3.47  
3.45  
3.38  
3.37  
3.33  
3.32

SJG-NEGI-1-64-3-2P-1H

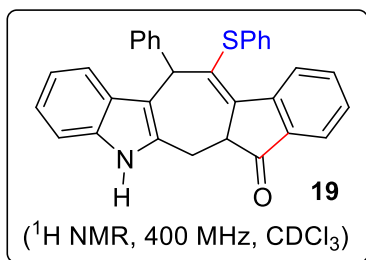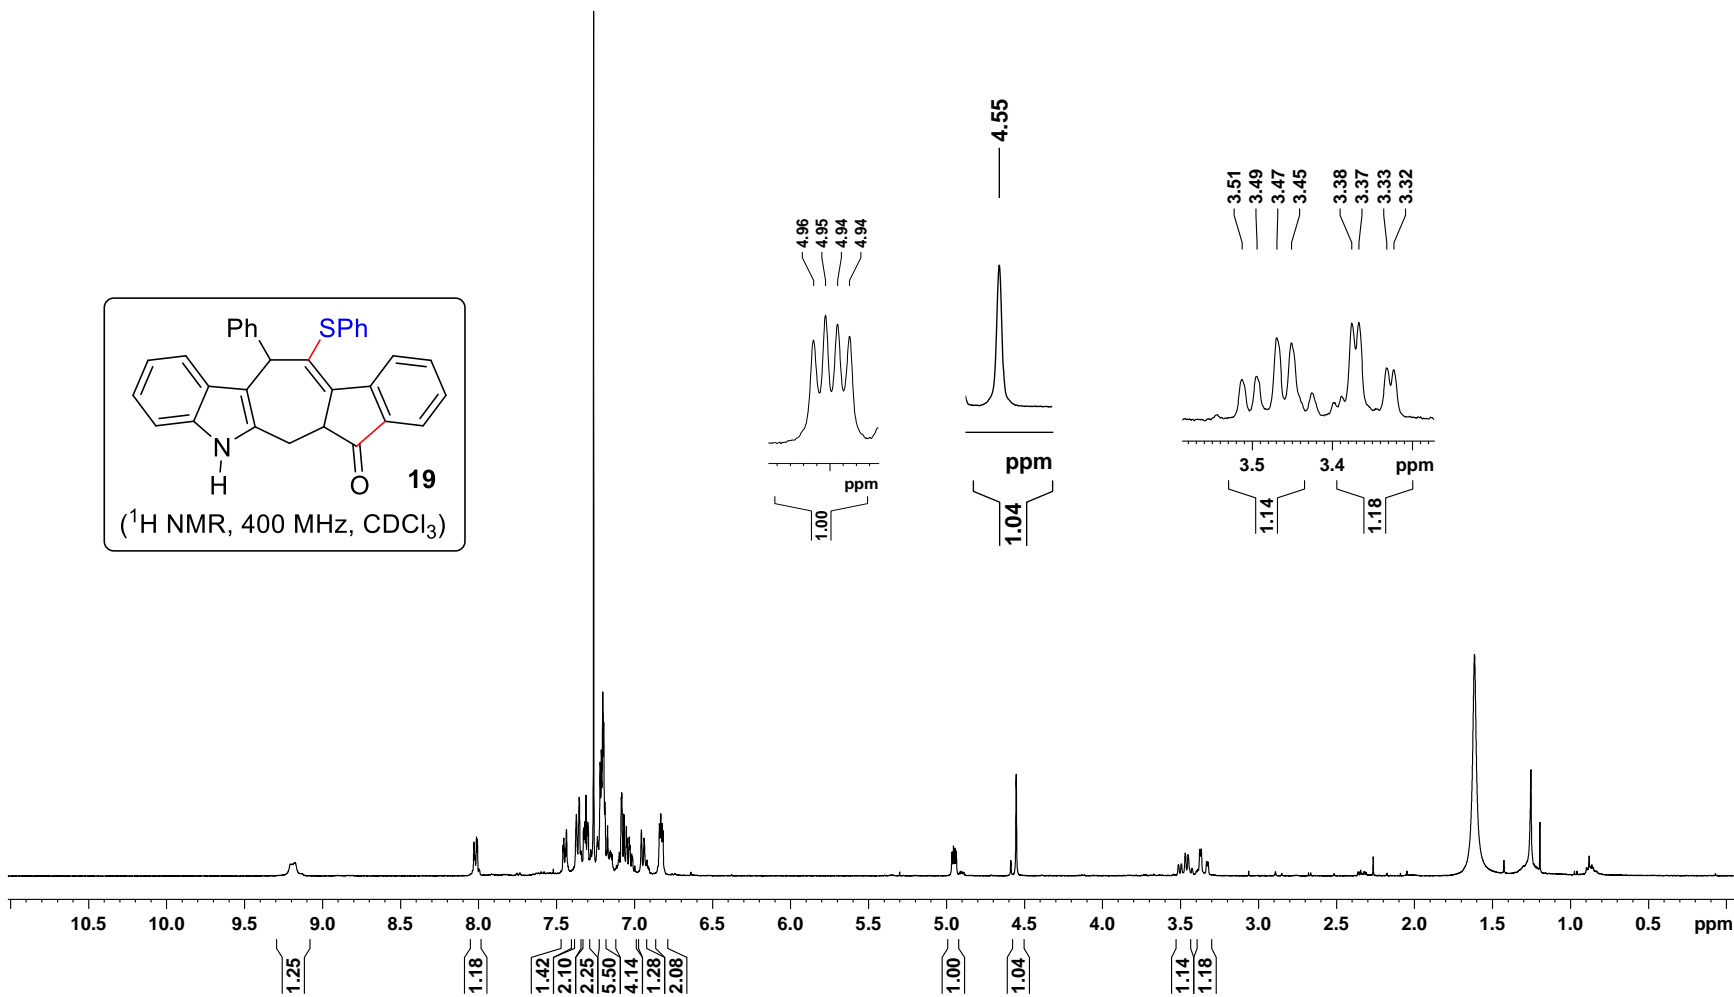

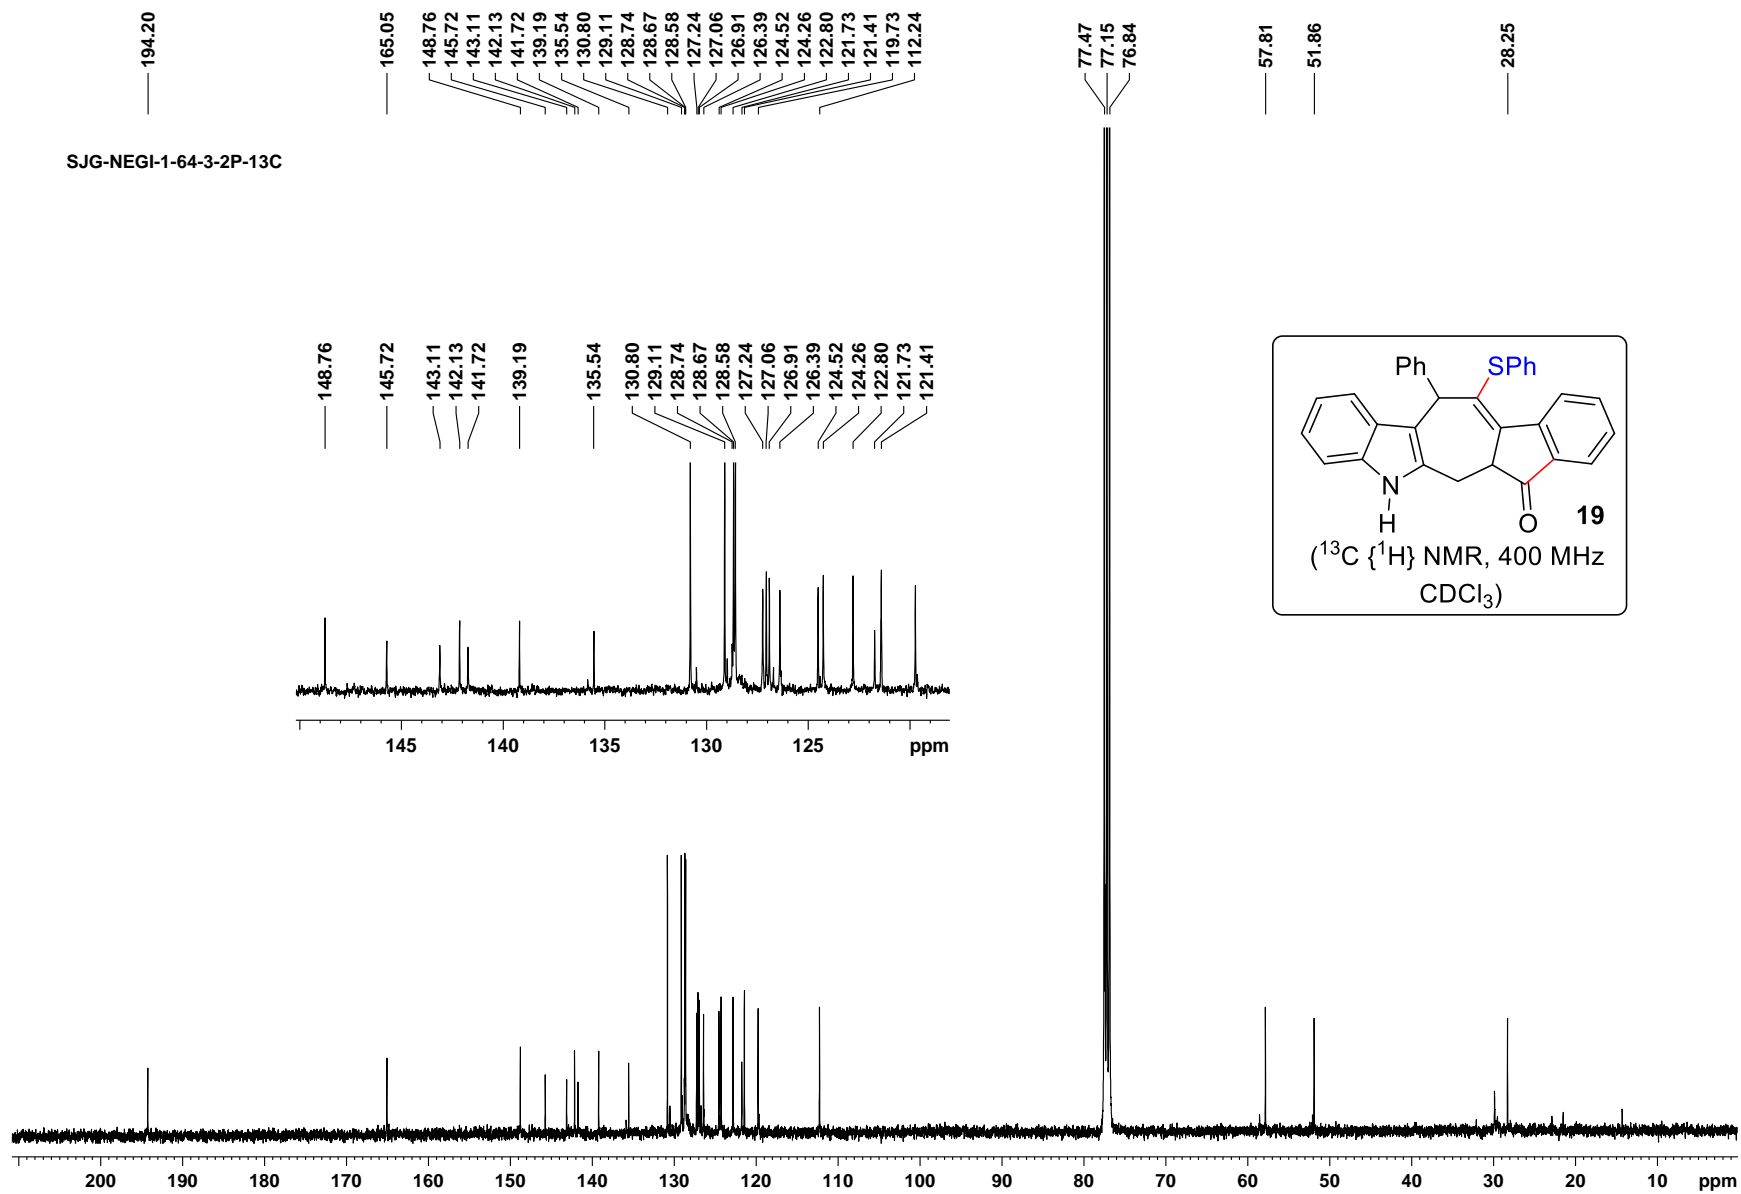

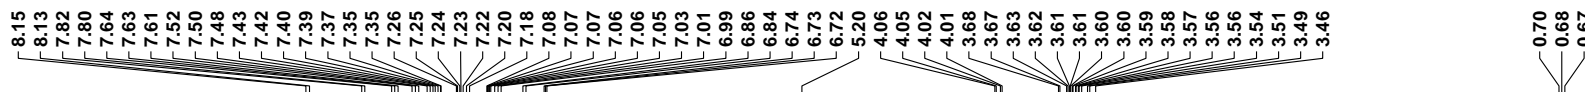

SJG-NEGI-1-62-1H

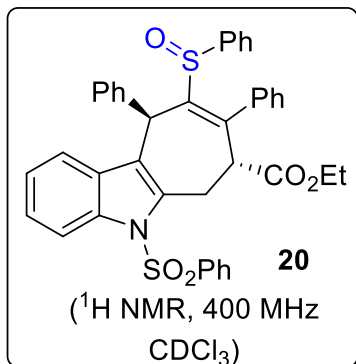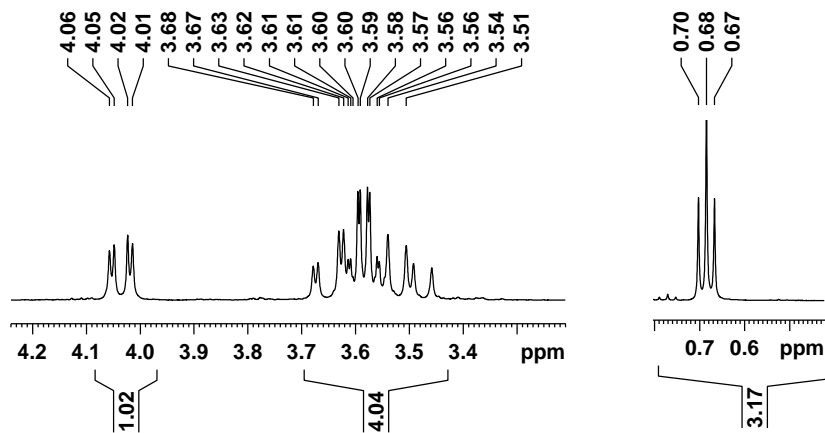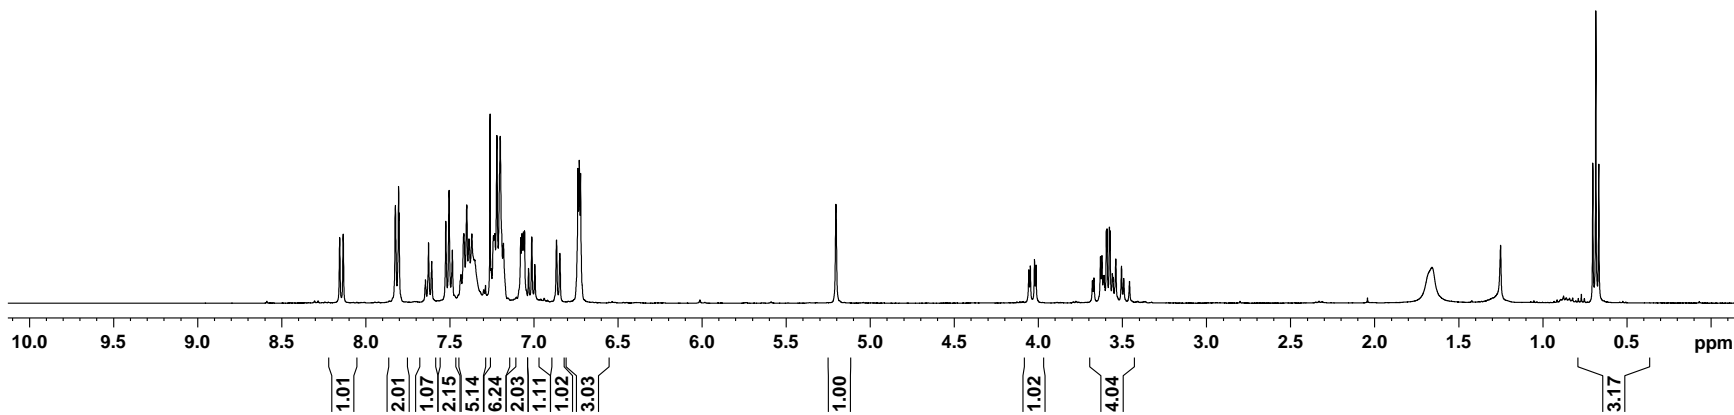



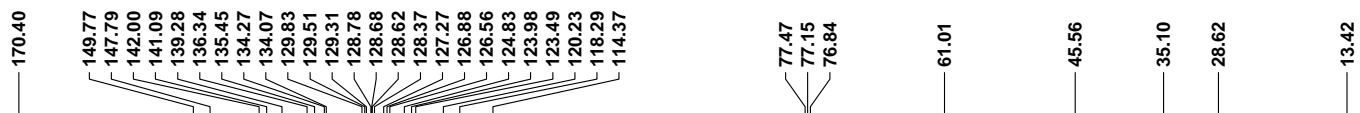

SJG-NEGI-1-62-13C

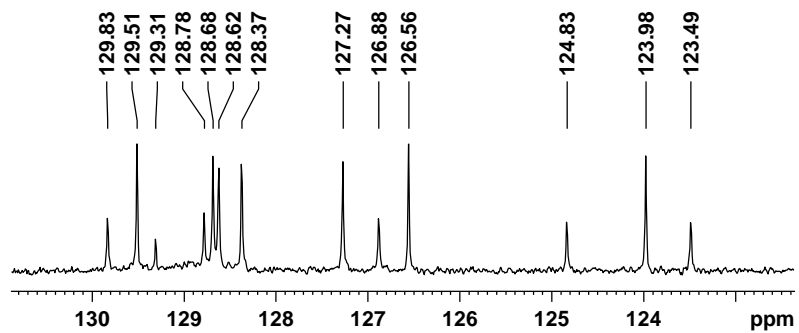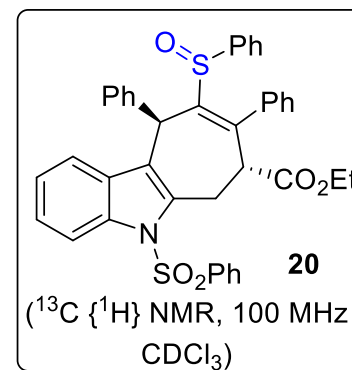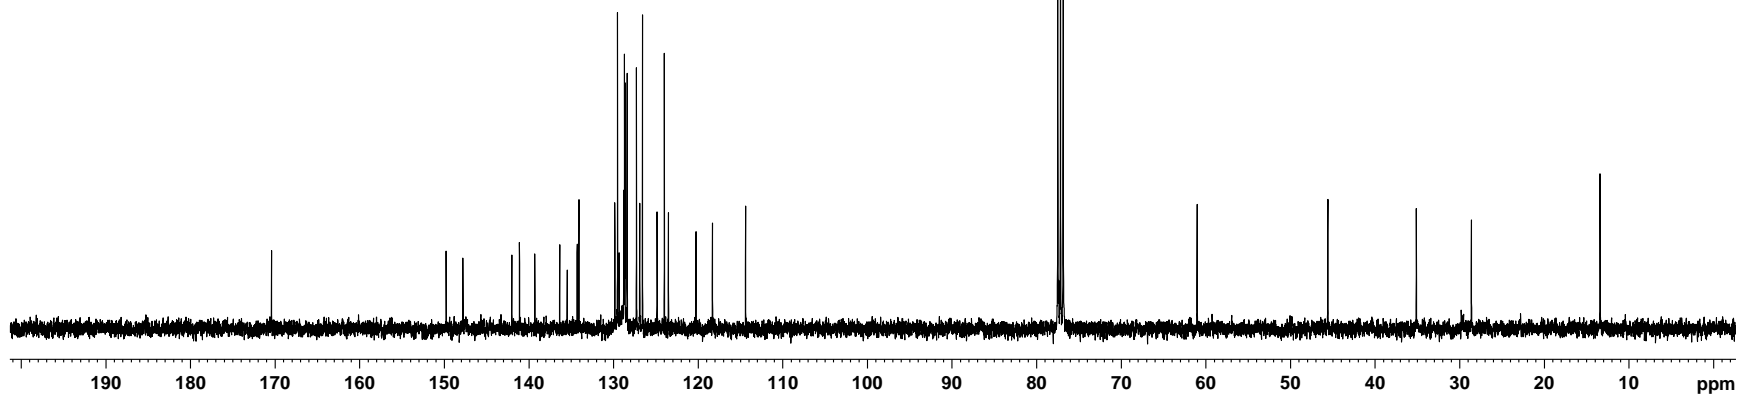



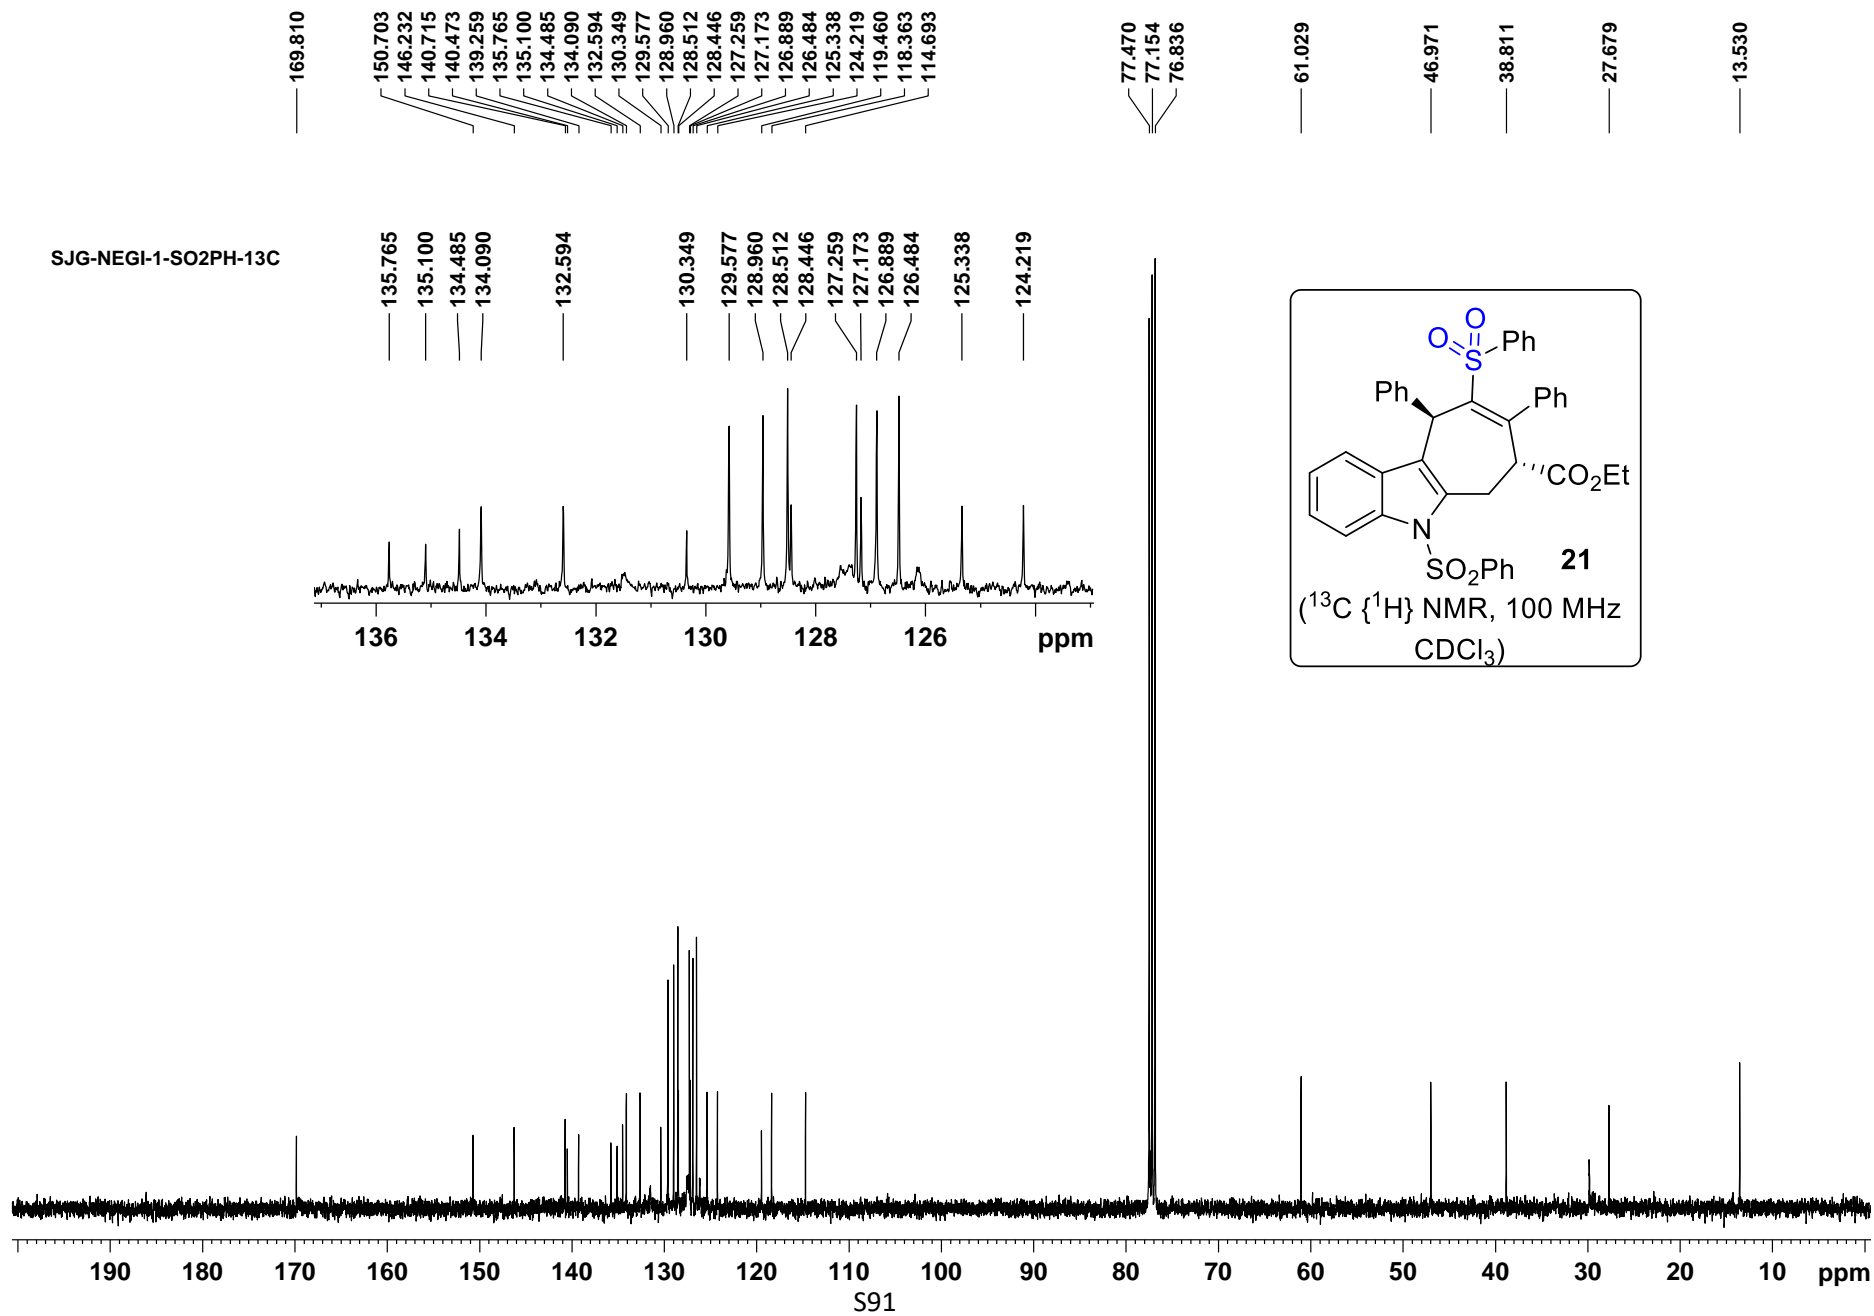

## Crystal data and structure refinement for 8b

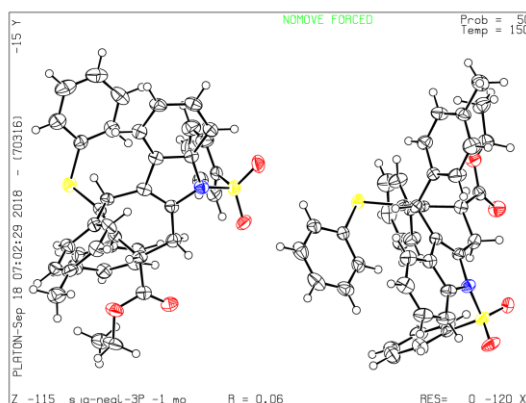

Counter probability = 50%

|                        |                                                                 |                                                                              |                                 |
|------------------------|-----------------------------------------------------------------|------------------------------------------------------------------------------|---------------------------------|
| Identification code    | <b>8b</b>                                                       |                                                                              |                                 |
| CCDC                   | 2296800                                                         |                                                                              |                                 |
| Solvent                | CH <sub>2</sub> Cl <sub>2</sub>                                 |                                                                              |                                 |
| Bond precision:        | C-C = 0.0051 Å                                                  | Wavelength=0.71073                                                           |                                 |
| Cell:                  | a=10.5565(3)<br>alpha=72.058(3)                                 | b=17.7776(7)<br>beta=79.538(3)                                               | c=19.8243(8)<br>gamma=73.177(3) |
| Temperature:           | 150 K                                                           |                                                                              |                                 |
|                        | Calculated                                                      | Reported                                                                     |                                 |
| Volume                 | 3370.5(2)                                                       | 3370.5(2)                                                                    |                                 |
| Space group            | P -1                                                            | P -1                                                                         |                                 |
| Hall group             | -P 1                                                            | -P 1                                                                         |                                 |
| Moiety formula         | C <sub>41</sub> H <sub>35</sub> N O <sub>4</sub> S <sub>2</sub> | 2(C <sub>41</sub> H <sub>35</sub> N O <sub>4</sub> S <sub>2</sub> )          |                                 |
| Sum formula            | C <sub>41</sub> H <sub>35</sub> N O <sub>4</sub> S <sub>2</sub> | C <sub>82</sub> H <sub>70</sub> N <sub>2</sub> O <sub>8</sub> S <sub>4</sub> |                                 |
| Mr                     | 669.82                                                          | 1339.64                                                                      |                                 |
| Dx,g cm <sup>-3</sup>  | 1.320                                                           | 1.320                                                                        |                                 |
| Z                      | 4                                                               | 2                                                                            |                                 |
| Mu (mm <sup>-1</sup> ) | 0.203                                                           | 0.203                                                                        |                                 |
| F000                   | 1408.0                                                          | 1408.0                                                                       |                                 |
| F000'                  | 1409.56                                                         |                                                                              |                                 |
| h,k,lmax               | 12,21,23                                                        | 12,21,23                                                                     |                                 |
| Nref                   | 11892                                                           | 11573                                                                        |                                 |
| Tmin,Tmax              | 0.971,0.994                                                     | 0.854,1.000                                                                  |                                 |
| Tmin'                  | 0.964                                                           |                                                                              |                                 |
| Correction method=     | # Reported T                                                    | Limits:                                                                      | Tmin=0.854 Tmax=1.000           |
| AbsCorr = MULTI-SCAN   |                                                                 |                                                                              |                                 |
| Data completeness=     | 0.973                                                           | Theta(max)= 24.999                                                           |                                 |
| R(reflections)=        | 0.0599 ( 7900)                                                  | wR2(reflections)=                                                            | 0.1604( 11573)                  |
| S = 1.058              | Npar= 869                                                       |                                                                              |                                 |

## Crystal data and structure refinement for 8f

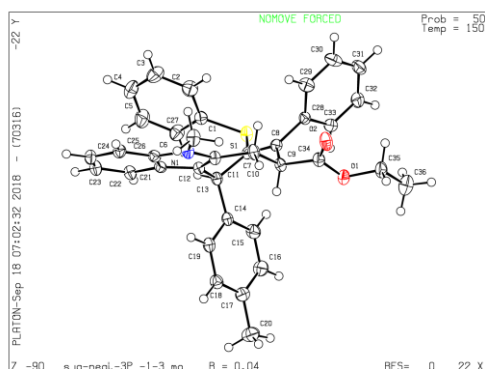

Counter probability = 50%

|                                         |                                                    |                                                    |                 |
|-----------------------------------------|----------------------------------------------------|----------------------------------------------------|-----------------|
| Identification code                     | <b>8f</b>                                          |                                                    |                 |
| Solvent                                 | CH <sub>2</sub> Cl <sub>2</sub>                    |                                                    |                 |
| CCDC                                    | 2296676                                            |                                                    |                 |
| Bond precision:                         | C-C = 0.0029 Å                                     | Wavelength=0.71073                                 |                 |
| Cell:                                   | a=11.0196(3)                                       | b=11.9729(3)                                       | c=12.4127(3)    |
|                                         | alpha=68.202(3)                                    | beta=71.011(3)                                     | gamma=87.557(2) |
| Temperature:                            | 150 K                                              |                                                    |                 |
|                                         | Calculated                                         | Reported                                           |                 |
| Volume                                  | 1432.13(8)                                         | 1432.12(8)                                         |                 |
| Space group                             | P -1                                               | P -1                                               |                 |
| Hall group                              | -P 1                                               | -P 1                                               |                 |
| Moiety formula                          | C <sub>36</sub> H <sub>33</sub> N O <sub>2</sub> S | C <sub>36</sub> H <sub>33</sub> N O <sub>2</sub> S |                 |
| Sum formula                             | C <sub>36</sub> H <sub>33</sub> N O <sub>2</sub> S | C <sub>36</sub> H <sub>33</sub> N O <sub>2</sub> S |                 |
| Mr                                      | 543.69                                             | 543.69                                             |                 |
| Dx,g cm <sup>-3</sup>                   | 1.261                                              | 1.261                                              |                 |
| Z                                       | 2                                                  | 2                                                  |                 |
| Mu (mm <sup>-1</sup> )                  | 0.147                                              | 0.147                                              |                 |
| F000                                    | 576.0                                              | 576.0                                              |                 |
| F000'                                   | 576.47                                             |                                                    |                 |
| h,k,lmax                                | 13,14,14                                           | 13,14,14                                           |                 |
| Nref                                    | 5036                                               | 5021                                               |                 |
| Tmin,Tmax                               | 0.976,0.983                                        | 0.937,1.000                                        |                 |
| Tmin'                                   | 0.976                                              |                                                    |                 |
| Correction method= # Reported T Limits: | Tmin=0.937                                         | Tmax=1.000                                         |                 |
| AbsCorr = MULTI-SCAN                    |                                                    |                                                    |                 |
| Data completeness= 0.997                | Theta(max)= 25.000                                 |                                                    |                 |
| R(reflections)= 0.0416( 4349)           | wR2(reflections)= 0.1053( 5021)                    |                                                    |                 |
| S = 1.041                               | Npar= 364                                          |                                                    |                 |

## Crystal data and structure refinement for 9f

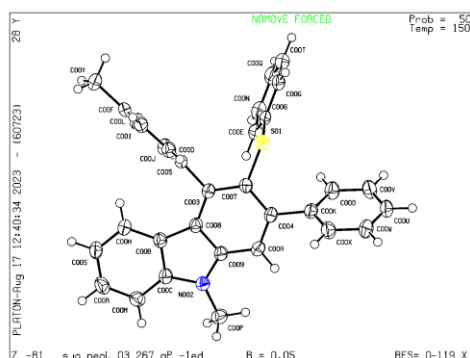

Counter probability = 50%

|                     |                                 |                 |                    |
|---------------------|---------------------------------|-----------------|--------------------|
| Identification code | <b>9f</b>                       |                 |                    |
| Solvent             | CH <sub>2</sub> Cl <sub>2</sub> |                 |                    |
| CCDC                | 2296678                         |                 |                    |
| Bond precision:     | C-C = 0.0038 Å                  |                 | Wavelength=0.71073 |
| Cell:               | a=10.4151(5)                    | b=11.5788(8)    | c=12.6011(9)       |
|                     | alpha=95.743(6)                 | beta=112.337(6) | gamma=116.102(6)   |
| Temperature:        | 150 K                           |                 |                    |

|                        | Calculated                          | Reported                            |
|------------------------|-------------------------------------|-------------------------------------|
| Volume                 | 1195.11(18)                         | 1195.11(15)                         |
| Space group            | P -1                                | P -1                                |
| Hall group             | -P 1                                | -P 1                                |
| Moiety formula         | C <sub>32</sub> H <sub>25</sub> N S | C <sub>32</sub> H <sub>25</sub> N S |
| Sum formula            | C <sub>32</sub> H <sub>25</sub> N S | C <sub>32</sub> H <sub>25</sub> N S |
| Mr                     | 455.59                              | 455.59                              |
| Dx, g cm <sup>-3</sup> | 1.266                               | 1.266                               |
| Z                      | 2 2                                 |                                     |
| Mu (mm <sup>-1</sup> ) | 0.157                               | 0.157                               |
| F000                   | 480.0                               | 480.0                               |
| F000'                  | 480.41                              |                                     |
| h,k,lmax               | 12,13,14                            | 12,13,14                            |
| Nref                   | 4206 4207                           |                                     |
| Tmin,Tmax              | 0.941,0.957                         | 0.700,1.000                         |
| Tmin'                  | 0.906                               |                                     |
| Correction method=     | # Reported T Limits:                | Tmin=0.700 Tmax=1.000               |
| AbsCorr =              | MULTI-SCAN                          |                                     |

Data completeness= 1.000      Theta(max)= 24.995

R(reflections)= 0.0484( 2994)

wR2(reflections)=  
0.1353( 4207)

S = 1.047

Npar= 310

## Crystal data and structure refinement for 8p

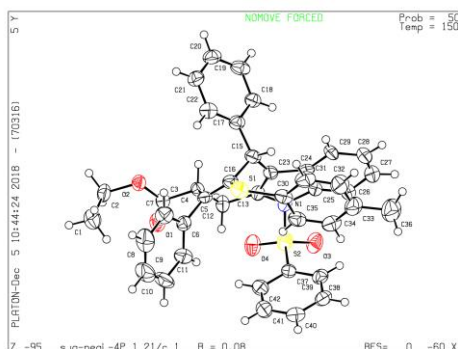

Counter probability = 50%

|                                         |                                                                 |                                  |                                                                 |
|-----------------------------------------|-----------------------------------------------------------------|----------------------------------|-----------------------------------------------------------------|
| Identification code                     | <b>8p</b>                                                       |                                  |                                                                 |
| Solvent                                 | CH <sub>2</sub> Cl <sub>2</sub>                                 |                                  |                                                                 |
| CCDC                                    | 2296804                                                         |                                  |                                                                 |
| Bond precision:                         | C-C = 0.0075 Å                                                  |                                  | Wavelength=0.71073                                              |
| Cell:                                   | a=19.4285(18)                                                   | b=11.6342(8)                     | c=16.4121(14)                                                   |
|                                         | alpha=90                                                        | beta=113.21(1)                   | gamma=90                                                        |
| Temperature:                            | 150 K                                                           |                                  |                                                                 |
|                                         | Calculated                                                      |                                  | Reported                                                        |
| Volume                                  | 3409.5(6)                                                       |                                  | 3409.5(5)                                                       |
| Space group                             | P 21/c                                                          |                                  | P 1 21/c 1                                                      |
| Hall group                              | -P 2ybc                                                         |                                  | -P 2ybc                                                         |
| Moiety formula                          | C <sub>41</sub> H <sub>35</sub> N O <sub>4</sub> S <sub>2</sub> |                                  | C <sub>41</sub> H <sub>35</sub> N O <sub>4</sub> S <sub>2</sub> |
| Sum formula                             | C <sub>41</sub> H <sub>35</sub> N O <sub>4</sub> S <sub>2</sub> |                                  | C <sub>41</sub> H <sub>35</sub> N O <sub>4</sub> S <sub>2</sub> |
| Mr                                      | 669.82                                                          |                                  | 669.82                                                          |
| Dx,g cm <sup>-3</sup>                   | 1.305                                                           |                                  | 1.305                                                           |
| Z                                       | 4                                                               |                                  | 4                                                               |
| Mu (mm <sup>-1</sup> )                  | 0.200                                                           |                                  | 0.200                                                           |
| F000                                    | 1408.0                                                          |                                  | 1408.0                                                          |
| F000'                                   | 1409.56                                                         |                                  |                                                                 |
| h,k,lmax                                | 23,13,19                                                        |                                  | 23,13,19                                                        |
| Nref 5999 5997                          |                                                                 |                                  |                                                                 |
| Tmin,Tmax                               | 0.972,0.984                                                     |                                  | 0.611,1.000                                                     |
| Tmin'                                   | 0.965                                                           |                                  |                                                                 |
| Correction method= # Reported T Limits: |                                                                 | Tmin=0.611                       | Tmax=1.000                                                      |
| AbsCorr = MULTI-SCAN                    |                                                                 |                                  |                                                                 |
| Data completeness= 1.000                |                                                                 | Theta(max)= 24.999               |                                                                 |
| R(reflections)= 0.0758 ( 3394)          |                                                                 | wR2(reflections)= 0.2707 ( 5997) |                                                                 |
| S = 1.033                               | Npar= 435                                                       |                                  |                                                                 |

## Crystal data and structure refinement for 10t

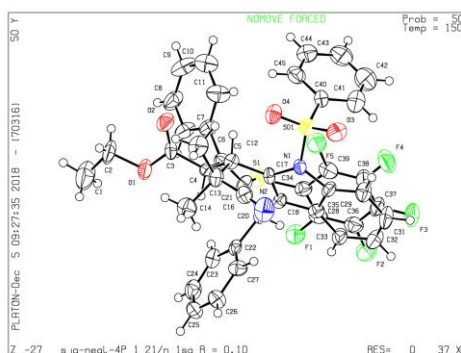

Counter probability = 50%

|                                                                                         |                                                                                                            |                                                                                             |                    |
|-----------------------------------------------------------------------------------------|------------------------------------------------------------------------------------------------------------|---------------------------------------------------------------------------------------------|--------------------|
| Identification code                                                                     | <b>10t</b>                                                                                                 |                                                                                             |                    |
| Solvent                                                                                 | CH <sub>2</sub> Cl <sub>2</sub>                                                                            |                                                                                             |                    |
| CCDC                                                                                    | 2296802                                                                                                    |                                                                                             |                    |
| Bond precision:                                                                         | C-C = 0.0100 Å                                                                                             |                                                                                             | Wavelength=0.71073 |
| Cell:                                                                                   | a=10.3514(6)                                                                                               | b=27.898(2)                                                                                 | c=15.1231(11)      |
|                                                                                         | alpha=90                                                                                                   | beta=101.799(7)                                                                             | gamma=90           |
| Temperature:                                                                            | 150 K                                                                                                      |                                                                                             |                    |
|                                                                                         | Calculated                                                                                                 | Reported                                                                                    |                    |
| Volume                                                                                  | 4275.0(5)                                                                                                  | 4275.0(6)                                                                                   |                    |
| Space group                                                                             | P 21/n                                                                                                     | P 1 21/n 1                                                                                  |                    |
| Hall group                                                                              | -P 2yn                                                                                                     | -P 2yn                                                                                      |                    |
| Moiety formula                                                                          | C <sub>44</sub> H <sub>33</sub> F <sub>5</sub> N <sub>2</sub> O <sub>4</sub> S <sub>2</sub> [+<br>solvent] | C <sub>44</sub> H <sub>33</sub> F <sub>5</sub> N <sub>2</sub> O <sub>4</sub> S <sub>2</sub> |                    |
| Sum formula                                                                             | C <sub>44</sub> H <sub>33</sub> F <sub>5</sub> N <sub>2</sub> O <sub>4</sub> S <sub>2</sub> [+<br>Solvent] | C <sub>44</sub> H <sub>33</sub> F <sub>5</sub> N <sub>2</sub> O <sub>4</sub> S <sub>2</sub> |                    |
| Mr                                                                                      | 812.84                                                                                                     | 812.84                                                                                      |                    |
| D <sub>x</sub> , g cm <sup>-3</sup>                                                     | 1.263                                                                                                      | 1.263                                                                                       |                    |
| Z                                                                                       | 4                                                                                                          | 4                                                                                           |                    |
| Mu (mm <sup>-1</sup> )                                                                  | 0.189                                                                                                      | 0.189                                                                                       |                    |
| F <sub>000</sub>                                                                        | 1680.0                                                                                                     | 1680.0                                                                                      |                    |
| F <sub>000</sub> '                                                                      | 1681.92                                                                                                    |                                                                                             |                    |
| h,k,l <sub>max</sub>                                                                    | 12,33,17                                                                                                   | 12,33,17                                                                                    |                    |
| N <sub>ref</sub>                                                                        | 7532                                                                                                       | 7529                                                                                        |                    |
| T <sub>min</sub> ,T <sub>max</sub>                                                      | 0.967,0.981                                                                                                | 0.365,1.000                                                                                 |                    |
| T <sub>min</sub> '                                                                      | 0.963                                                                                                      |                                                                                             |                    |
| Correction method= # Reported T Limits: T <sub>min</sub> =0.365 T <sub>max</sub> =1.000 |                                                                                                            |                                                                                             |                    |
| AbsCorr = MULTI-SCAN                                                                    |                                                                                                            |                                                                                             |                    |
| Data completeness= 1.000                                                                | Theta(max)= 24.998                                                                                         |                                                                                             |                    |
| R(reflections)= 0.0985( 3702)                                                           | wR2(reflections)= 0.3461( 7529)                                                                            |                                                                                             |                    |
| S = 1.030                                                                               | Npar= 517                                                                                                  |                                                                                             |                    |



## Crystal data and structure refinement for 18

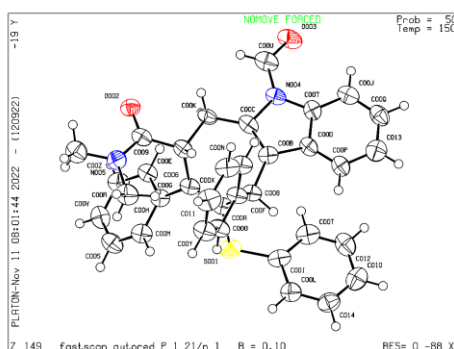

Counter probability = 50%

|                        |                                                                 |                                                                 |             |
|------------------------|-----------------------------------------------------------------|-----------------------------------------------------------------|-------------|
| Identification code    | <b>18</b>                                                       |                                                                 |             |
| Solvent                | CH <sub>2</sub> Cl <sub>2</sub>                                 |                                                                 |             |
| CCDC                   | 2296781                                                         |                                                                 |             |
| Bond precision:        | C-C = 0.0083 Å                                                  | Wavelength=0.71073                                              |             |
| Cell:                  | a=13.651(3)                                                     | b=8.9231(12)                                                    | c=22.780(3) |
|                        | alpha=90                                                        | beta=95.384(15)                                                 | gamma=90    |
| Temperature:           | 150 K                                                           |                                                                 |             |
|                        | Calculated                                                      | Reported                                                        |             |
| Volume                 | 2762.6(8)                                                       | 2762.6(7)                                                       |             |
| Space group            | P 21/n                                                          | P 1 21/n 1                                                      |             |
| Hall group             | -P 2yn                                                          | -P 2yn                                                          |             |
| Moiety formula         | C <sub>35</sub> H <sub>30</sub> N <sub>2</sub> O <sub>2</sub> S | C <sub>35</sub> H <sub>30</sub> N <sub>2</sub> O <sub>2</sub> S |             |
| Sum formula            | C <sub>35</sub> H <sub>30</sub> N <sub>2</sub> O <sub>2</sub> S | C <sub>35</sub> H <sub>30</sub> N <sub>2</sub> O <sub>2</sub> S |             |
| Mr                     | 542.67                                                          | 542.67                                                          |             |
| Dx,g cm <sup>-3</sup>  | 1.305                                                           | 1.305                                                           |             |
| Z                      | 4                                                               | 4                                                               |             |
| Mu (mm <sup>-1</sup> ) | 0.153                                                           | 0.153                                                           |             |
| F000                   | 1144.0                                                          | 1144.0                                                          |             |
| F000'                  | 1144.93                                                         |                                                                 |             |
| h,k,lmax               | 16,10,27                                                        | 16,10,27                                                        |             |
| Nref                   | 4871                                                            | 4785                                                            |             |
| Tmin,Tmax              | 0.978,0.992                                                     | 0.206,1.000                                                     |             |
| Tmin'                  | 0.961                                                           |                                                                 |             |
| Correction method=     | # Reported T Limits:                                            | Tmin=0.206                                                      | Tmax=1.000  |
| AbsCorr = MULTI-SCAN   |                                                                 |                                                                 |             |
| Data completeness=     | 0.982                                                           | Theta(max) = 24.996                                             |             |
| R(reflections)=        | 0.0979( 2396)                                                   | wR2(reflections)=                                               |             |
|                        |                                                                 | 0.2881( 4785)                                                   |             |
| S = 1.015              | Npar= 363                                                       |                                                                 |             |
